# Supplementary material for: Bimodal supramolecular functionalization of carbon nanotubes triggered by covalent bond formation
Source: PubMed Central journal article supplement — Chem Sci. 2016 Nov 4;8(3):1927–35. doi: 10.1039/c6sc03894h (PMC5364655; doi:10.1039/c6sc03894h), 2016-11-04
Supplement: SC-008-C6SC03894H-s001.pdf [file SC-008-C6SC03894H-s001.pdf]

**General.** All solvents were dried according to standard procedures. Reagents used as purchased. Flash chromatography was performed using silica gel (Scharlau 60, 230-240 mesh). Analytical thin layer chromatography (TLC) were performed using aluminium-coated Merck Kieselgel 60 F254 plates. NMR spectra were recorded on a Bruker Avance 300 ( $^1\text{H}$ : 300MHz,  $^{13}\text{C}$ : 75 MHz) spectrometers at 298K, unless otherwise stated using partially deuterated solvents as internal standards. Coupling constants (J) are denoted in Hz and chemical shifts ( $\delta$ ) in ppm. Multiplicities are denoted as follows: s= singlet, d= doublet, t= triplet, m= multiplet. Electrospray ionization mass spectrometry (ESI-HR-MS) and Matrix-assisted Laser desorption ionization (coupled to a Time-Of-Flight analyzer) experiments (MALDI-TOF HR-MS) were recorded on an HP1100MSDspectrometer and a Bruker REFLEX spectrometer, respectively. Thermogravimetric analyses (TGA) were performed using a TA Instruments TGAQ500 with a ramp of 10 °C/min under air from 100 to 1000 °C.

UV-vis-NIR spectrums were performed using a Shimadzu UV-VIS-NIR Spectrophotometer UV-3600. Photoluminescence excitation intensity maps (PLE) were obtained with NanoLog 4 HORIBA. Raman spectra were acquired with a Bruker Senterra confocal Raman microscopy instrument, equipped with 532, 633 and 785 nm lasers. Transmission electron microscopy (TEM) images were obtained with JEOL-JEM 2100F (2.5 Å resolution) instrument.

XPS (X ray Photoelectron Spectroscopy) measurements were performed under Ultra High Vacuum conditions (UHV, with a base pressure of  $7 \times 10^{-10}$  mbar), using a monochromatic Al K $\alpha$  line as exciting photon source for core level analysis ( $h\nu = 1486.7$  eV) and He I line for the Ultraviolet Photoelectron Spectroscopy valence band measurements (UPS,  $h\nu = 21.2$  eV). The emitted photoelectrons were collected in a hemispherical energy analyzer (SPHERA-U7, pass energy set to 20 eV for the XPS measurements to have a resolution of 0.6 eV and 5 eV to have a resolution of 0.1 eV for UPS) and to compensate the built up charge on the sample surface it was necessary (for the XPS measurements) the use of a Flood Gun (FG-500, Specs), with low energy electrons of 3 eV and 40  $\mu$ A.

### General procedure synthesis lineal amines.

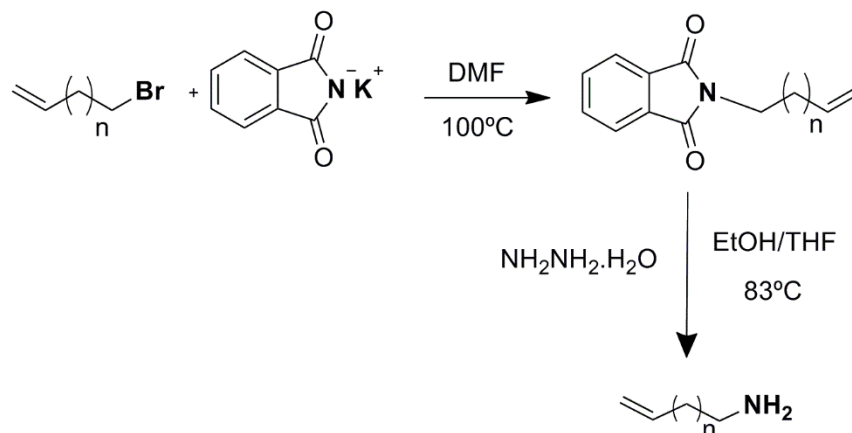

**Compound 7 a-c:** the alkene was charged in a flask, N, N-dimethylformamide was added and the reaction was heated at  $100^\circ\text{C}$  during 2h. The solution was then allowed to come back to room temperature and filtered over celite and the filtrate concentrate in vacuo to give a pale yellow solid in 90-92% yield.

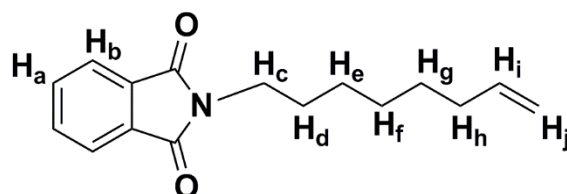

**Compound 7a:**  $^1\text{H}$  NMR (300 MHz,  $\text{CDCl}_3$ )  $\delta$  7.99 (m, 2 $\text{H}_b$ ), 7.76 (m, 2 $\text{H}_a$ ), 5.78 (m, 1 $\text{H}_i$ ), 5.10 (m, 2 $\text{H}_j$ ), 3.78 (m, 2 $\text{H}_c$ ), 2.01 (m, 2 $\text{H}_h$ ), 1.53 (m, 2 $\text{H}_d$ ), 1.49 (m, 6 $\text{H}_{e,f,g}$ ),  $^{13}\text{C}$  NMR (75 MHz,  $\text{CDCl}_3$ )  $\delta$  168.42, 138.89, 133.97, 132.09, 123.21, 114.20, 28.65, 28.58, 28.48, 26.64. HR-MS  $m/z$  calculated for  $\text{C}_{16}\text{H}_{19}\text{NO}_2$  [ $\text{M}-\text{H}^+$ ] 257.1416 found HR-MS 257.1432.

36273-sl1  
SL1

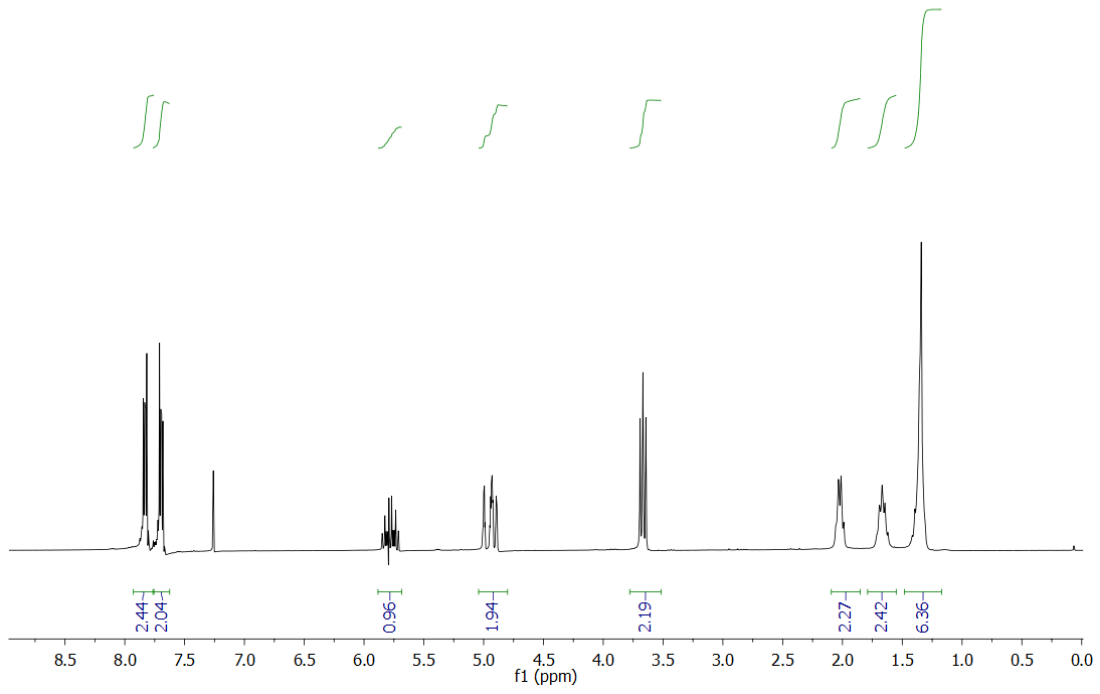

1944t-sl200  
SL200

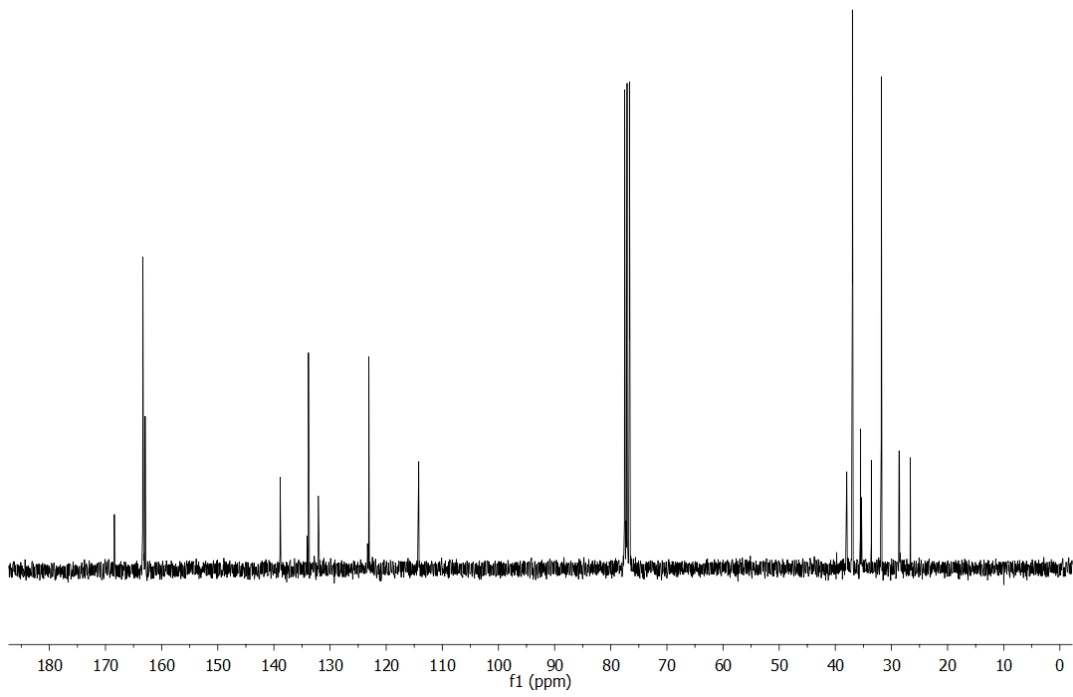

+TOF MS: 3.000 to 3.500 min from QS22681 (recalibrated).wiff  
a=3.57197201642949910e-004, lb=3.76580322871927820e+001 R;

Max. 195.5 counts.

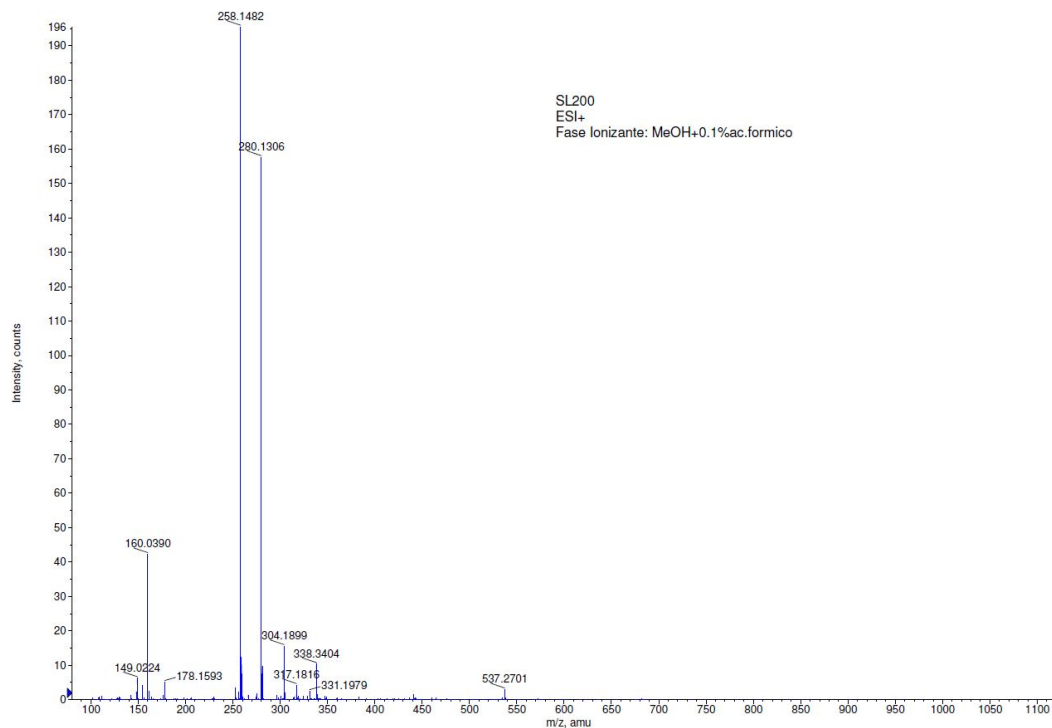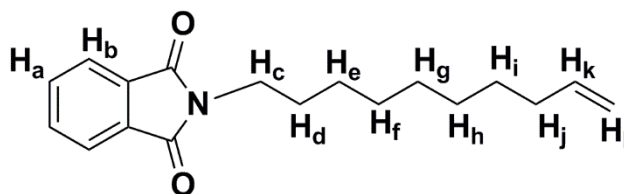

**Compound 7b:**  $^1\text{H}$  NMR (300 MHz,  $\text{CDCl}_3$ )  $\delta$  7.89 (m, 2H<sub>b</sub>), 7.70 (m, 2H<sub>a</sub>), 5.72 (m, 1H<sub>k</sub>), 5.04 (m, 2H<sub>l</sub>), 3.70 (m, 2H<sub>c</sub>), 2.03 (m, 2H<sub>j</sub>), 1.53 (m, 2H<sub>d</sub>), 1.45 (m, 10H<sub>e,f,g,h,i</sub>),  $^{13}\text{C}$  NMR (75 MHz,  $\text{CDCl}_3$ )  $\delta$  168.43, 139.14, 133.81, 132.18, 123.12, 114.12, 38.04, 33.74, 29.28, 29.10, 29.00, 28.84, 28.57, 26.82. MS m/z calculated for  $\text{C}_{18}\text{H}_{23}\text{NO}_2$  285.17 found MALDI TOF 285.17.

SL270  
SL270

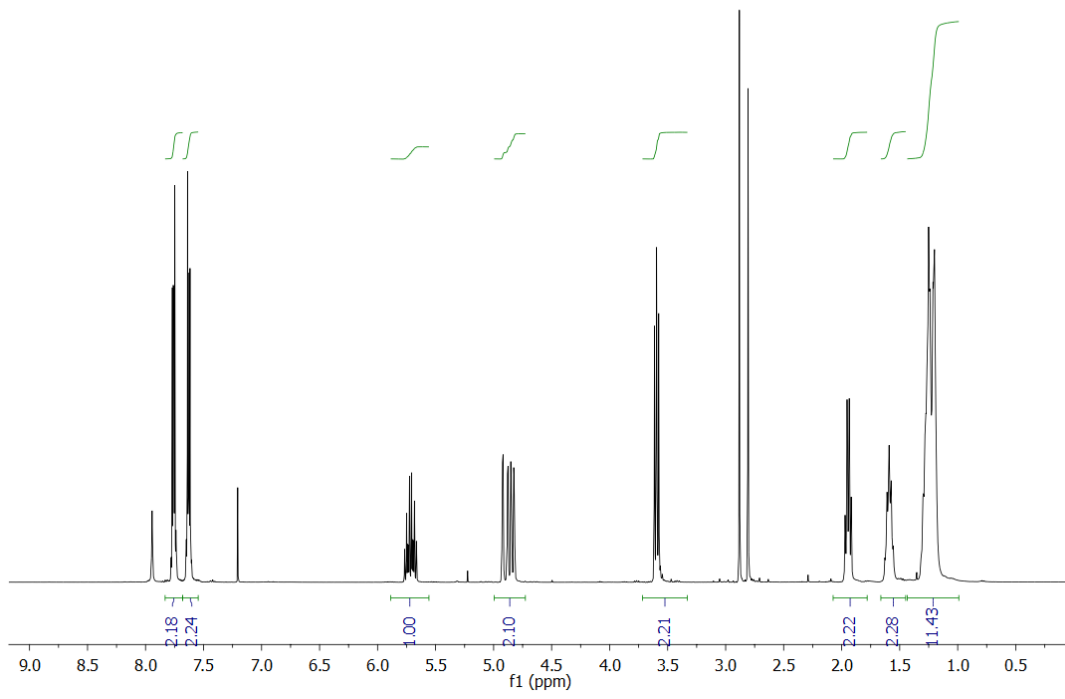

SL270  
SL270

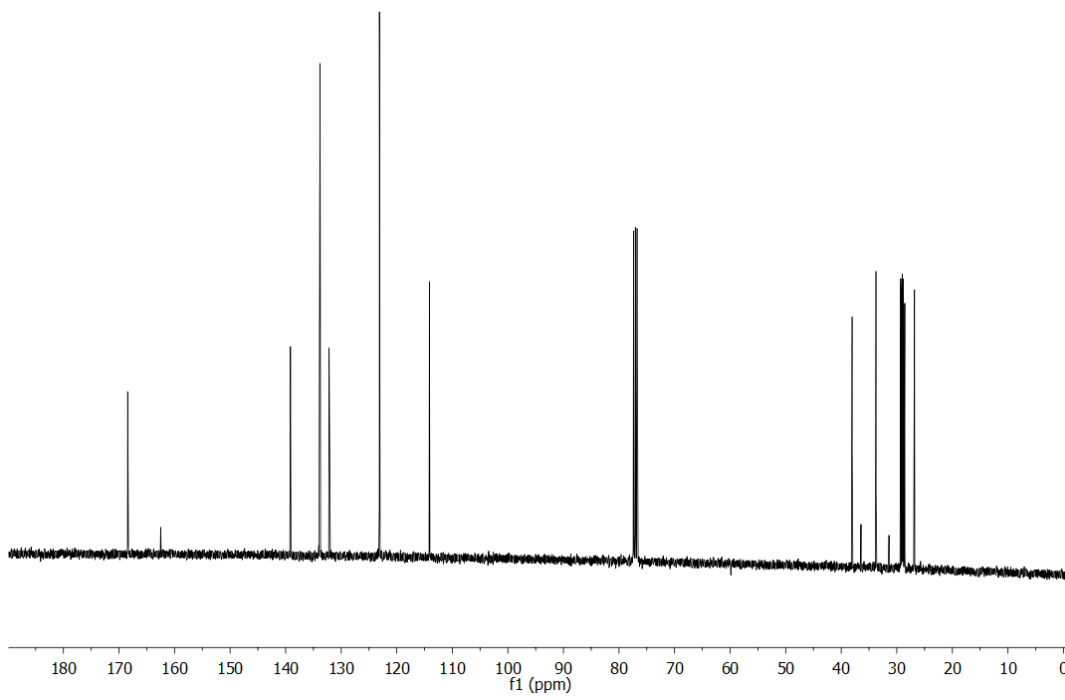

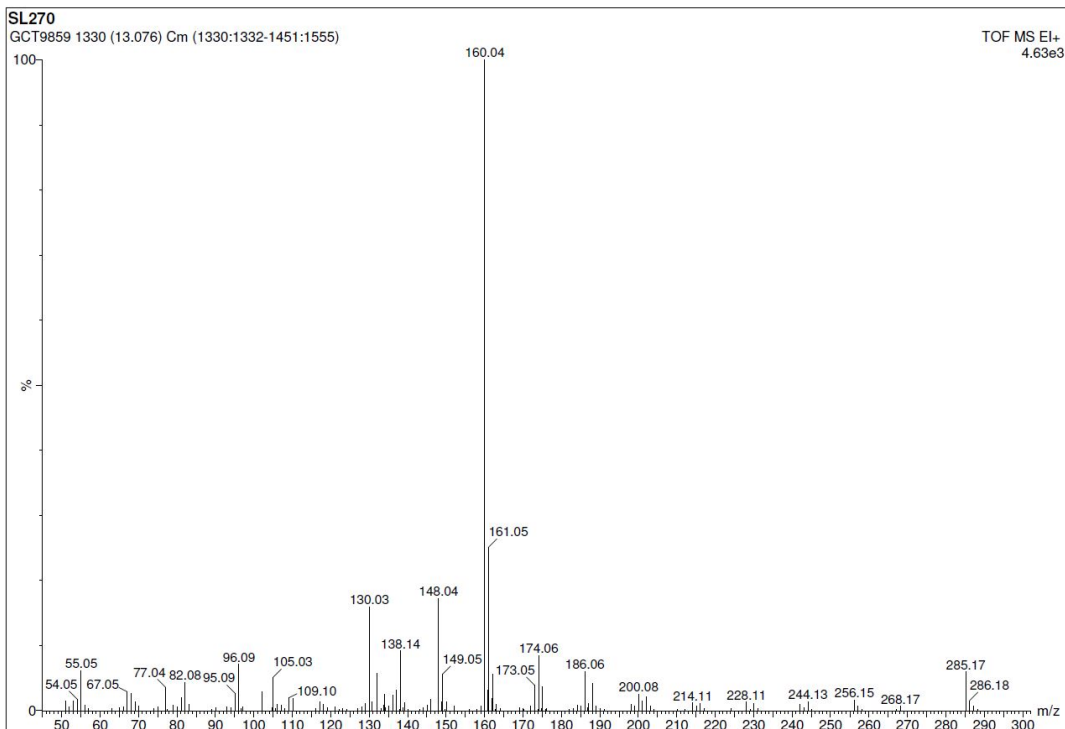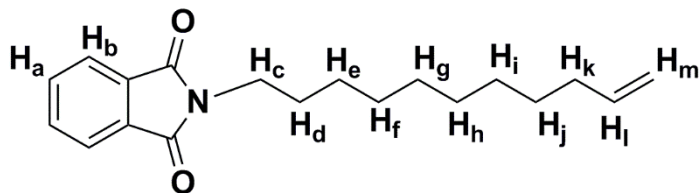

**Compound 7c:**  $^1\text{H}$  NMR (300 MHz,  $\text{CDCl}_3$ )  $\delta$  7.89 (m, 2H<sub>b</sub>), 7.69 (m, 2H<sub>a</sub>), 5.93 (m, 1H<sub>i</sub>), 5.06 (m, 2H<sub>m</sub>), 3.75 (m, 2H<sub>c</sub>), 2.10 (m, 2H<sub>k</sub>), 1.53 (m, 2H<sub>d</sub>), 1.46 (m, 12H<sub>e,f,g,h,i,j</sub>)  $^{13}\text{C}$  NMR (75 MHz,  $\text{CDCl}_3$ )  $\delta$  168.34, 139.08, 133.86, 132.10, 123.14, 114.03, 37.97, 33.70, 29.37, 29.03, 28.81, 28.51, 26.77. HR-MS  $m/z$  calculated for  $\text{C}_{19}\text{H}_{25}\text{NO}_2$  299.1885 found HR-MS 299.1968.

1853t-sl199  
SL199

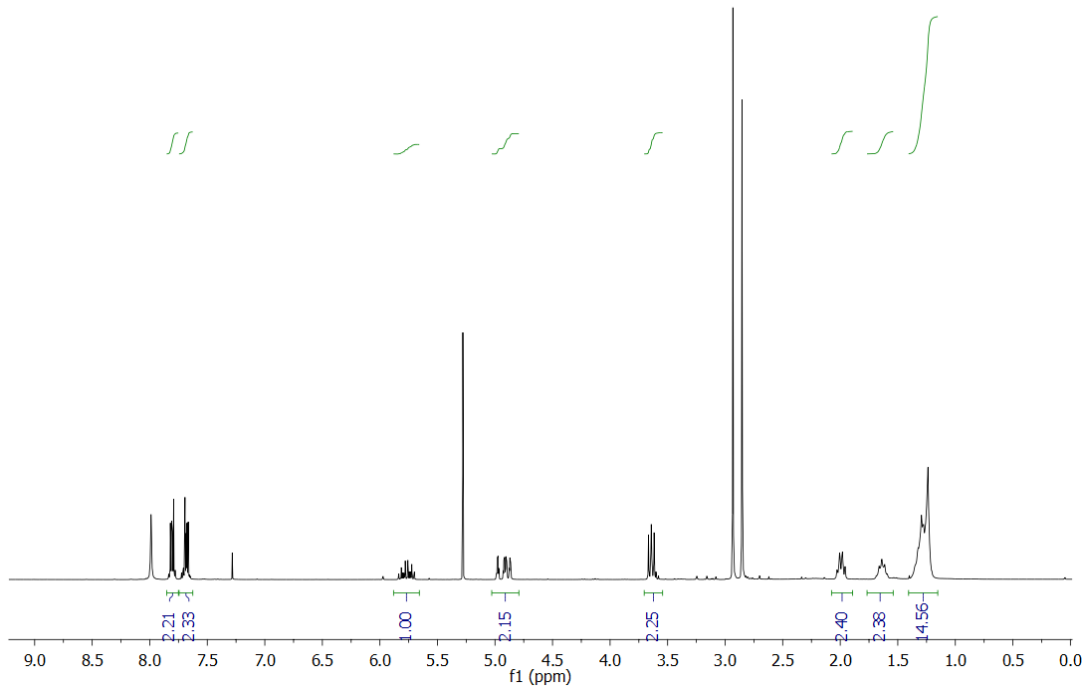

1909t-sl199  
SL199

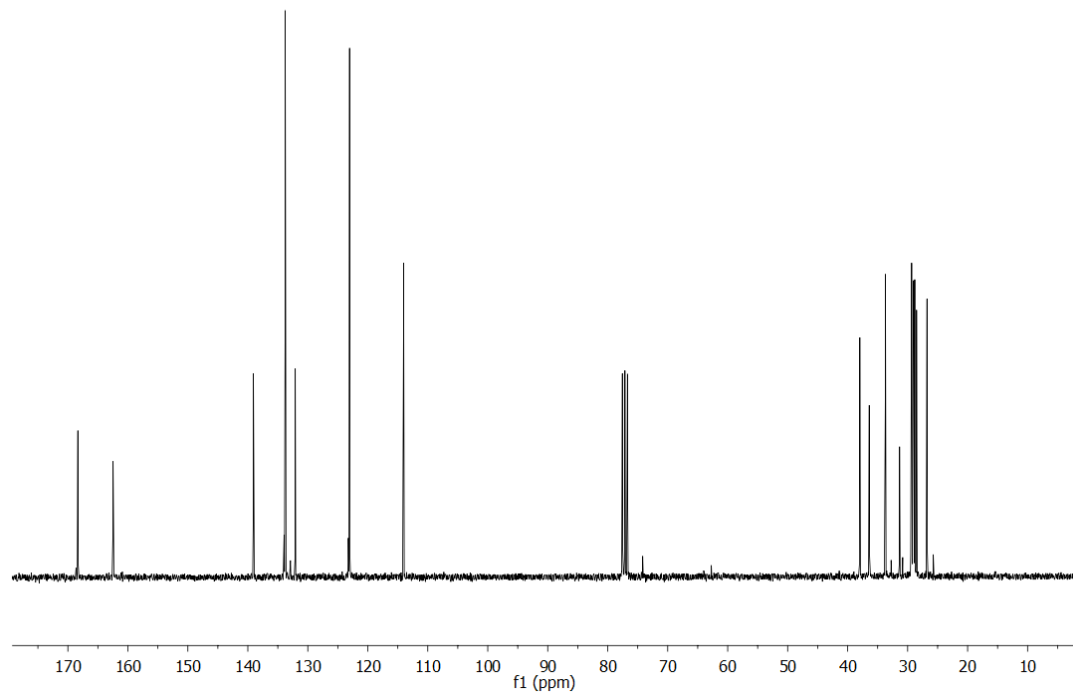



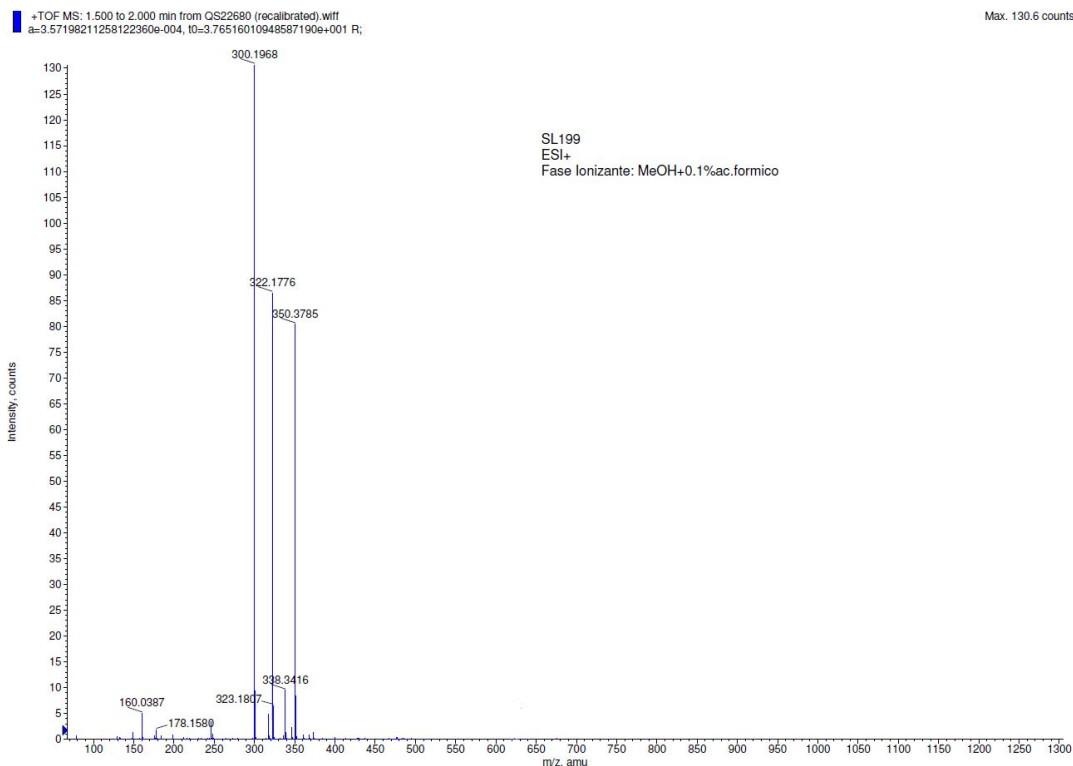

**Compound 8 a-c:** The previously obtained solid (5 g, 16.7 mmol) was dissolved in a mixture of THF/Ethanol (120 ml/120 ml), the hydrazine monohydrate (3.2 g, 100.2 mmol) was added and the reaction was heated at 83°C during 2h. The solvent was removed in vacuo and the residue was poured onto NaOH 1M (30ml). The mixture was extracted with DCM. The organic layer was dried with sodium sulfate and the solvent was removed in vacuo afforded a yellow oil 83-87% yield.

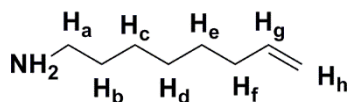

**Compound 8a:**  $^1\text{H}$  NMR (300 MHz,  $\text{CDCl}_3$ )  $\delta$  5.76 (m, 1 $H_g$ ), 5.17 (m, 2 $H_h$ ), 2.71 (t,  $J = 6.9$  Hz, 2 $H_a$ ), 2.11 (m, 2 $H_f$ ), 1.58 (m, 8 $H_{b, c, d, e}$ ).  $^{13}\text{C}$  NMR (75 MHz,  $\text{CDCl}_3$ )  $\delta$  138.98, 114.21, 42.08, 33.71, 33.51, 28.93, 28.86, 26.71. MS  $m/z$  calculated for  $\text{C}_8\text{H}_{17}\text{N}$  [ $\text{M}-\text{H}^+$ ] 128.14 found MALDI TOF 128.15.

93t-amina8  
Amina 8

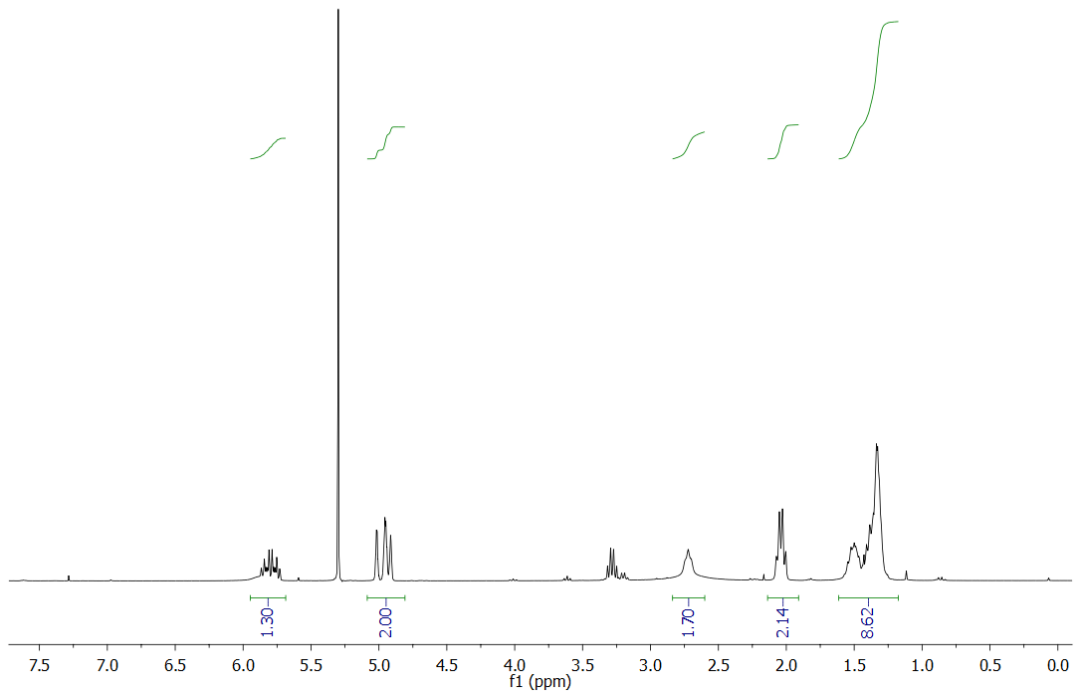

SLamina8  
SLamina8

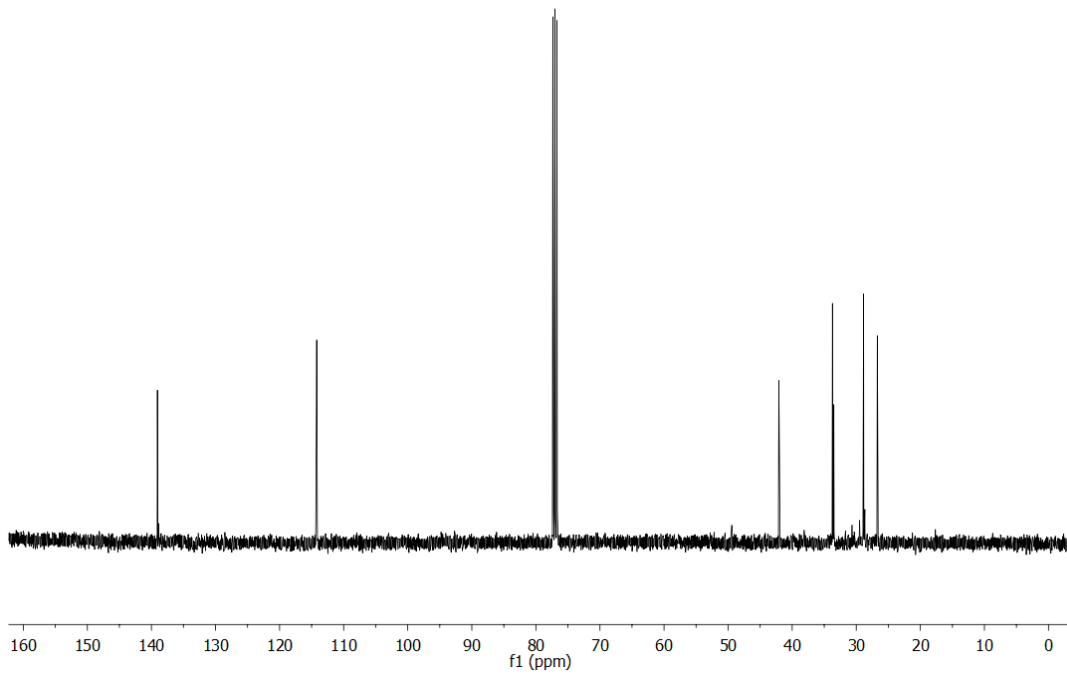

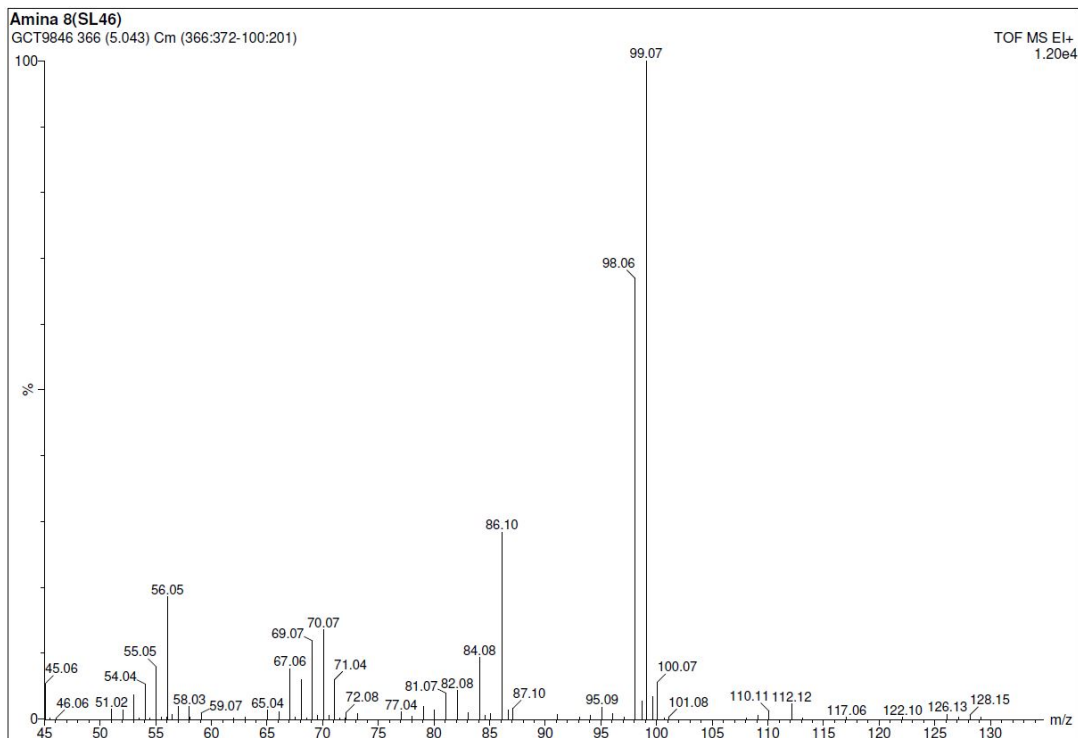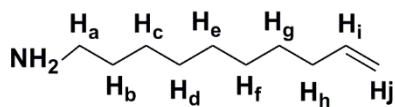

**Compound 8b:**  $^1\text{H}$  NMR (300 MHz,  $\text{CDCl}_3$ )  $\delta$  6.06 (m, 1 $\text{H}_i$ ), 5.13 (m, 2 $\text{H}_j$ ), 2.68 (t,  $J$ = 6.9 Hz, 2 $\text{H}_a$ ), 2.04 (m, 2 $\text{H}_h$ ), 1.58 (m, 12 $\text{H}_{c, d, e, f, g}$ ).  $^{13}\text{C}$  NMR (75 MHz,  $\text{CDCl}_3$ )  $\delta$  139.17, 114.09, 42.19, 33.77, 33.75, 29.44, 29.43, 29.06, 28.90, 26.86. MS  $m/z$  calculated for  $\text{C}_{10}\text{H}_{21}\text{N}$  [ $\text{M}-\text{H}^+$ ] 156.17 found MALDI TOF 156.17.

289t-amina10  
AMINA 10

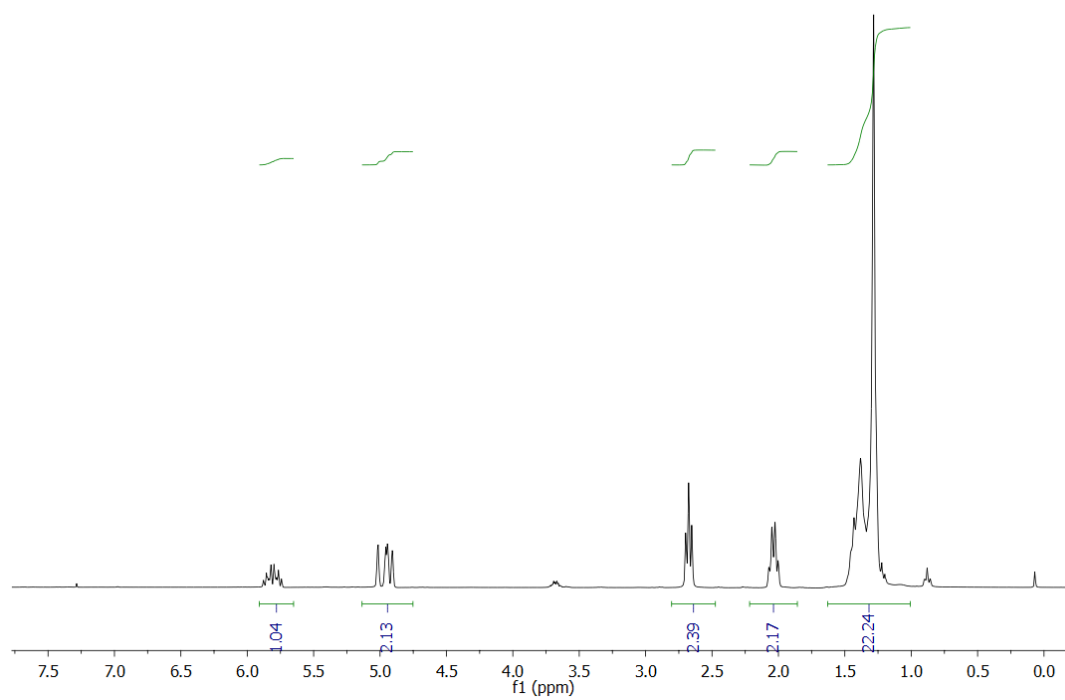

1618t-amina10  
Amina 10

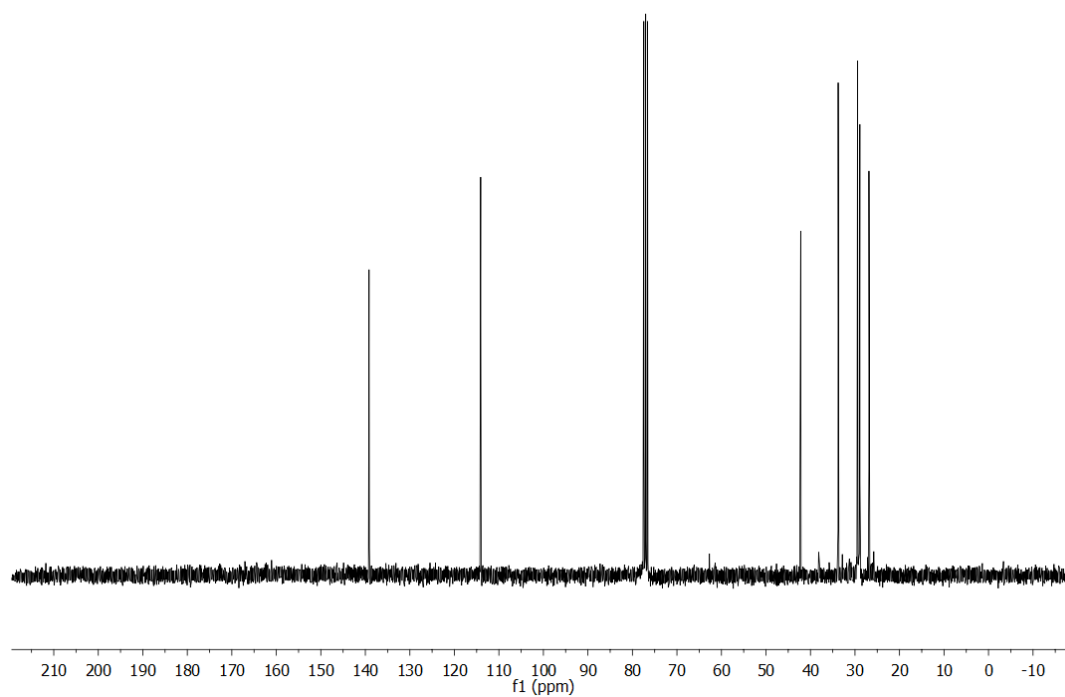

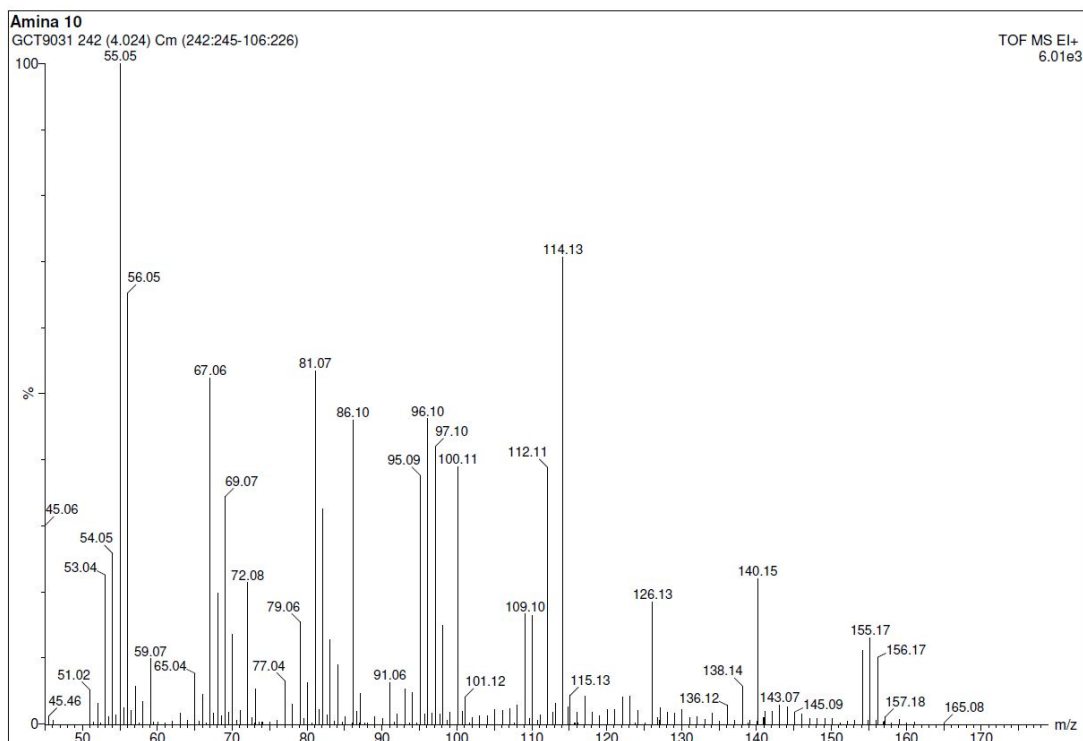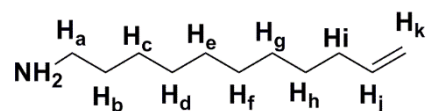

**Compound 8c:**  $^1\text{H}$  NMR (300 MHz,  $\text{CDCl}_3$ )  $\delta$  5.91 (m, 1 $H_j$ ), 5.06 (m, 2 $H_k$ ), 2.64 (t,  $J = 6,9$  Hz, 2 $H_b$ ), 2.05 (m, 2 $H_i$ ), 1.55 (m, 14 $H_{c, d, e, f, g, h}$ ).  $^{13}\text{C}$  NMR (75 MHz,  $\text{CDCl}_3$ )  $\delta$  139.14, 114.16, 40.07, 33.78, 29.37, 29.35, 29.06, 29.01, 28.91, 28.05, 26.55. MS  $m/z$  calculated for  $\text{C}_{11}\text{H}_{23}\text{N}$  [ $\text{M}-\text{H}^+$ ] 169.18 found MALDI TOF 169.18.

139t-amina11  
Amina11

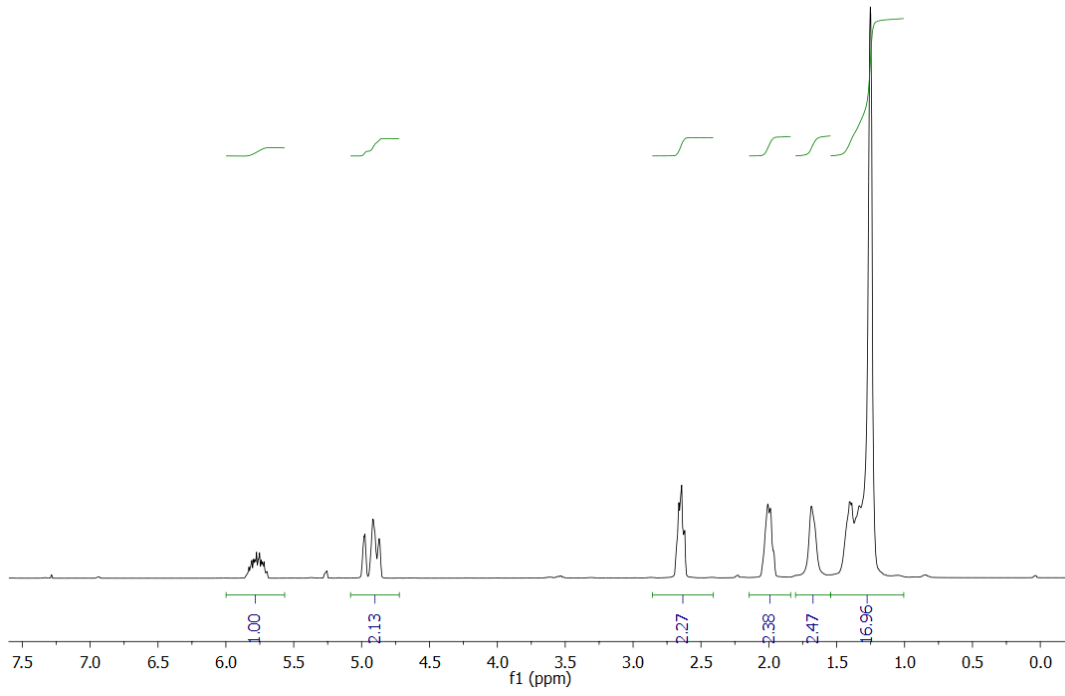

Slamina11  
Slamina11

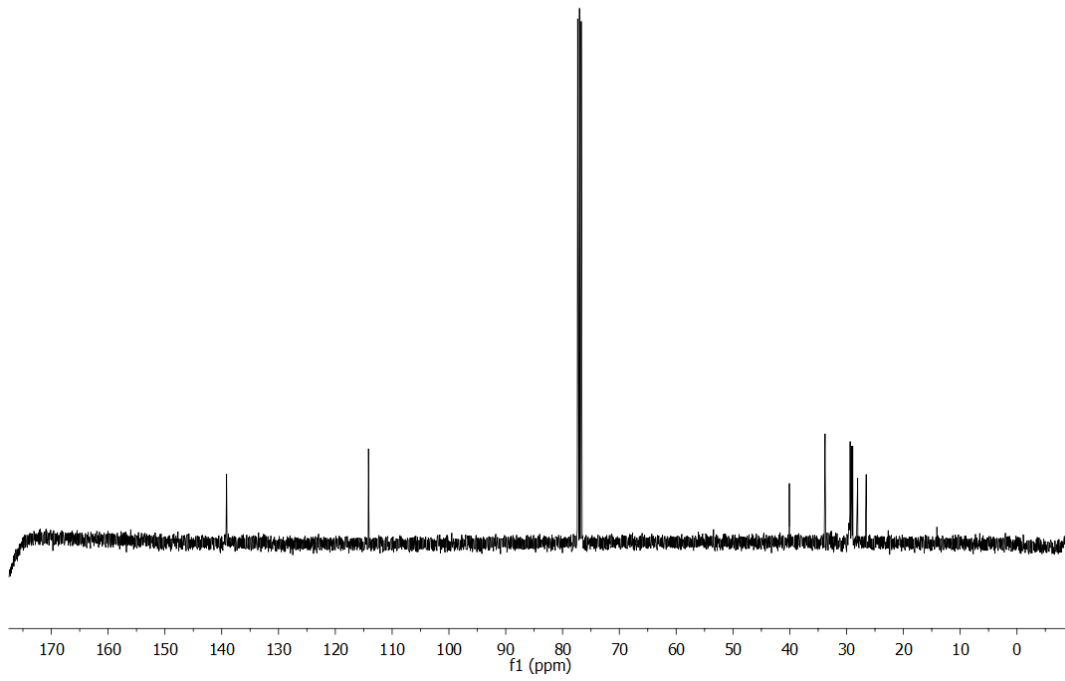

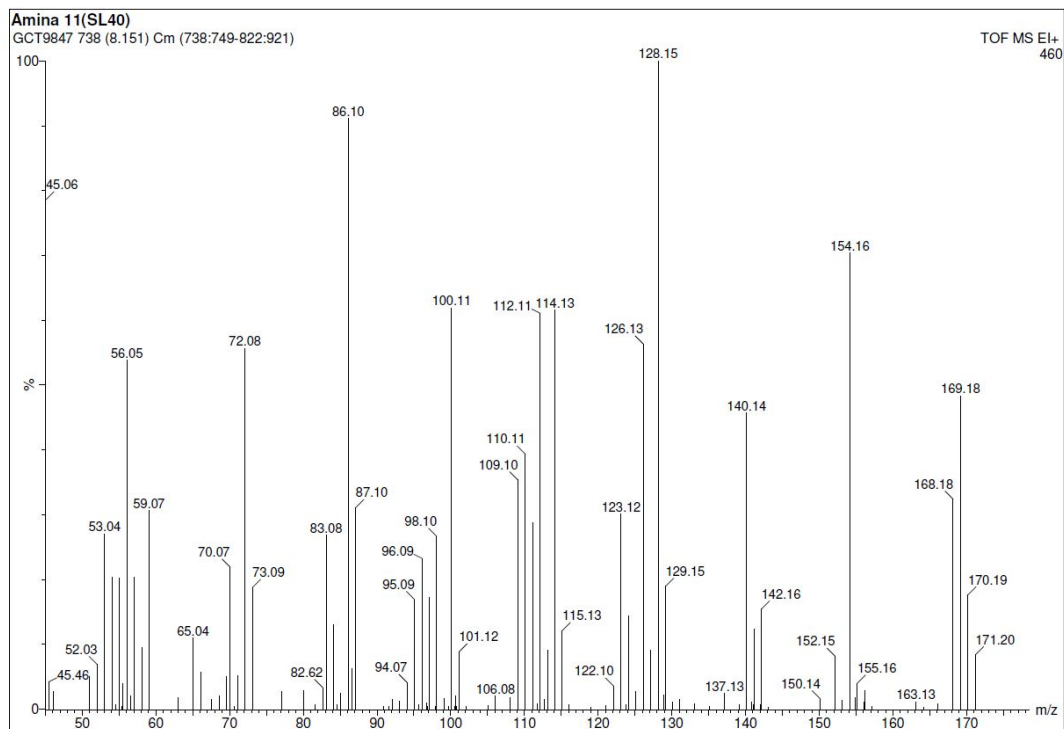

### General procedure synthesis aromatic spacer

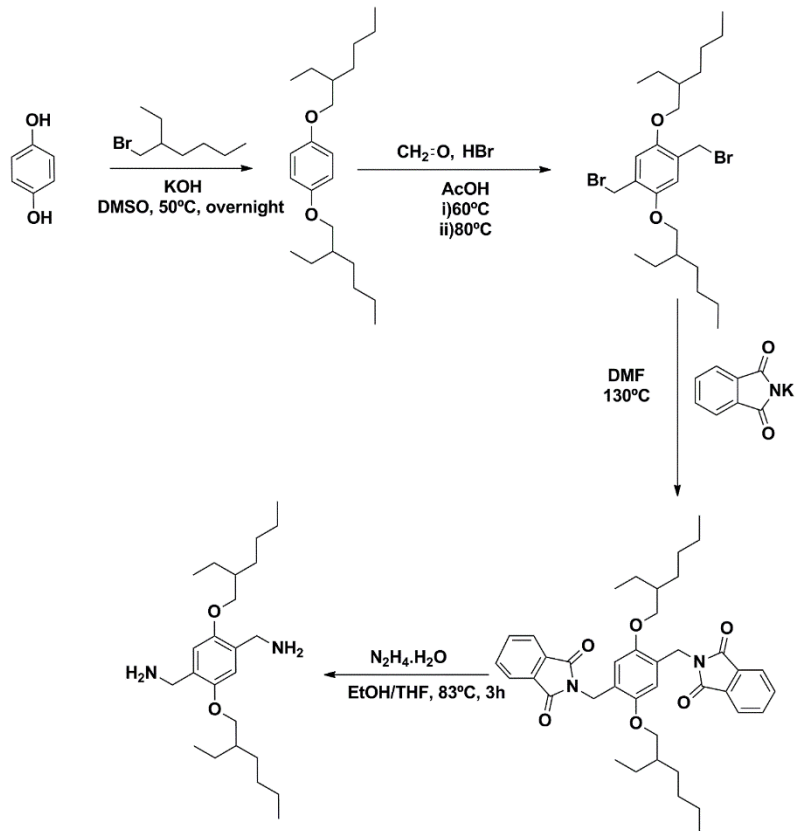

The compound 1, 4- Bis (2-ethyl-hexyloxy)-benzene and the 1, 4-Dibromo-2, 5-bis-(2-ethyl-hexyloxy)-benzene (II) were synthesized as described in Macromolecules **2012**, 45, 5051-5057.

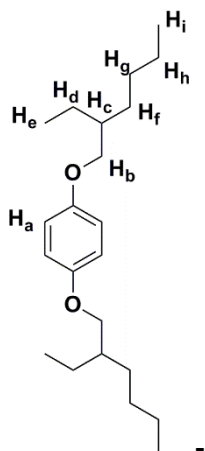

**Compound 9.** <sup>1</sup>H NMR (300 MHz, CDCl<sub>3</sub>) δ 6.82 (s, 4H<sub>a</sub>), 3.78 (dd, *J* = 5.8, 1.2 Hz, 4H<sub>b</sub>), 1.69 (sep, *J* = 6.1 Hz, 2H<sub>c</sub>), 1.28-1.54 (m, 16H<sub>d, e, f, g</sub>) 0.92 (m, 4H<sub>h</sub>). <sup>13</sup>C NMR (75 MHz, CDCl<sub>3</sub>) δ 153.43, 115.35, 71.20, 39.47, 30.53, 29.09, 23.86, 23.06, 14.08, 11.09. HR-MS *m/z* calculated for C<sub>22</sub>H<sub>38</sub>O<sub>2</sub> 334.2812 found HR-MS 334.2873.

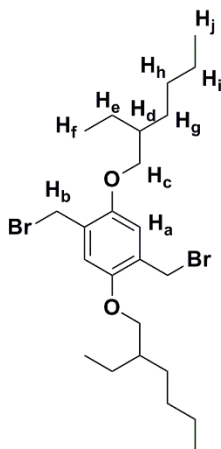



**Compound 10.**  $^1\text{H}$  NMR (300 MHz,  $\text{CDCl}_3$ , ppm)  $\delta$  6.85 (s, 2H<sub>a</sub>), 4.52 (s, 4H<sub>b</sub>), 3.87 (d,  $J = 5.4$  Hz, 4H<sub>c</sub>), 1.75 (sep,  $J = 6.2$  Hz, 2H<sub>d</sub>), 1.61 – 1.29 (m, 16H<sub>e, g, h, i</sub>), 0.97 – 0.89 (m, 12H<sub>f, j</sub>).  $^{13}\text{C}$  NMR (75 MHz,  $\text{CDCl}_3$ )  $\delta$  150.69, 127.36, 114.21, 70.91, 39.59, 30.62, 29.10, 28.73, 24.01, 23.04, 14.08, 11.23. MS  $m/z$  calculated for  $\text{C}_{24}\text{H}_{40}\text{Br}_2\text{O}_2$  518.139 found MALDI TOF 518.139.

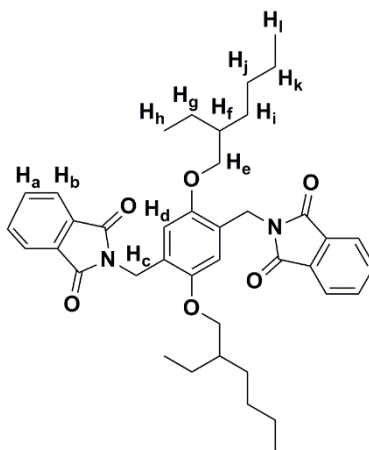

**Compound 11** : the previously product (5g, 9.6 mmol) and the potassium phthalamide (7g, 38.4mmol) were charged in a flask  $N,N$ -dimethylformamide (80 ml) was added and the reaction was heated at  $100^\circ\text{C}$  during 2h. The solution was then allowed to come back to room temperature and filtered over celite and the filtrate concentrate in vacuo to give a pale white solid (80%).  $^1\text{H}$  NMR (300 MHz,  $\text{CDCl}_3$ )  $\delta$  7.82 – 7.68 (m, 8H<sub>a,b</sub>), 6.77 (s, 2H<sub>d</sub>), 4.85 (s, 4H<sub>c</sub>), 3.77 (m, 4H<sub>e</sub>), 1.75 (sep,  $J = 6.2$  Hz, 2H<sub>f</sub>), 1.61 (m, 16H<sub>g,i,j,k</sub>), 0.97 (m, 12H<sub>h,l</sub>).  $^{13}\text{C}$  NMR (75 MHz,  $\text{CDCl}_3$ )  $\delta$  168.09, 151.79, 150.59, 133.97, 133.66, 124.95, 124.46, 123.35, 123.02, 113.29, 111.12, 71.41, 39.52, 37.17, 35.40, 30.54, 29.16, 23.94, 23.17, 14.22, 11.22. MS  $m/z$  calculated for  $\text{C}_{40}\text{H}_{48}\text{N}_2\text{O}_6$   $[\text{M} + \text{Na}^+]$  675.3410 found HR-MS 675.3434.

SL625

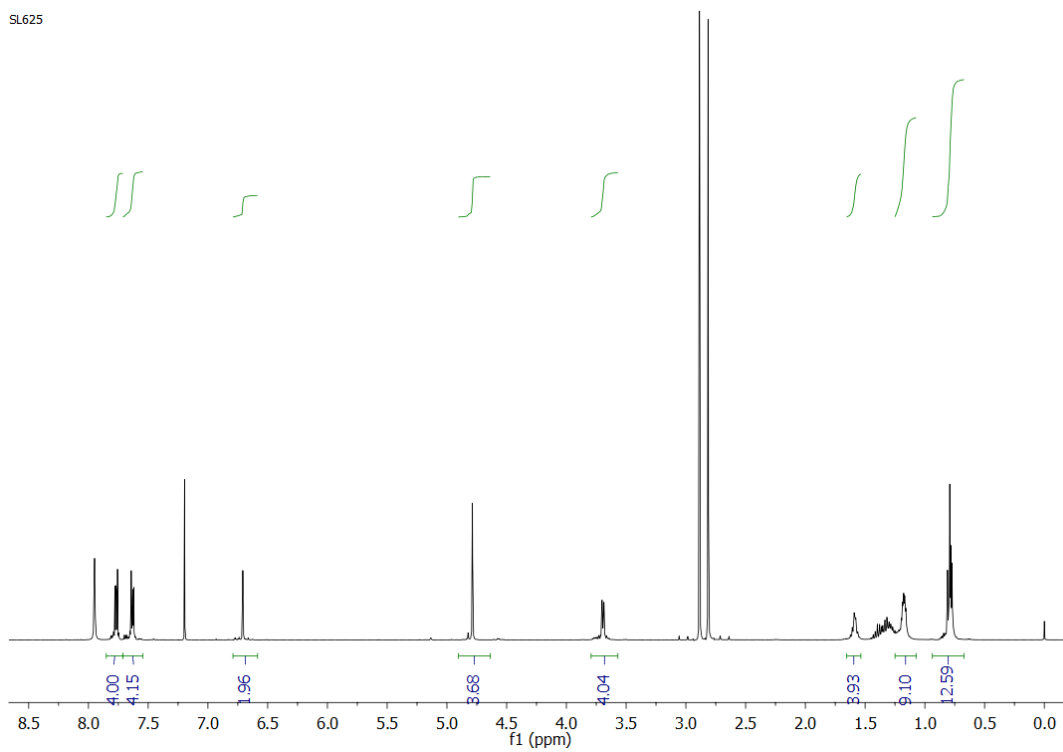

36741-s25  
SL25

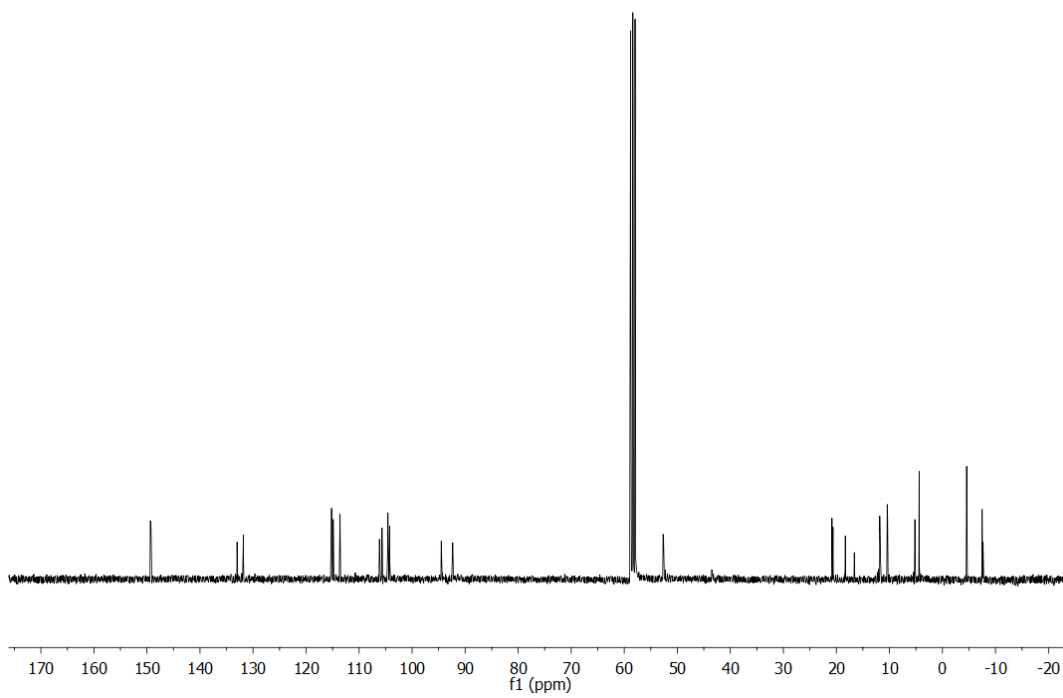

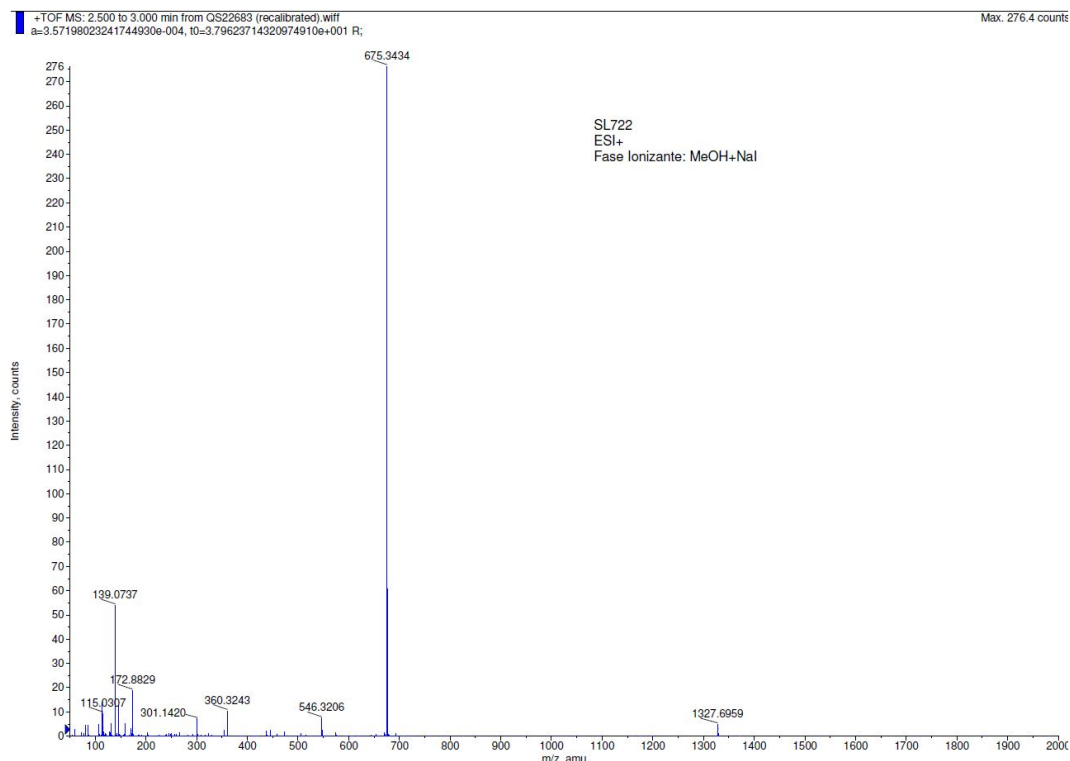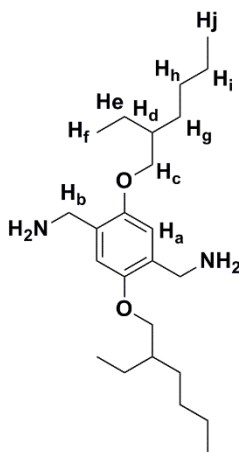

**Compound 12:** The previously obtained solid (4g, 6.1mmol) was dissolved in a mixture of THF/Ethanol (15ml/15ml), the hydrazine monohydrate (2,5g, 79.3 mmol) was added and the reaction was heated at 83°C during 2h. The solvent was removed in vacuo and the residue was poured onto NaOH 1M (30ml). The mixture was extracted with DCM. The organic layer was dried with sodium sulfate and the solvent was removed in vacuo afforded 3,4 mg of a brown oil (92%).

$^1\text{H}$  NMR (300 MHz,  $\text{CDCl}_3$ )  $\delta$  6.68 (s, 2H<sub>1</sub>), 3.87 (m, 4H<sub>c</sub>), 3.74 (s, 4H<sub>b</sub>), 1.75 (sep, J = 6.2 Hz, 2H<sub>d</sub>), 1.61 – 1.29 (m, 16H<sub>e,g,h,i</sub>), 0.97 – 0.89 (m, 12H<sub>f,j</sub>).  $^{13}\text{C}$  NMR (75 MHz,  $\text{CDCl}_3$ )  $\delta$  151.25, 150.14, 130.77, 12.20, 110.41, 70.66, 67.91, 42.71, 39.61, 30.72, 29.09, 25.58, 24.12, 23.02, 14.04, 11.17. MS m/z calculated for  $\text{C}_{24}\text{H}_{44}\text{N}_2\text{O}_2$  392.34 found MALDI TOF 392.4.

SL633

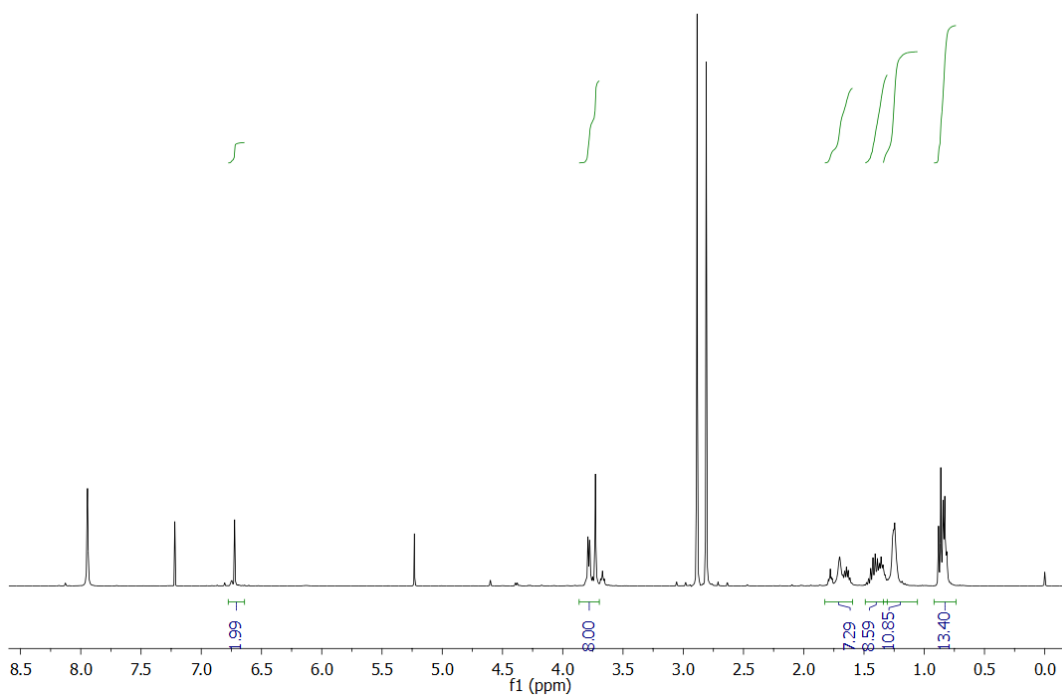

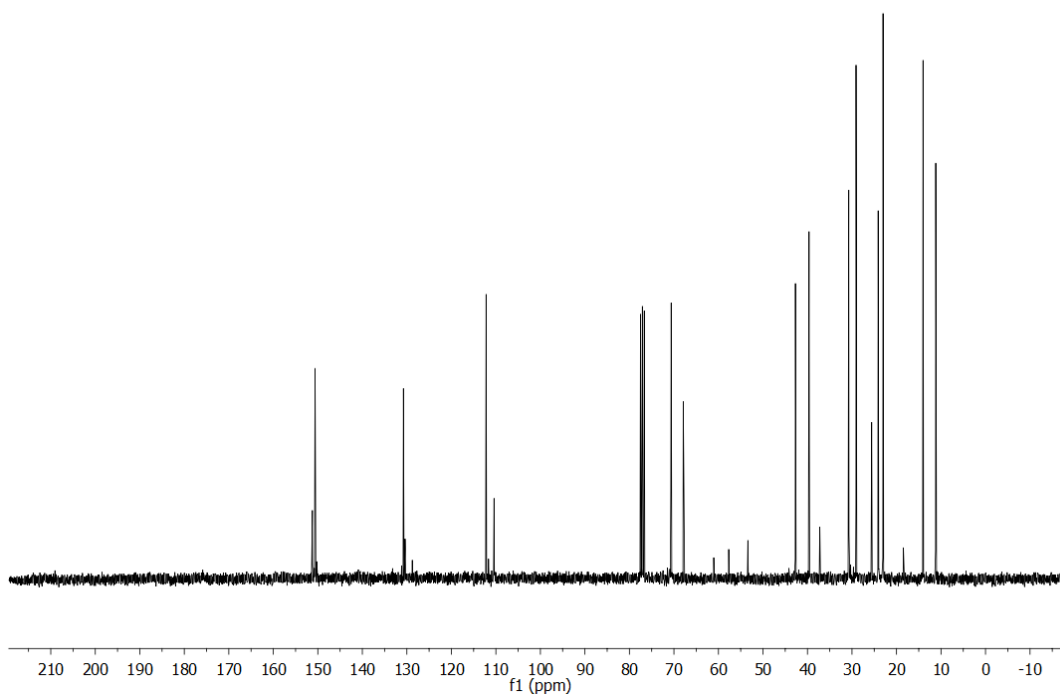

### General procedure Synthesis linear receptor

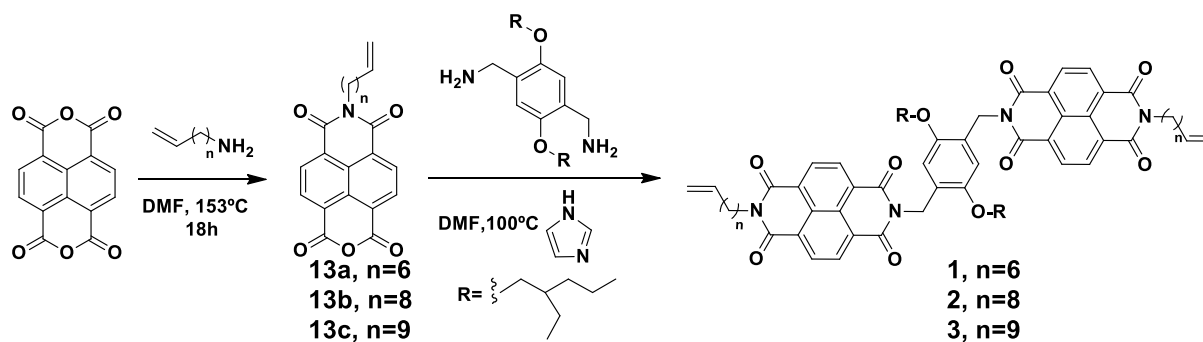

The compounds **13 a-c** were synthesized as described in J. Phys. Chem. **2001**, 105, 7216-7219.

**Compound 13 a-c:**

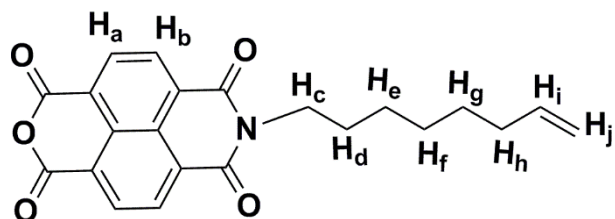

**Compound 13a:**  $^1\text{H NMR}$  (300MHz,  $\text{CDCl}_3$ )  $^1\text{H NMR}$   $\delta$  8.83 (s, 4H,  $\text{H}_a, \text{b}$ ), 5.65 (m, 1H,  $\text{H}_i$ ), 4.97 (m, 2H,  $\text{H}_i$ ), 4.17 (m, 2H,  $\text{H}_c$ ), 2.08 (m, 2H,  $\text{H}_h$ ), 1.76 (m, 2H,  $\text{H}_d$ ), 1.33 (m, 6H,  $\text{H}_e, \text{f}, \text{g}$ ),  $^{13}\text{C NMR}$  (75 MHz,  $\text{CDCl}_3$ )  $\delta$  162.04 (C=O), 158.51 (C=O), 139.11, 133.13, 130.80, 128.77, 127.91, 126.84, 122.81, 114.01, 41.15, 33.64, 28.50, 27.95, 26.88. MS  $m/z$  calculated for  $\text{C}_{22}\text{H}_{19}\text{NO}_5$  377.1 found MALDI TOF 377.2.

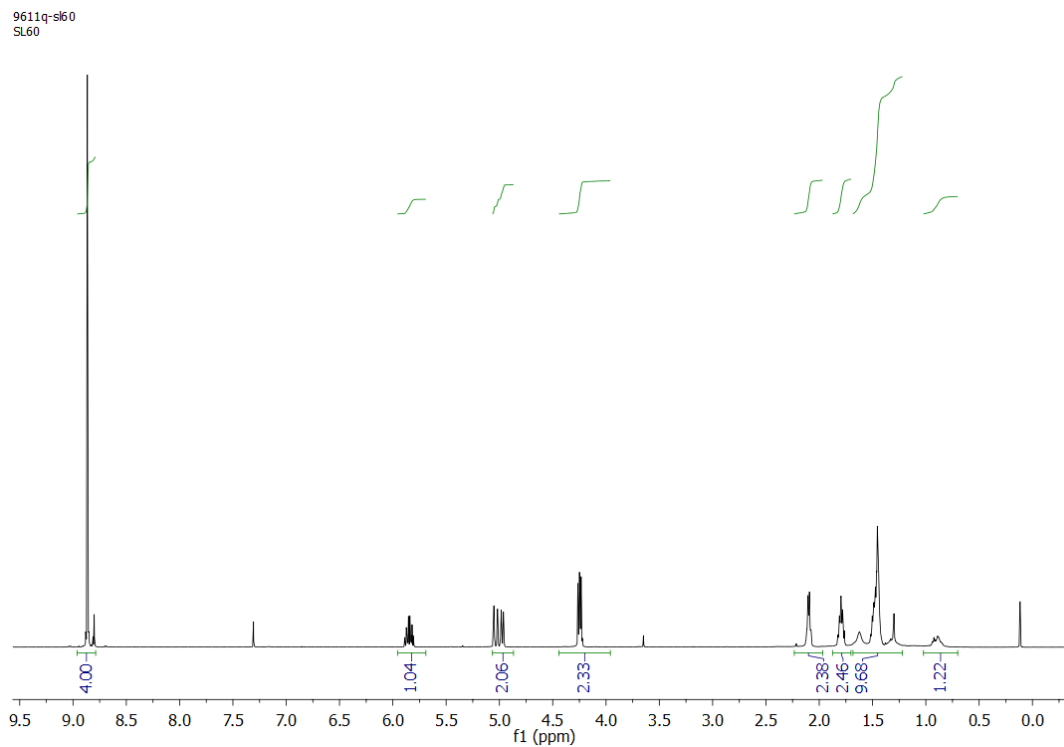

339t-s53  
SL53

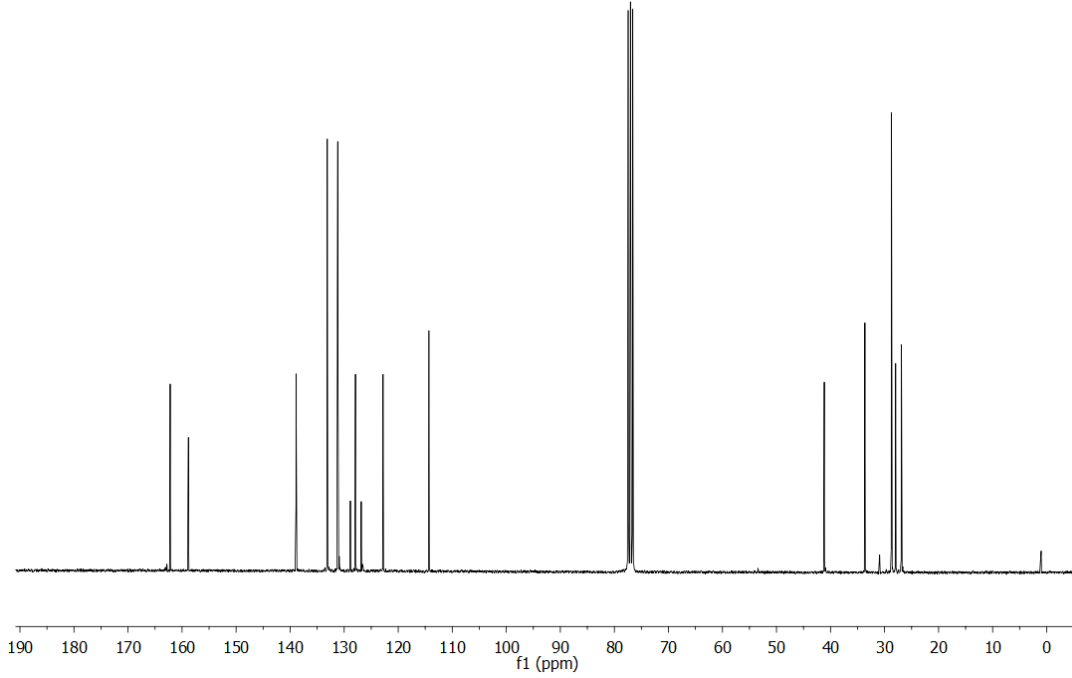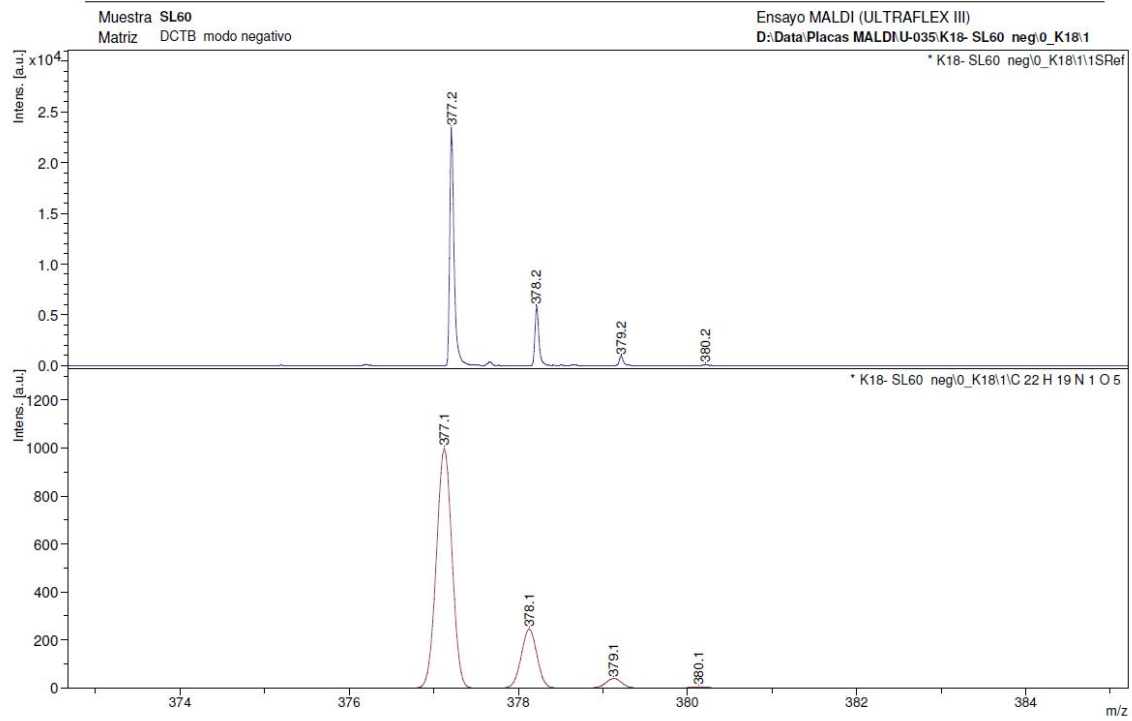

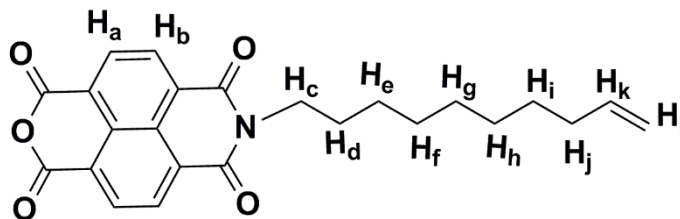

**Compound 13b:**  $^1\text{H}$  NMR (300 MHz,  $\text{CDCl}_3$ )  $\delta$  8.84 (s, 4 $\text{H}_{\text{a,b}}$ ), 5.83 (m, 1 $\text{H}_{\text{k}}$ ), 4.83 (m, 2 $\text{H}_{\text{l}}$ ), 4.22 (m, 2 $\text{H}_{\text{c}}$ ), 2.06 (m, 2 $\text{H}_{\text{j}}$ ), 1.77 (m, 2 $\text{H}_{\text{d}}$ ), 1.36 (m, 10 $\text{H}_{\text{e,f,g,h,i}}$ ).  $^{13}\text{C}$  NMR (75 MHz,  $\text{CDCl}_3$ )  $\delta$  162.18 (C=O), 158.82 (C=O), 139.13, 133.13, 131.18, 128.86, 127.93, 126.84, 122.80, 114.15, 53.42, 41.19, 33.75, 28.00, 27.02. HR-MS  $m/z$  calculated for  $\text{C}_{24}\text{H}_{23}\text{NO}_5$  405.1576 found HR-MS 406.1657.

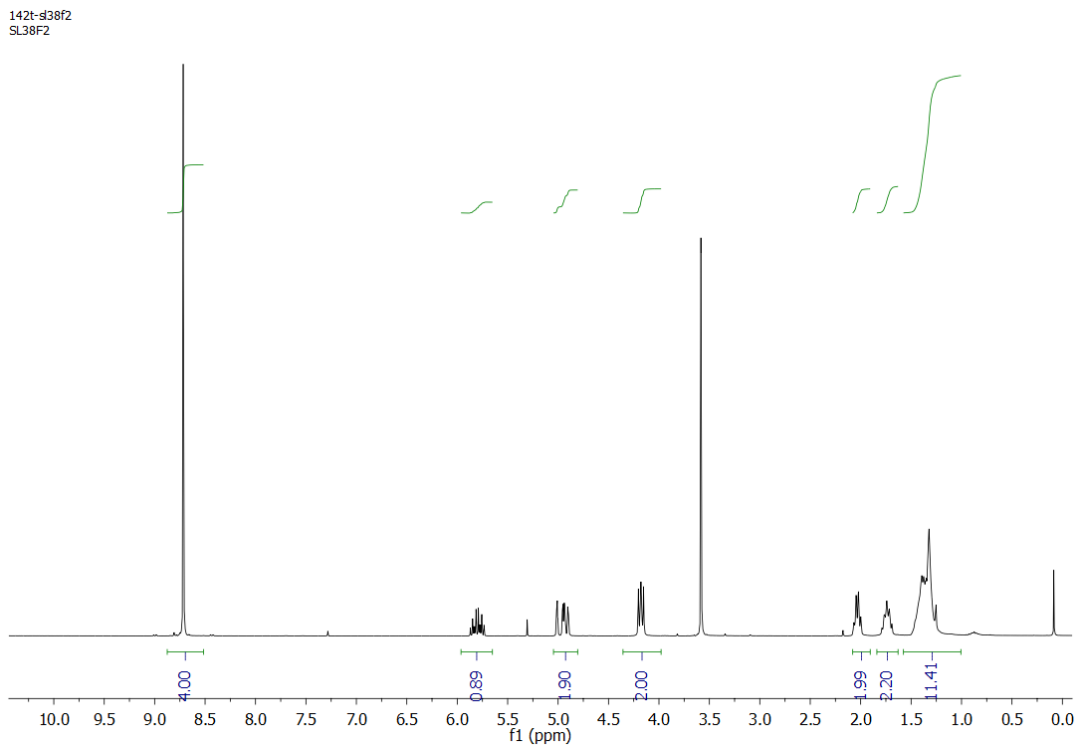



9548q-s55  
SL55

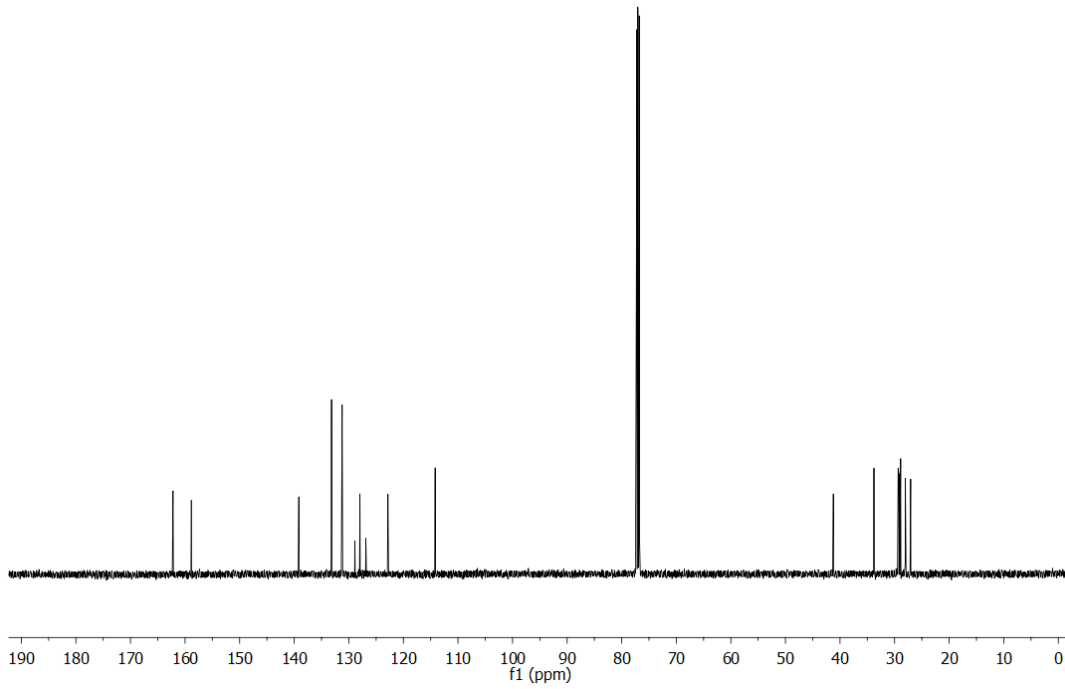

+TOF MS: 1.000 to 1.500 min from QS22638 (recalibrated).wiff  
a=3.57197770144776800e-004, l0=3.92039580557093220e+001 R;

Max. 101.8 counts.

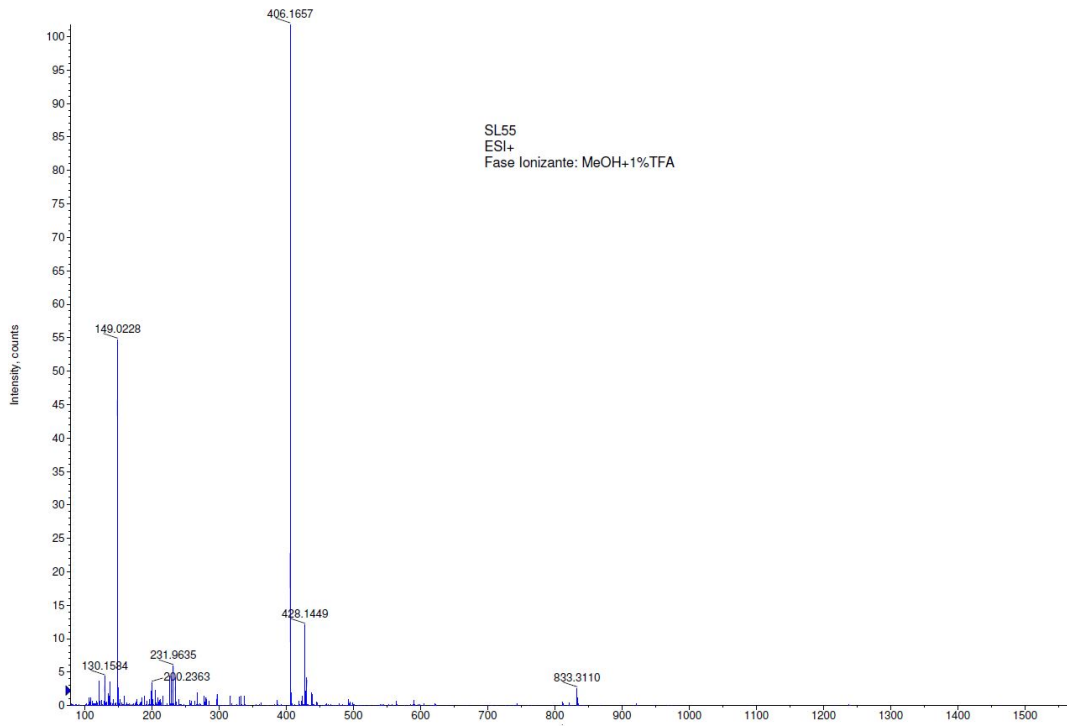

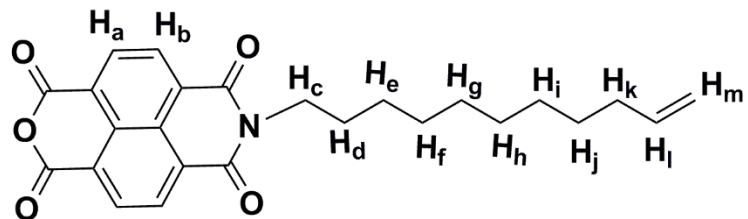

**Compound 13c:**  $^1\text{H}$  NMR (300 MHz,  $\text{CDCl}_3$ )  $\delta$  8.98 (s, 8 $\text{H}_{a,b}$ ), 5.81 (m, 1 $\text{H}_l$ ), 4.84 (m, 2 $\text{H}_m$ ), 4.21 (m, 2 $\text{H}_c$ ), 2.09 (m, 2 $\text{H}_k$ ), 1.75 (m, 2 $\text{H}_d$ ), 1.53 (m, 12 $\text{H}_{e, f, g, h, i, j}$ ),  $^{13}\text{C}$  NMR (75 MHz,  $\text{CDCl}_3$ )  $\delta$  162.35 (C=O), 158.83 (C=O), 139.09, 133.12, 131.18, 128.79, 127.92, 126.83, 122.80, 114.01, 41.19, 33.77, 30.90, 29.39, 29.24, 29.06 (s), 28.88 (s), 28.00, 27.02. HR-MS  $m/z$  calculated for  $\text{C}_{25}\text{H}_{25}\text{NO}_5$  419.1733 found HR-MS 420.1789.

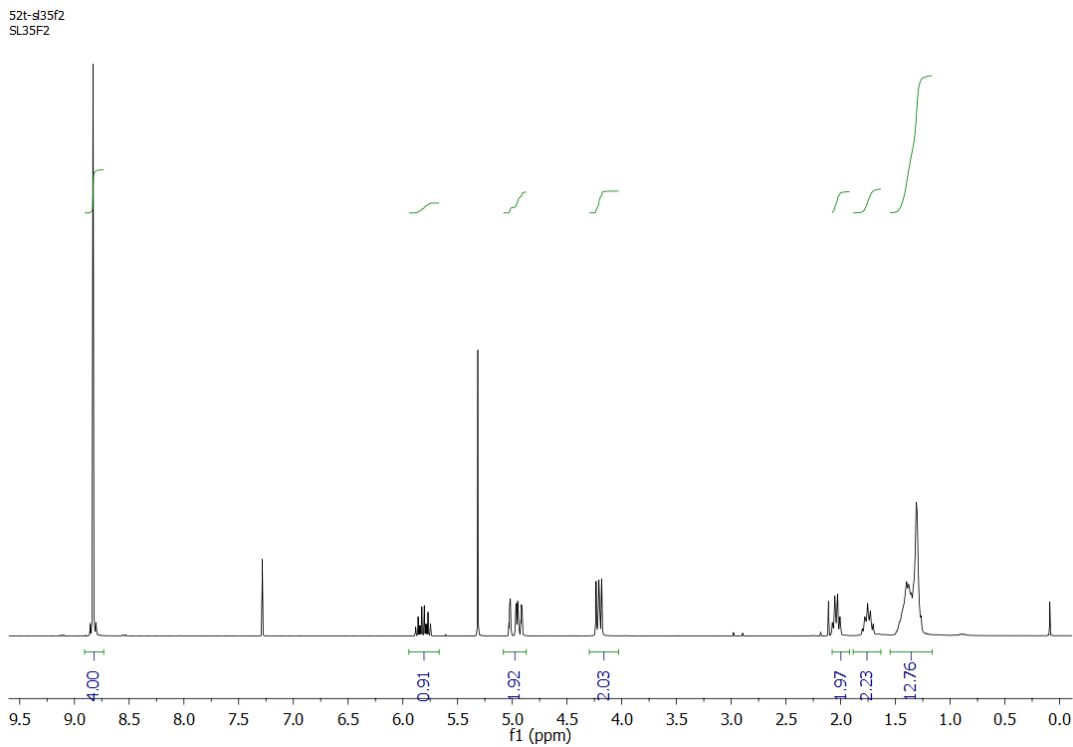

70t-d35  
SL35

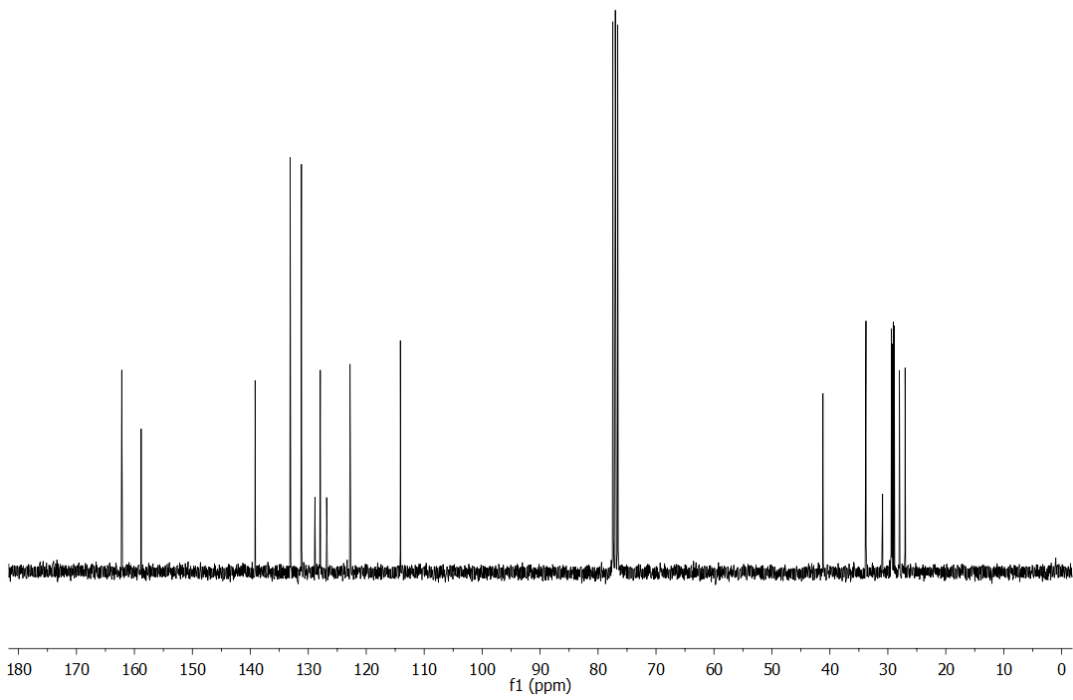

+TOF MS: 2.000 to 2.500 min from QS22640 (recalibrated).wiff  
a=-3.57196432097549800e-004, t0=-3.9193229968863640e+001 R;

Max. 56.8 counts

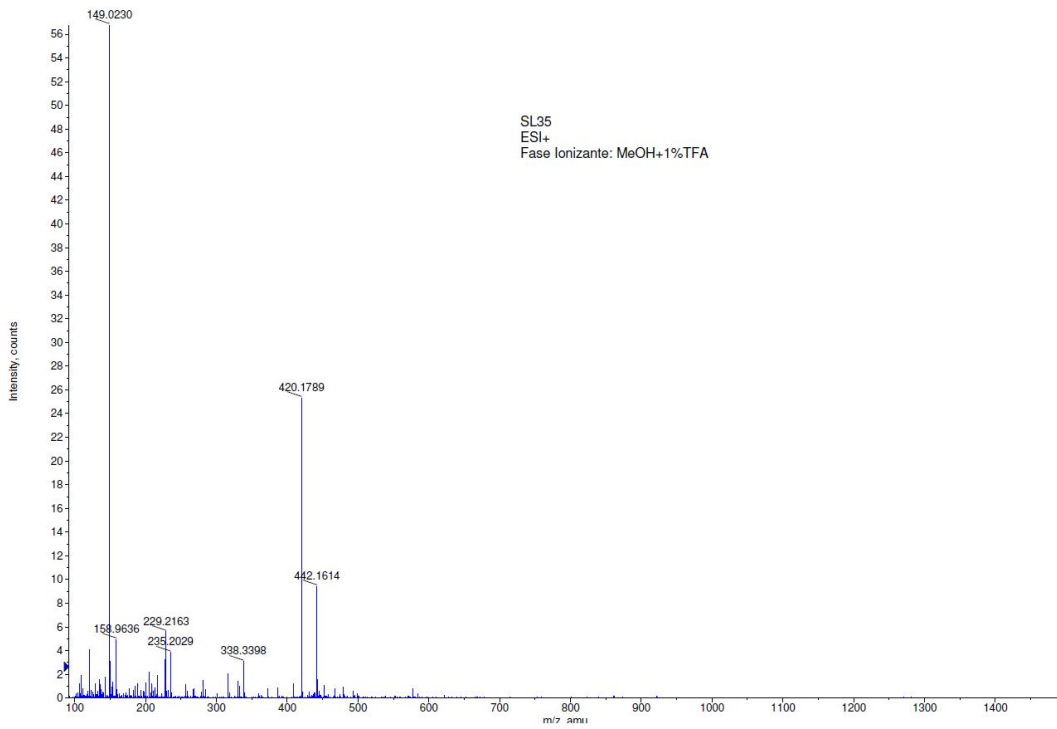

**Compound 1-3:** The previously obtained solid (200 mg, 0.47 mmol) was dissolved N, N-dimethylformamide (8ml), the imidazole (630 mg, 9.4 mmol) and the compound **12** (92mg, 0.23mmol) were added and the mixture was stirred at 130<sup>0</sup>C during 5 h. The reaction was cooled to room temperature and it was poured onto HCl 1M. The solid was filtered and the crude was purified by Flash chromatography on silica (eluent: DCM) afforded a pink solid (76-80 %).

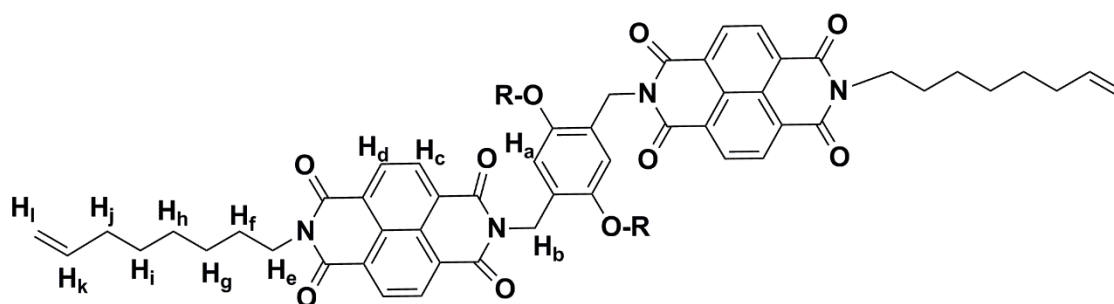

**Compound 1:** <sup>1</sup>H NMR (300 MHz, CDCl<sub>3</sub>) δ 8.54 (m, 8H, H<sub>c,d</sub>), 6.77 (s, 2H, H<sub>a</sub>), 5.82 (m, 2H, H<sub>k</sub>), 5.40 (s, 4H, H<sub>b</sub>), 4.97 (m, 4H, H<sub>i</sub>), 4.42 (t, J = 5.6 Hz, 4H, H<sub>e</sub>), 3.73 (m, 4H, H<sub>R</sub>), 2.04 (m, 2H, H<sub>j</sub>), 1.71 (m, 2H, H<sub>f</sub>), 1.58 (m, 16H, H<sub>R</sub>), 1.26 (m, 24H, H<sub>g,h,i</sub>), 0.81 (12H, H<sub>R</sub>) <sup>13</sup>C NMR (75 MHz, CDCl<sub>3</sub>) δ 162.80 (C=O), 162.68 (C=O), 150.76, 138.95, 131.04, 130.92, 126.71, 126.66, 124.47, 114.28, 112.81, 77.43, 77.21, 77.01, 76.59, 71.48, 40.94, 39.75, 39.48, 33.66, 30.39, 28.99, 28.75, 28.02, 26.92, 23.73, 22.98, 14.02, 11.13. HR-MS m/z calculated for C<sub>68</sub>H<sub>23</sub>N<sub>4</sub>O<sub>10</sub> 1110.5718 found HR-MS 1110.5882. ε (λ<sub>max</sub>=380) = 25555 M<sup>-1</sup>cm<sup>-1</sup>.

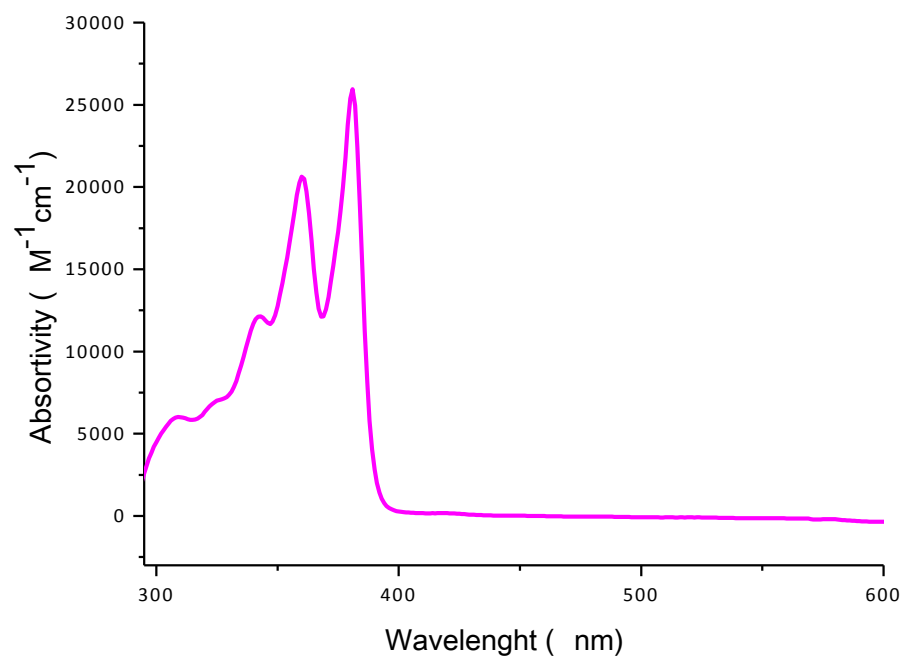

1235t-sl165  
SL165

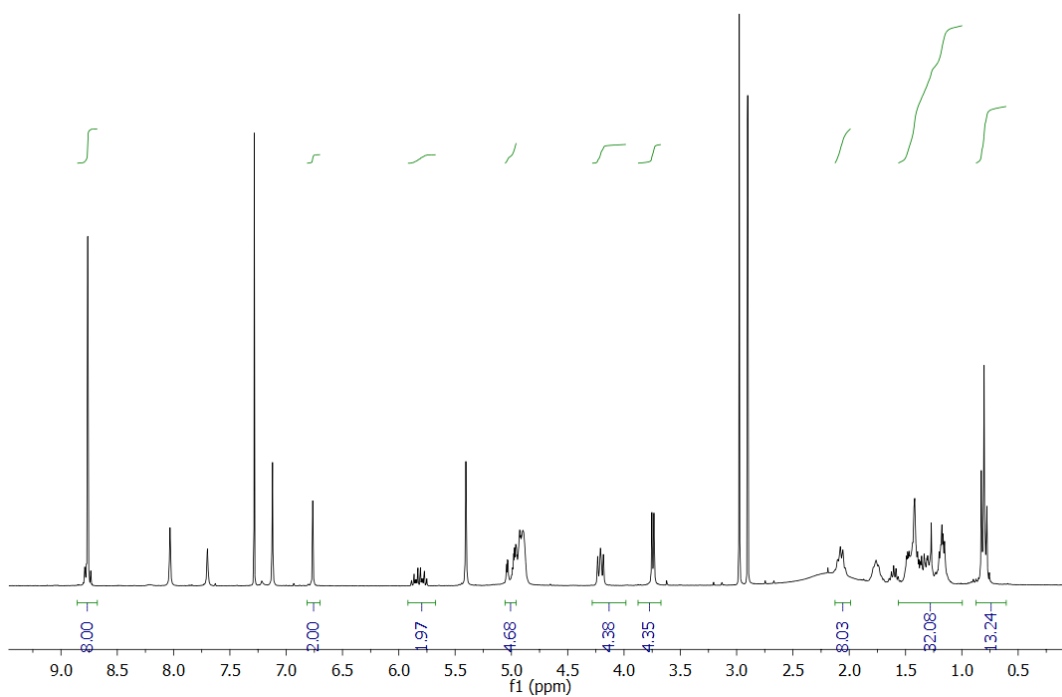

1553t-sl145  
SL145

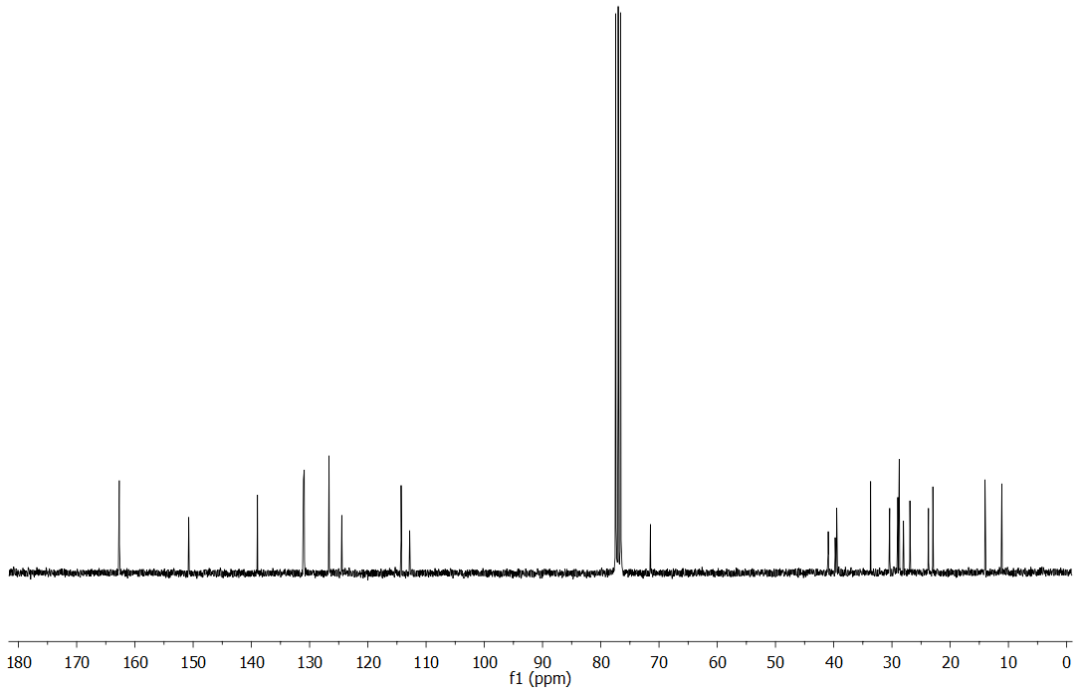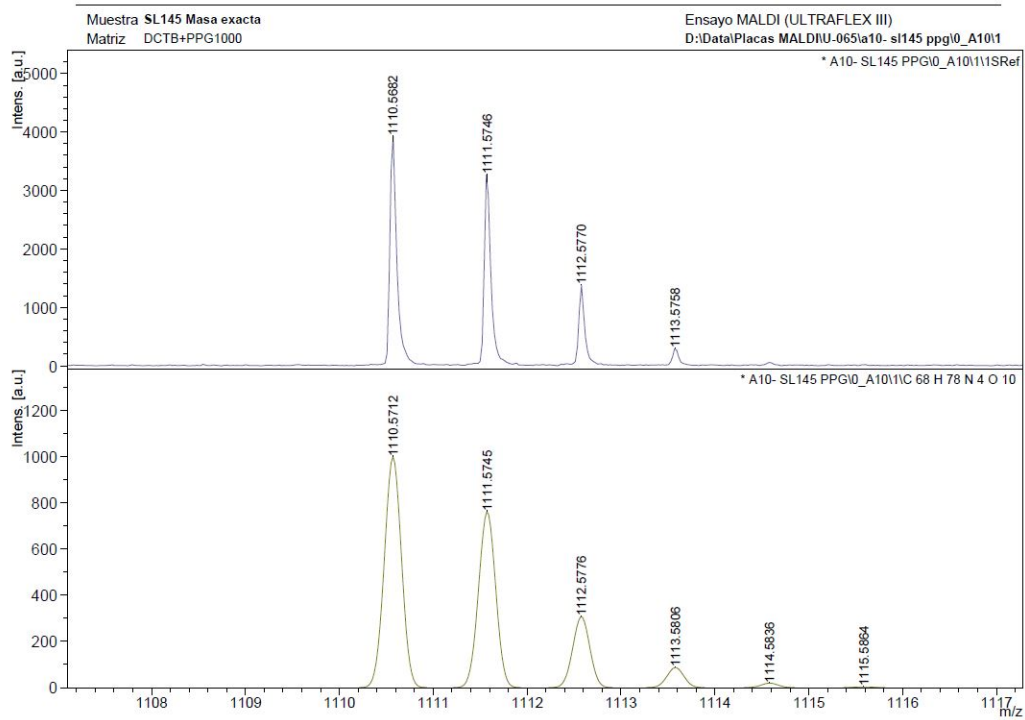

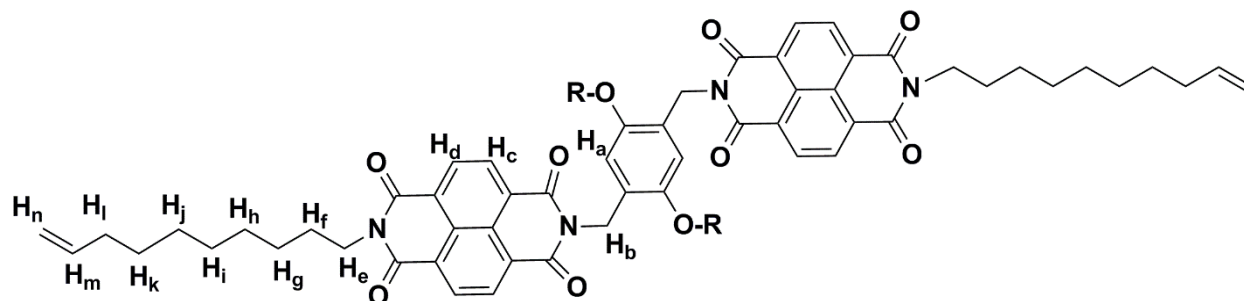

**Compound 2:**  $^1\text{H}$  NMR (300 MHz,  $\text{CDCl}_3$ )  $\delta$  8.79 (m, 8H,  $\text{H}_{c,d}$ ), 6.79 (s, 2H,  $\text{H}_a$ ), 5.85 (m, 2H,  $\text{H}_m$ ), 5.43 (s, 4H,  $\text{H}_b$ ), 4.84 (m, 4H,  $\text{H}_n$ ), 4.29 (d,  $J = 5.6$  Hz, 4H,  $\text{H}_e$ ), 3.65 (m, 4H,  $\text{H}_R$ ), 2.08 (m, 2H,  $\text{H}_i$ ), 1.78 (m, 2H,  $\text{H}_f$ ), 1.57 (m, 16H,  $\text{H}_R$ ), 1.28 (m, 24H,  $\text{H}_{g,h,i,j,k}$ ), 0.84 (12H,  $\text{H}_R$ ).  $^{13}\text{C}$  NMR (75 MHz,  $\text{CDCl}_3$ )  $\delta$  162.83 (C=O), 162.71 (C=O), 150.78, 139.18, 131.01, 127.57, 125.83, 124.49, 114.16, 112.82, 71.50, 41.00, 39.77, 39.50, 33.79, 30.41, 29.36, 29.27, 29.06, 29.01, 28.89, 28.09, 27.08, 23.75, 23.00, 14.05, 11.15. HR-MS  $m/z$  calculated for  $\text{C}_{72}\text{H}_{86}\text{N}_4\text{O}_{10}$  1166. 6344 found HR-MS 1166.6338.  $\epsilon$  ( $\lambda_{\text{max}}=380\text{nm}$ ) =  $22399 \text{ M}^{-1}\text{cm}^{-1}$ .

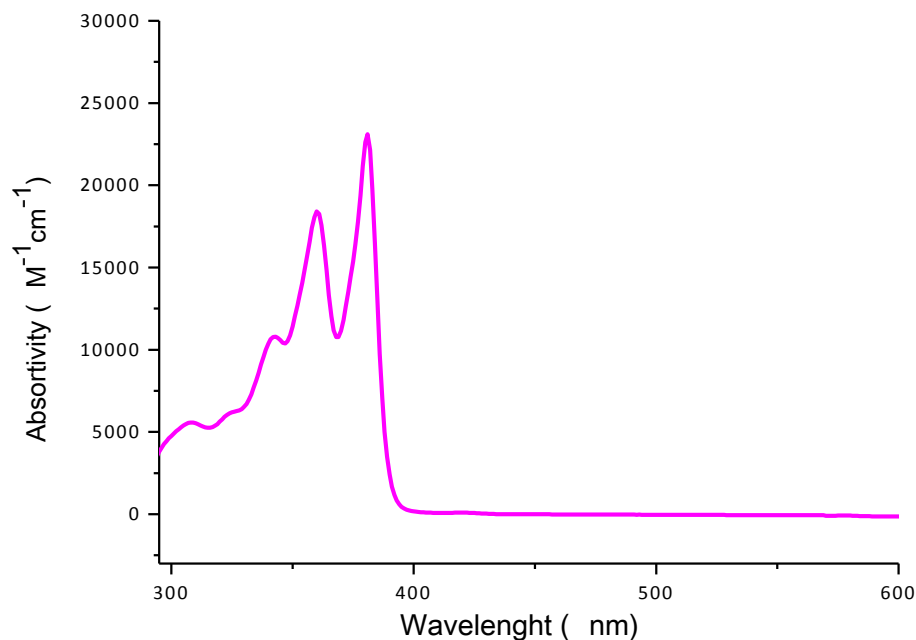

9495q-sl65  
SL 65

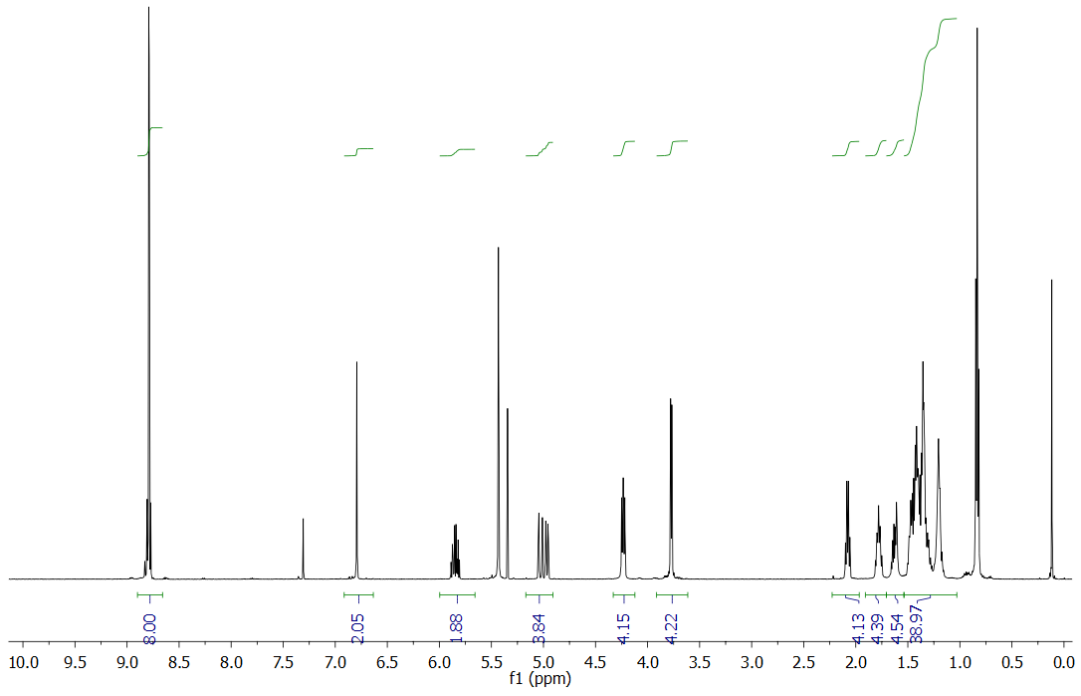

9522q-sl65  
SL65

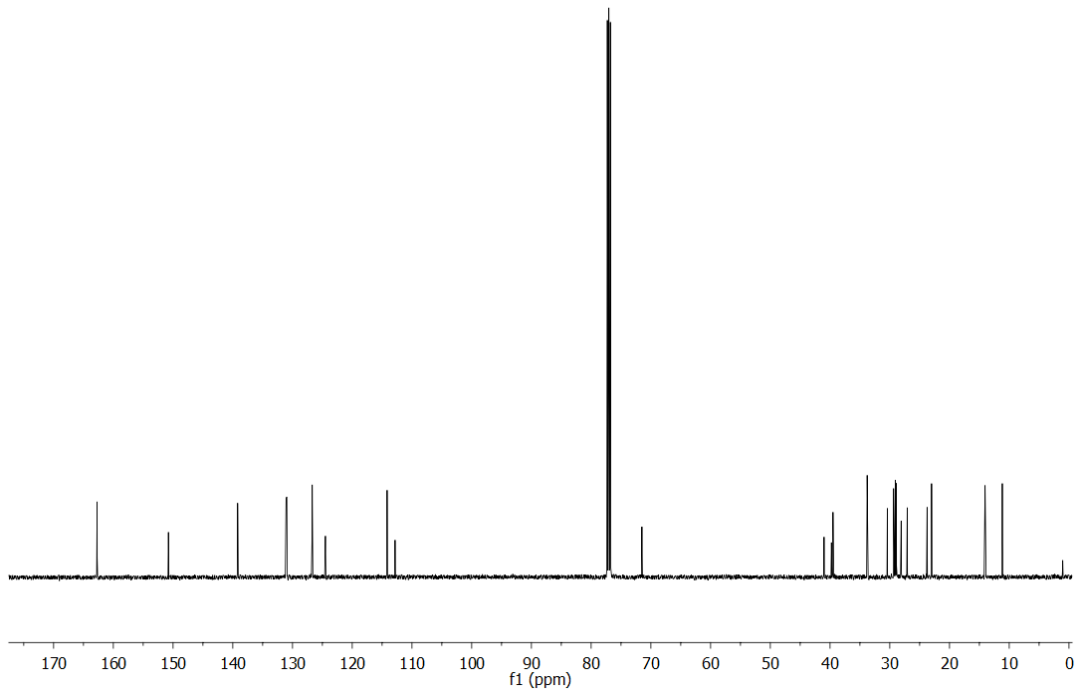



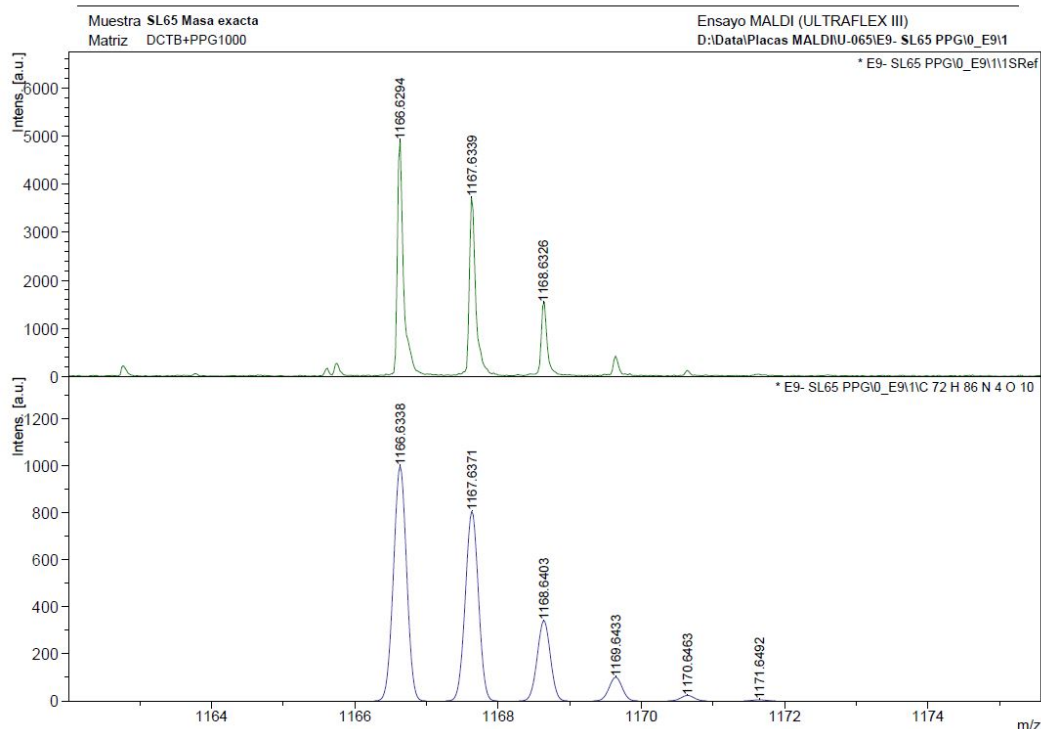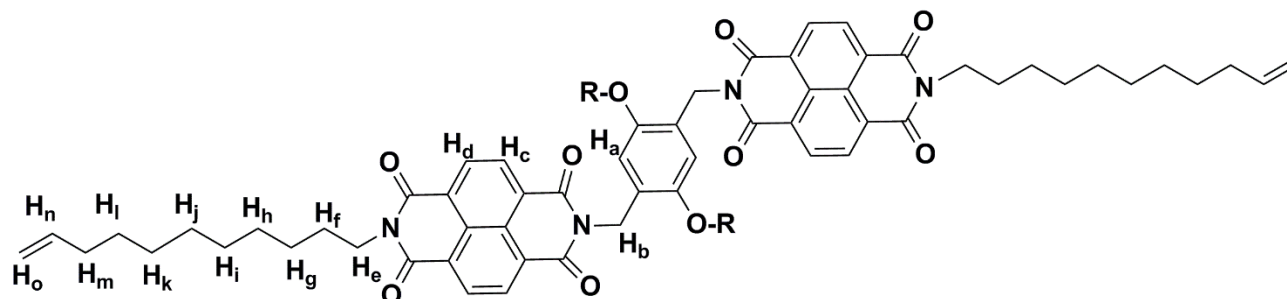

**Compound 3:**  $^1\text{H}$  NMR (300 MHz,  $\text{CDCl}_3$ )  $\delta$  8.79 (s, 8H,  $\text{H}_{c,d}$ ), 6.77 (s, 2H,  $\text{H}_a$ ), 5.83 (m, 2H,  $\text{H}_n$ ), 5.42 (s, 4H,  $\text{H}_b$ ), 4.41 (m, 4H,  $\text{H}_o$ ), 4.21(d,  $J = 5.6$  Hz, 4H,  $\text{H}_e$ ), 3.76 (m, 4H,  $\text{H}_r$ ), 2.04(m, 2H,  $\text{H}_m$ ), 1.76 (m, 2H,  $\text{H}_f$ ) 1.38 (m, 16H,  $\text{H}_r$ ), 1.17(m, 24H,  $\text{H}_{g,h,i,j,k,l}$ ) 0.81 (12H,  $\text{H}_r$ ).  $^{13}\text{C}$  NMR (75 MHz,  $\text{CDCl}_3$ )  $\delta$  162.75 (C=O), 150.75, 139.20, 130.99, 126.70, 124.47, 114.10, 112.80, 71.48, 40.99, 39.75, 39.48, 33.79, 30.39, 28.08, 27.06, 23.73, 22.97, 14.02, 11.13. HR-MS  $m/z$  calculated for  $\text{C}_{74}\text{H}_{90}\text{N}_4\text{O}_{10}$  1194.6657 found HR-MS 1194.6598.  $\epsilon$  ( $\lambda_{\text{max}}=380\text{nm}$ ) = 22355  $\text{M}^{-1}\text{cm}^{-1}$ .

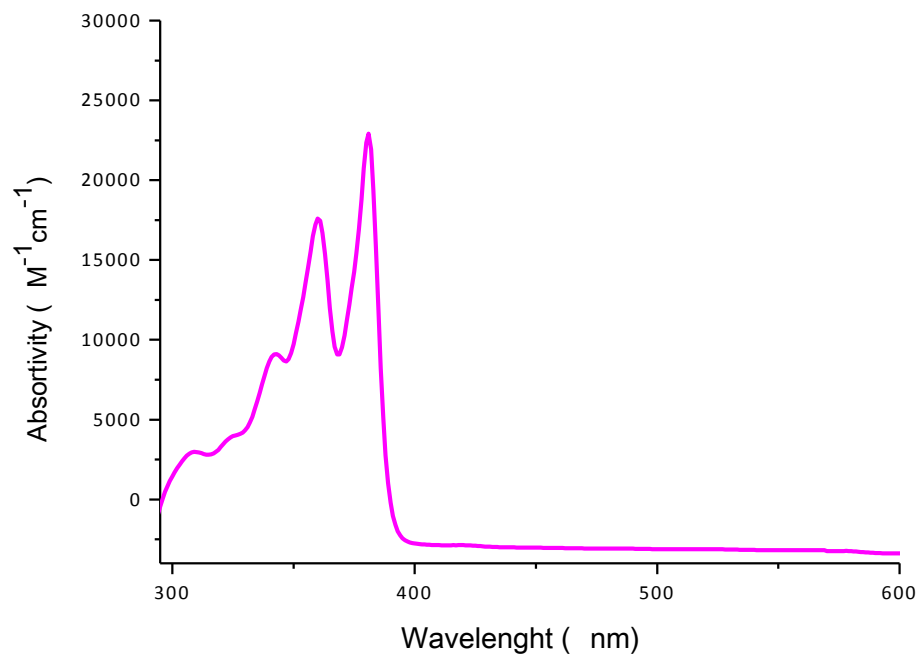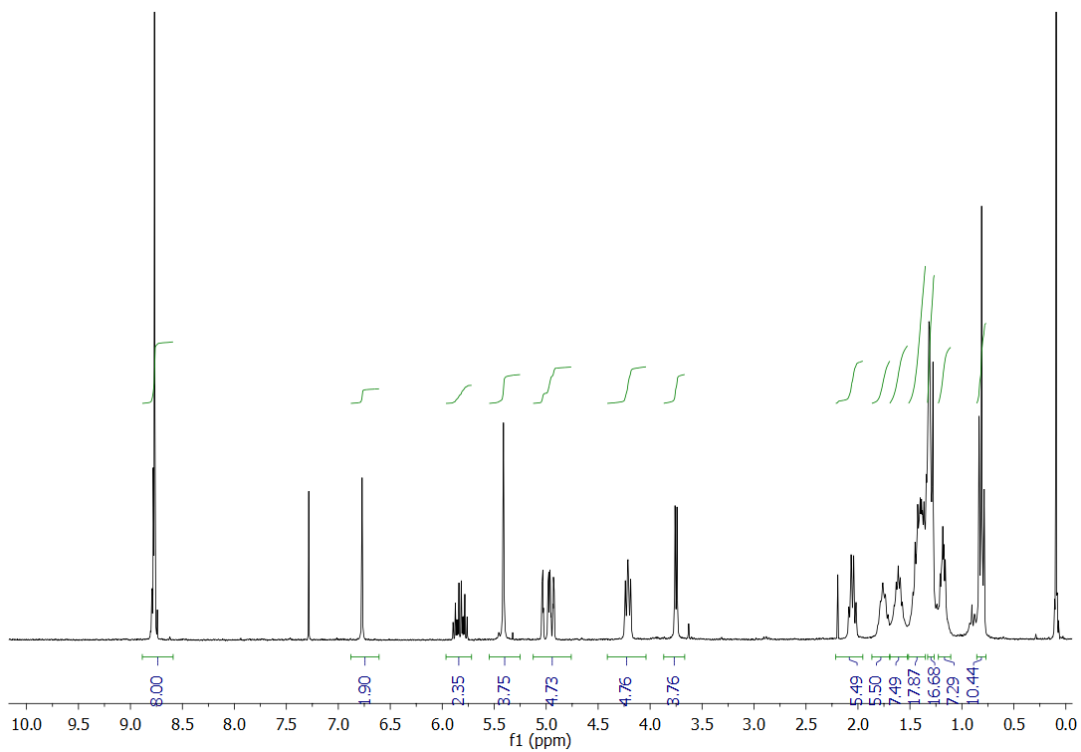

352t-s157  
SL57

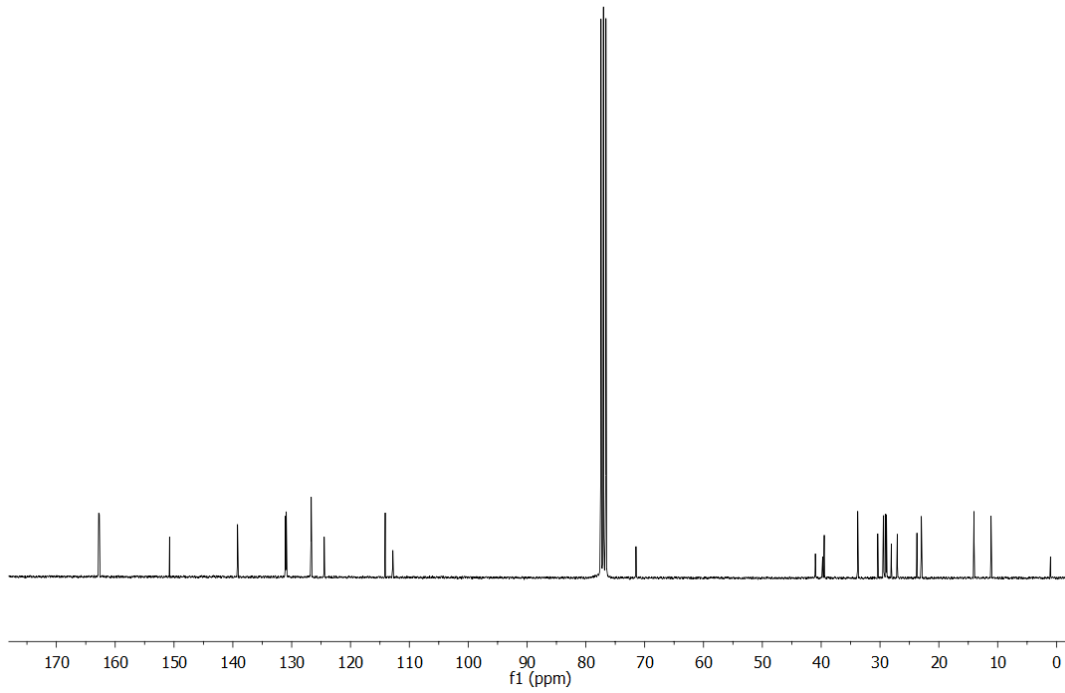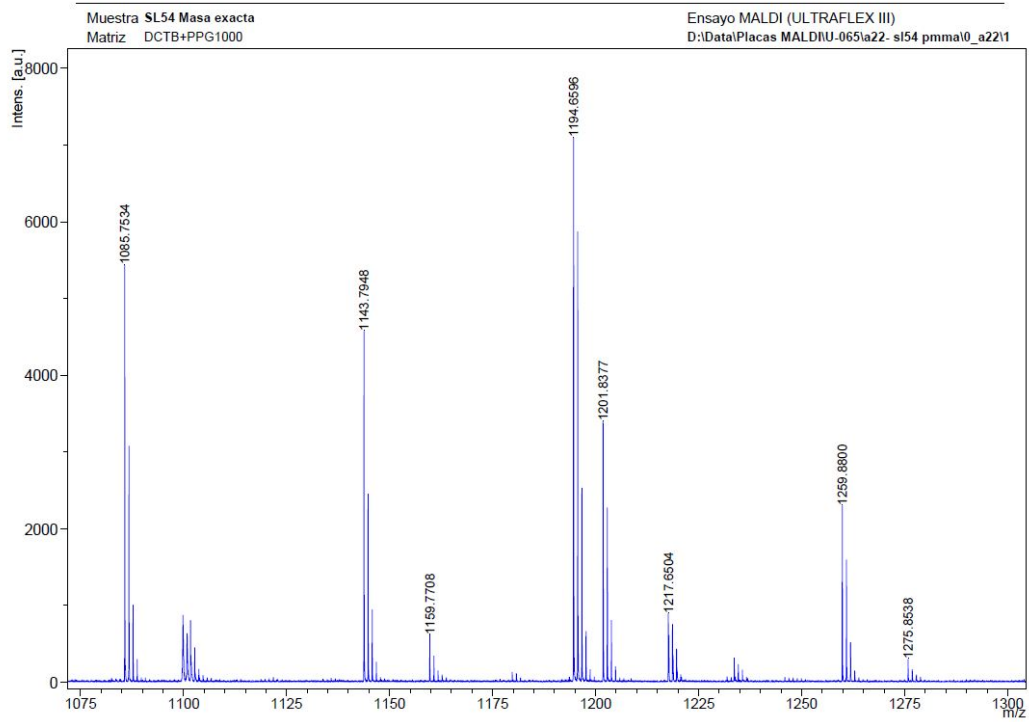

### General procedure for the metathesis reaction.

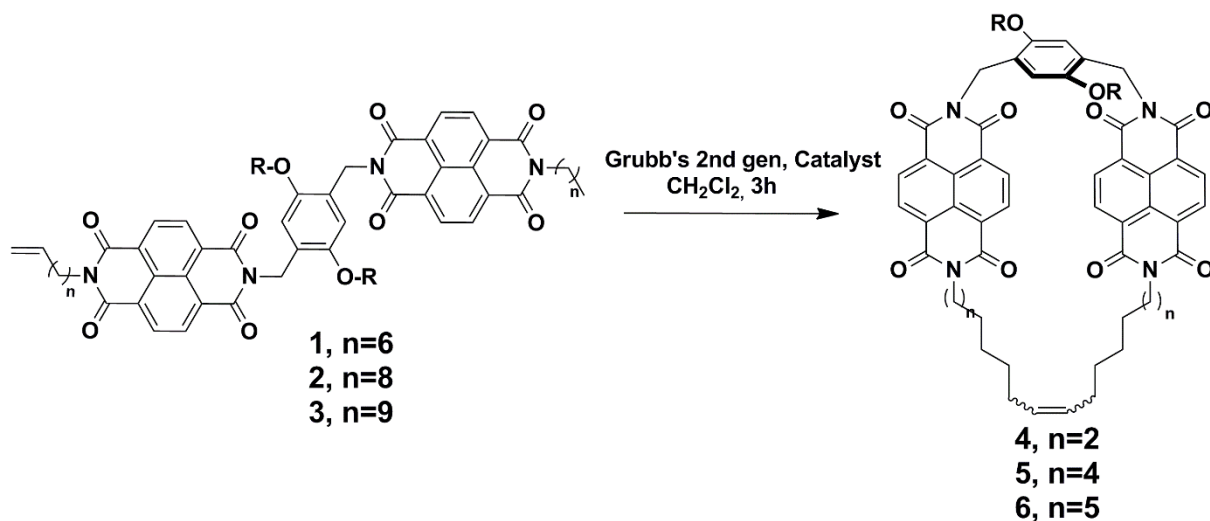

A  $10^{-4}$  M solution of linear receptor **4-6** was prepared in dichloromethane and was degassed by nitrogen bubbling during 30 minutes. Then, a catalytic amount of Grubb's 2<sup>nd</sup> generation catalyst was introduced and the mixture was stirred for three hours at room temperature. The mixture was filtered on celite and concentrated in vacuo. The desired macrocycles were finally isolated by silica gel chromatography (eluent:  $\text{CH}_2\text{Cl}_2$ ) afforded a pink solid in 82-85% yield.

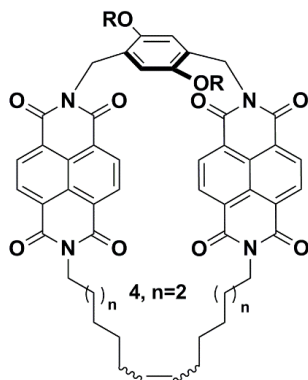

**Compound 4:**  $^1\text{H}$  NMR (300 MHz,  $\text{CDCl}_3$ )  $\delta$  8.72 (m, 8H), 6.91 (s, 2H), 5.43 (s, 4H), 5.31 (m, 2H), 4.23 (m, 4H), 3.73 (m, 4H), 1.84 (m, 4H), 1.68 (m, 2H), 1.41 (m, 38H), 1.08 (m, 12H).  $^{13}\text{C}$  NMR (75 MHz,  $\text{CDCl}_3$ )  $\delta$  162.80 (C=O), 162.41 (C=O), 150.98, 130.83, 130.79, 130.74, 129.90, 126.85, 126.58, 126.52, 126.28, 125.03, 115.20, 72.09, 53.41, 40.73, 39.45, 39.35, 32.63, 30.25, 29.48, 29.32, 28.99, 28.00, 26.71, 23.64, 23.00, 22.35, 14.09, 11.08. HR-MS  $m/z$  calculated for  $\text{C}_{66}\text{H}_{74}\text{N}_4\text{O}_{10}$  1082.5405 found HR-MS 1082.5359.  $\epsilon$  ( $\lambda_{\text{max}}=380\text{nm}$ ) =  $20210\text{ M}^{-1}\text{cm}^{-1}$ .

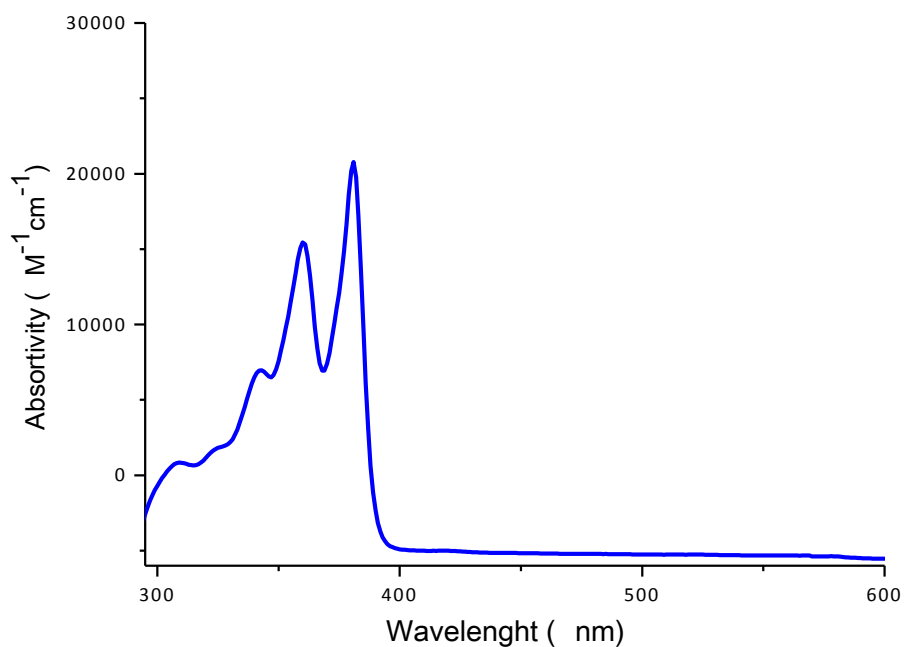

746t-s105  
SL105

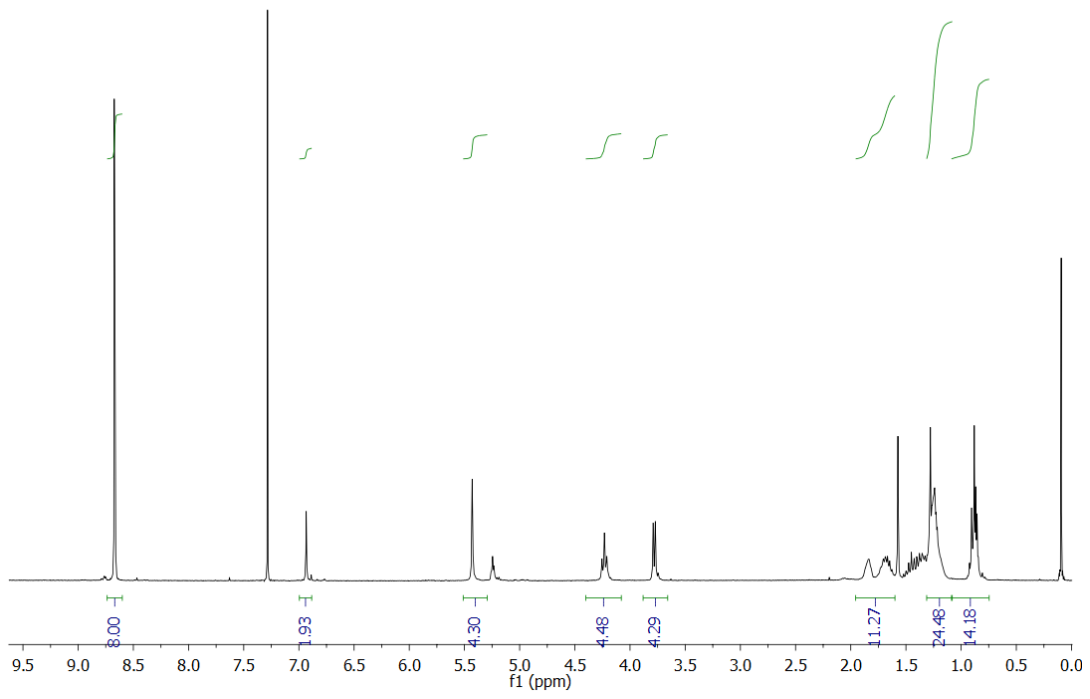

1579t-s186  
SL186

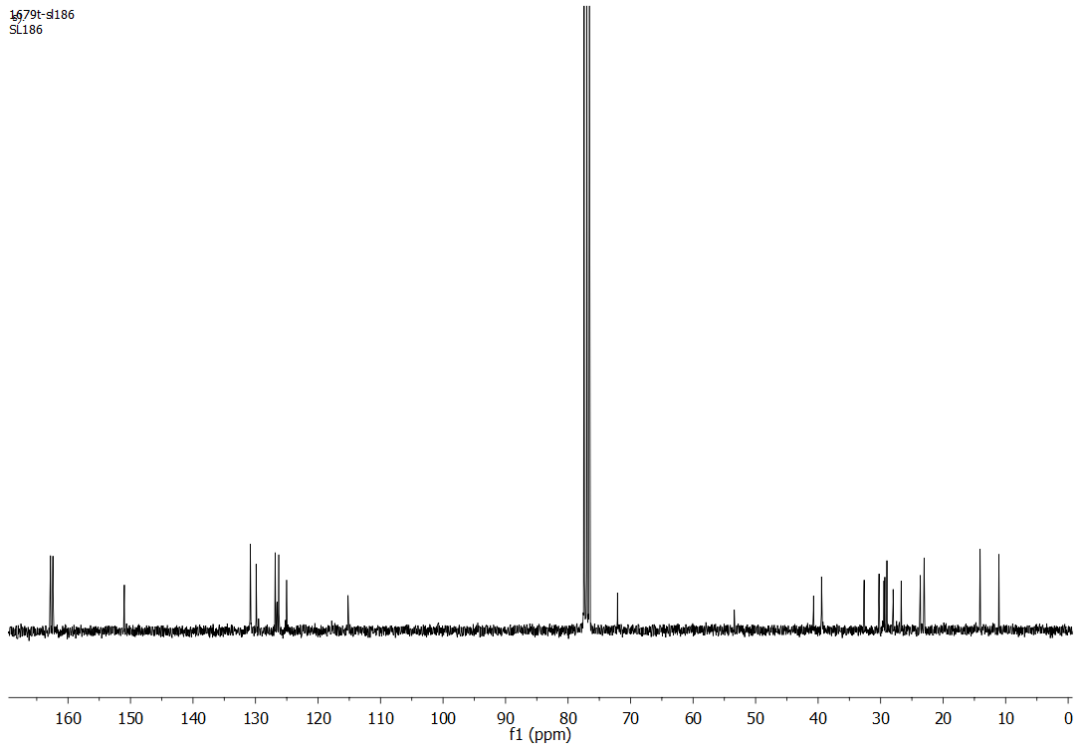

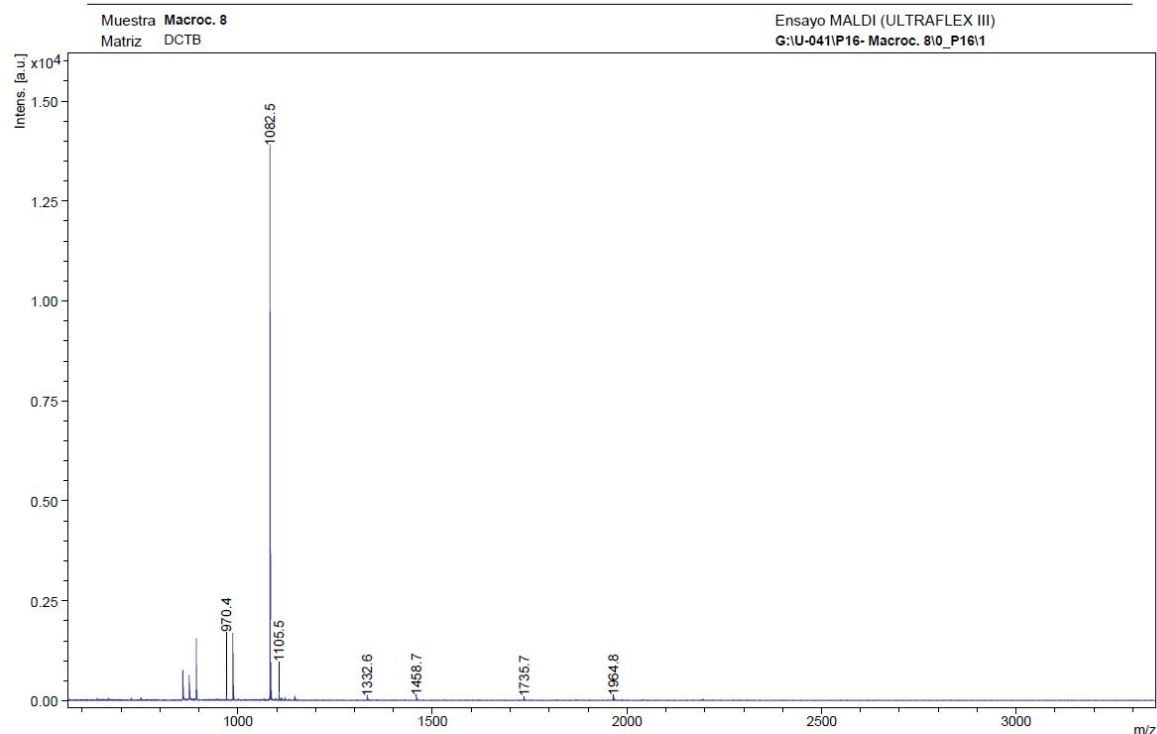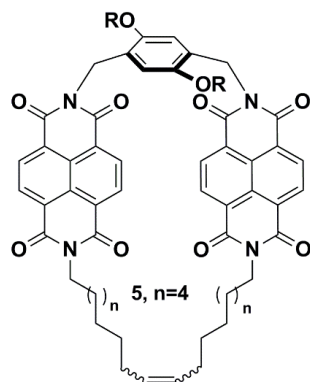

**Compound 5:**  $^1\text{H}$  NMR (300 MHz,  $\text{CDCl}_3$ )  $\delta$  8.87 (s, 8H), 6.86 (s, 2H), 5.42 (s, 4H) 5.32 (m, 2H), 4.21 (m, 4H), 3.78 (m, 4H), 1.88 (m, 4H), 1.57 (m, 2H), 1.55 (m, 44H), 1.00 (m, 12H),  $^{13}\text{C}$  NMR (75 MHz,  $\text{CDCl}_3$ )  $\delta$  162.79 (C=O), 162.48 (C=O), 150.88, 130.85, 130.08, 126.79, 126.4, 124.61, 71.77, 40.83, 39.86, 39.43, 32.50, 30.91, 30.27, 29.64, 29.40, 29.30, 29.11, 28.96, 28.02, 26.88,

23.63, 22.99, 14.05, 11.08. MS m/z calculated for  $C_{70}H_{82}N_4O_{10}$  1138.6031 found HR-MS

1138.5971.  $\epsilon$  ( $\lambda_{\max}=380\text{nm}$ ) =  $19955\text{ M}^{-1}\text{cm}^{-1}$ .

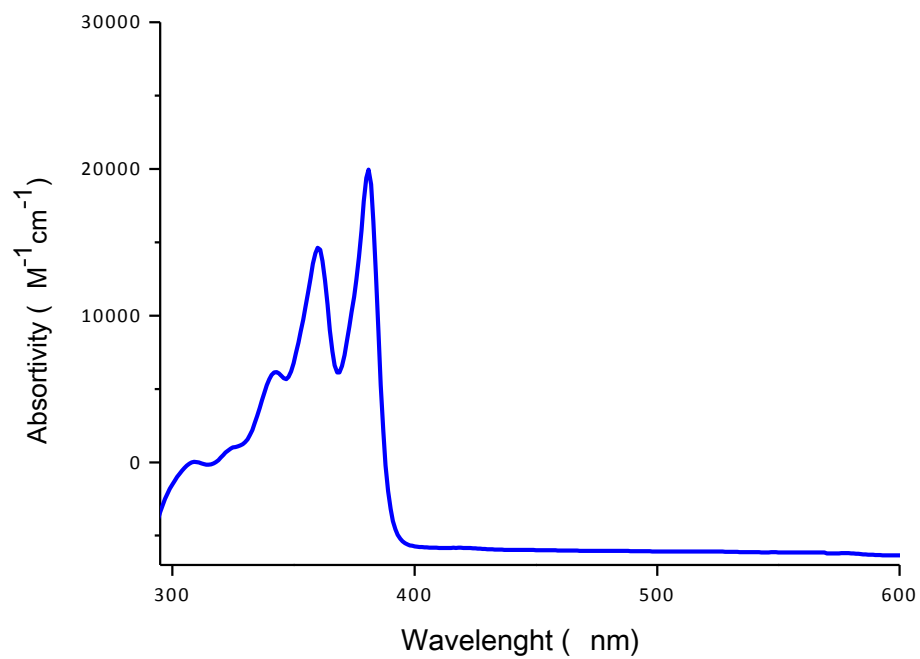



385t-s177  
SL77

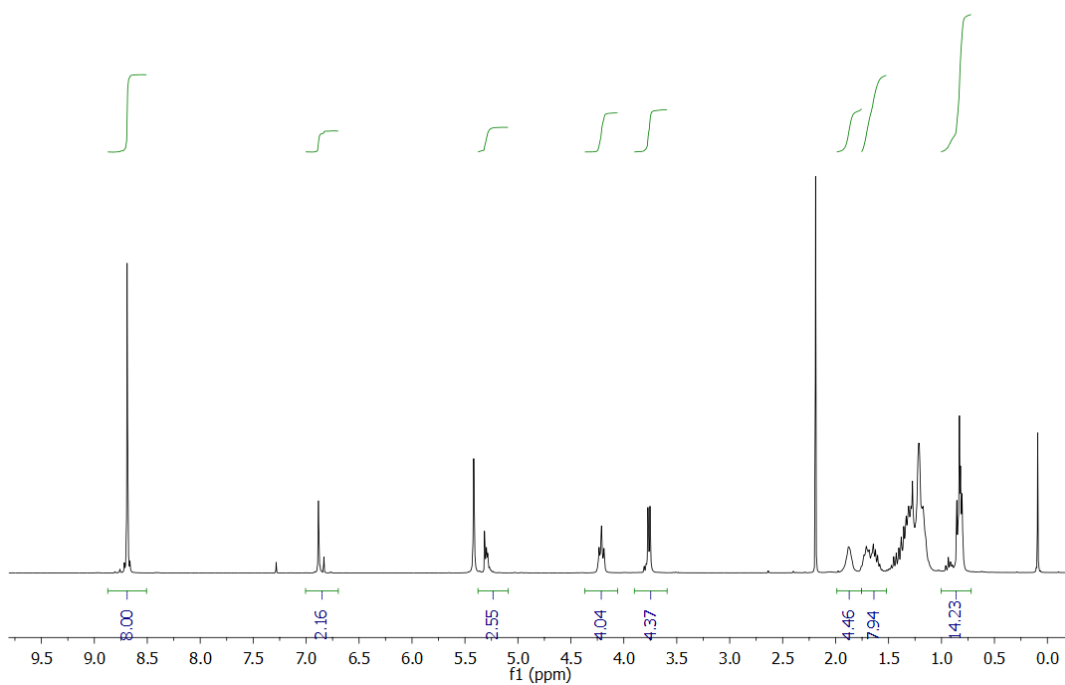

401t-s177  
SL77

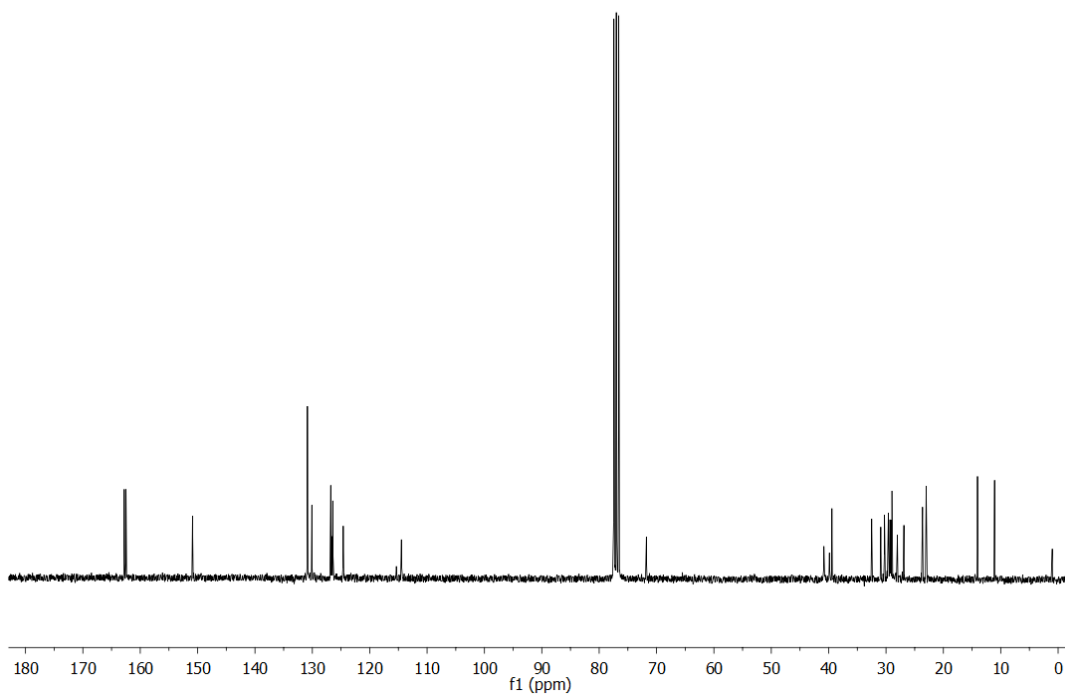

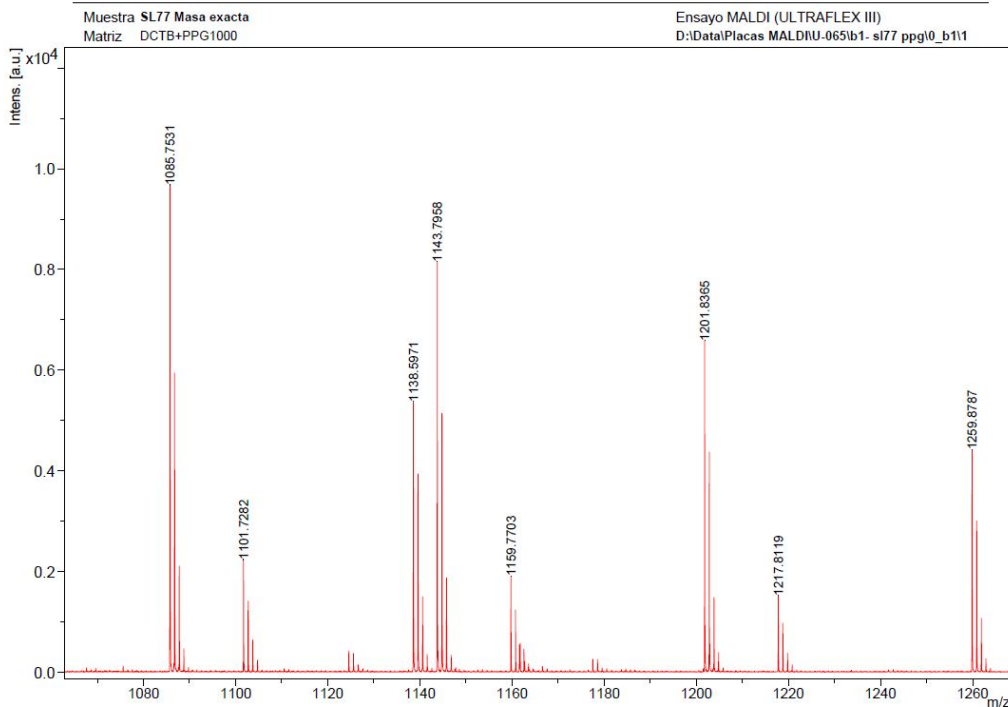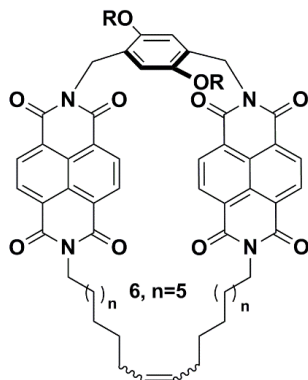

**Compound 6:**  $^1\text{H}$  NMR (300 MHz,  $\text{CDCl}_3$ )  $\delta$  8.78 (m, 8H), 6.90 (s, 2H), 5.46 (s, 4H), 5.36 (m, 2H), 4.24 (m, 4H), 3.78 (m, 4H), 1.90 (m, 4H), 1.77 (m, 2H), 1.53 (m, 48H), 1.04 (m, 12H).  $^{13}\text{C}$  NMR (75 MHz,  $\text{CDCl}_3$ )  $\delta$  162.84 (C=O), 162.55 (C=O), 130.89, 130.27, 126.79, 126.51, 77.32, 77.21, 77.00, 76.69, 39.43, 32.55, 30.28, 29.43, 29.29, 29.14, 28.96, 28.90, 26.82, 23.63, 22.98, 14.04, 11.08. MS  $m/z$  calculated for  $\text{C}_{72}\text{H}_{86}\text{N}_4\text{O}_{10}$  1166.6344 found HR-MS 1166.6295.

$\epsilon$  ( $\lambda_{\text{max}}=380\text{nm}$ )=  $19066 \text{ M}^{-1}\text{cm}^{-1}$ .

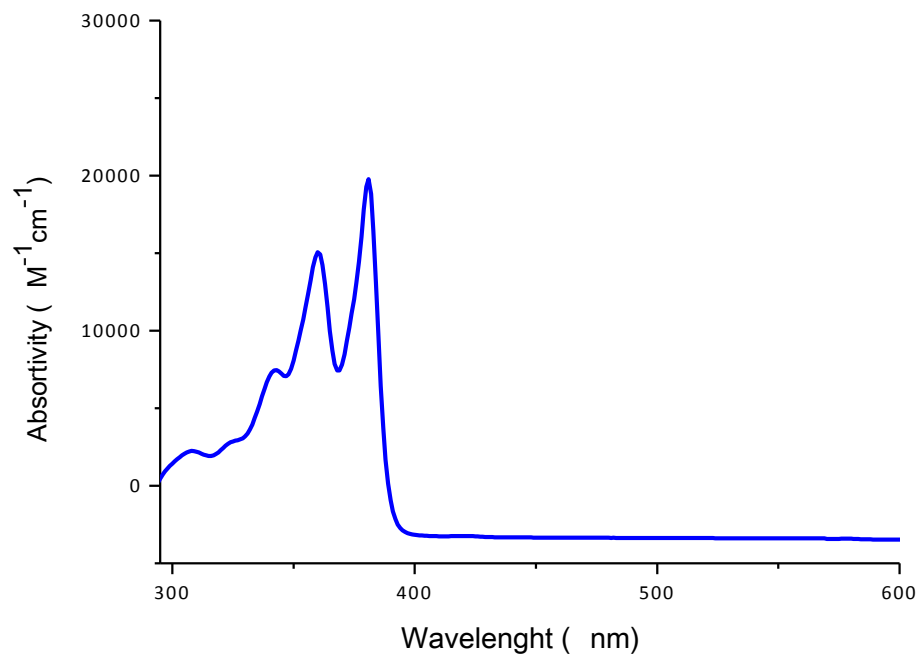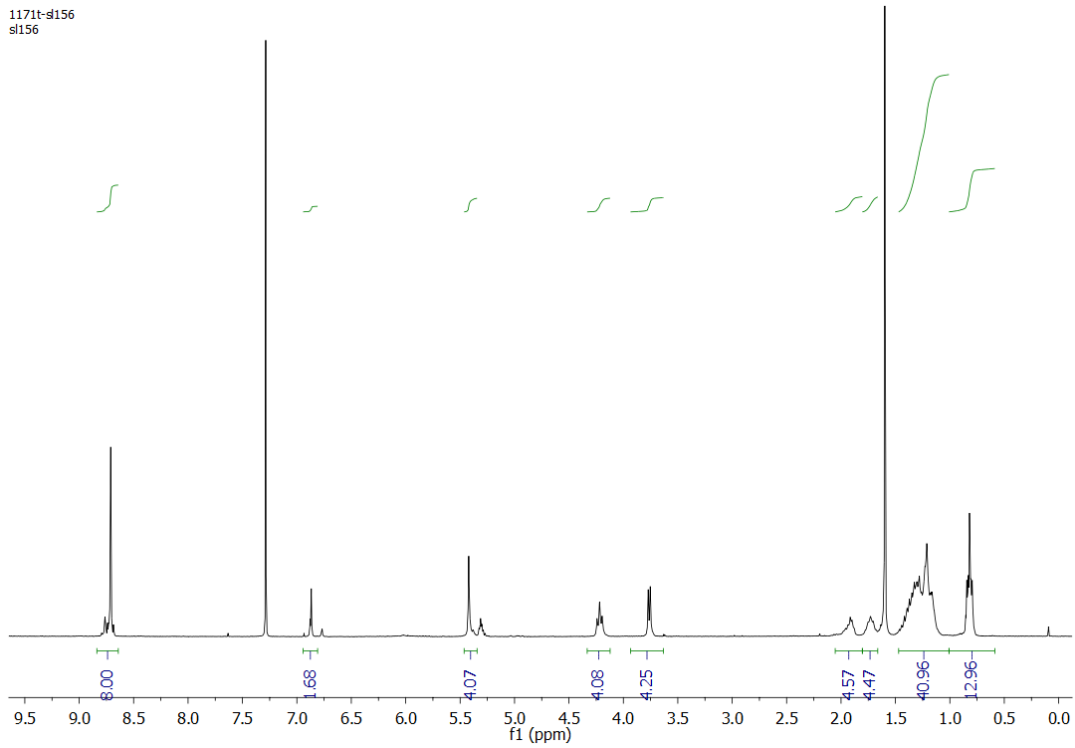

SLMC11

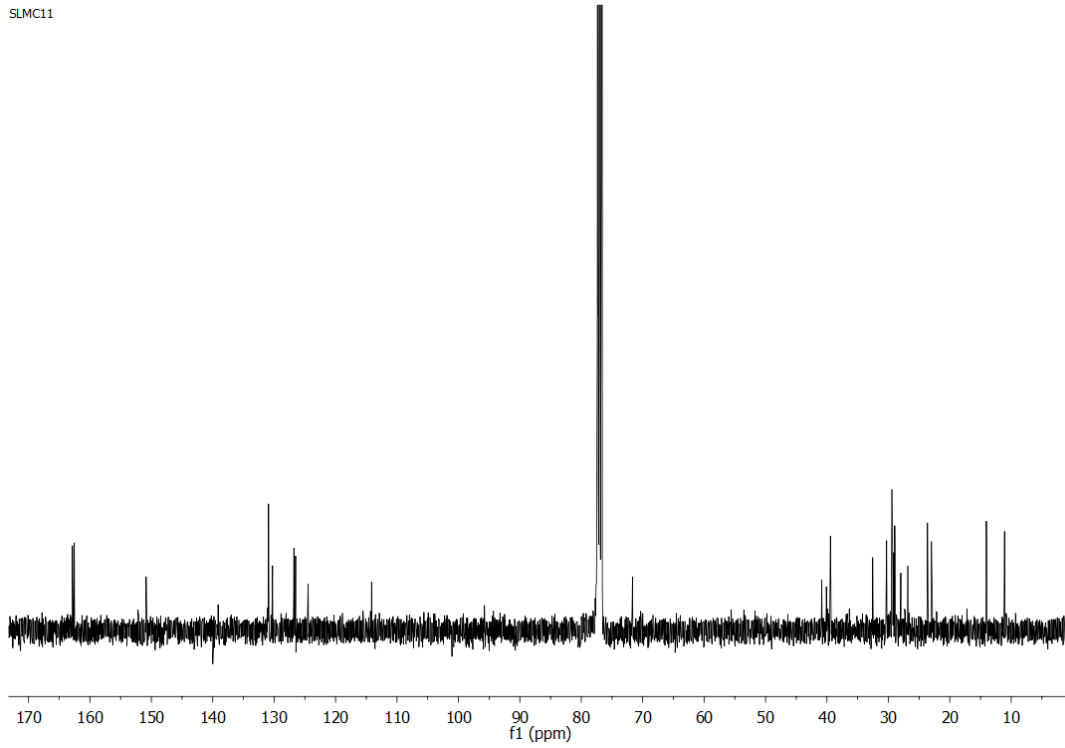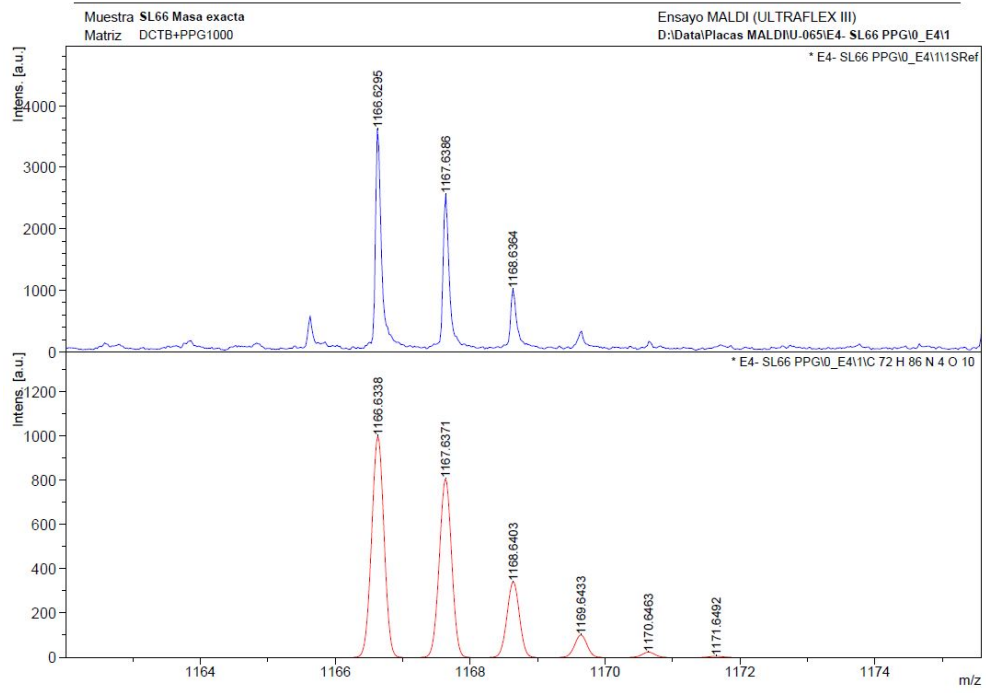

### **General procedure for SWNTs functionalization.**

The nanotubes (5mg) were suspended in 5 ml of either tetrachloroethane (TCE) or N, N-dimethylformamide (DMF) through sonication during 10 min. After sonication the linear precursor **4-6** was added and the mixture was degasified during 20 min, the Grubb's 2<sup>nd</sup> generation catalyst was added and the mixture was stirred at room temperature for 72 h. The suspension was filtered through a PTFE membrane of 0.2 µm pore size and the solid washed with dichloromethane (DMC). The solid was re-suspended in 20 ml of DMC through sonication during 10 min and filtered through PTFE membrane again. This washing was repeated three times.

### **General Procedure for SWNTs Functionalization varying the relative c concentration of 5 with respect to SWNTs.**

The nanotube (1mg /1ml) were suspended in TCE and DMF through sonication (10 min) and mixed with the linear precursor 5 (0.044 mM, 2.3 mM, 4.5 mM) and Grubb's 2<sup>nd</sup> generation catalyst at room temperature for 72h. The suspension was filtered and washed using the same procedure described above.

### **General Procedure for SWNTs Functionalization (control experiment).**

The nanotubes (5mg) were suspended in 5 ml of tetrachloroethane (TCE) and N, N-dimethylformamide (DMF) through sonication during 10 min. After sonication the solvent was the linear precursor **1-3** or macrocycle **4-6** was added and the mixture was degasified during 20 min, the Grubb's 2<sup>nd</sup> generation catalyst was added and the mixture was stirred at

room temperature for 72 h. The suspension as filtered through a PTFE membrane of 0.2  $\mu\text{m}$  pore size and the solid washed with dichloromethane (DMC). The solid was re-suspended in 20 ml of DMC through sonication during 10 min and filtered through PTFE membrane again. This washing was repeated three times.

### General Procedure for de-threading Functionalized SWNTs.

The functionalized nanotubes (2mg) were suspended in 5 ml of TCE by sonication for 5 min and then heated to reflux (bp = 146<sup>o</sup>C) for 30 min. The suspension was filtered through a PTFE of 0.2  $\mu\text{m}$  pore size and the solid washed profusely with DCM. De-threading was observed by TGA.

| Chirality | Diameter   | CNT (kJ/mol) | SYS (kJ/mol) | CMB (kJ/mol) | Eb (kJ/mol) | Eb (kcal/mol) | atoms |
|-----------|------------|--------------|--------------|--------------|-------------|---------------|-------|
| (6,5)     | 7.4700E-01 | 2.2188E+04   | 6.8350E+02   | 2.2870E+04   | -8.9600E-01 | -2.1410E-01   | 476   |
| (7,5)     | 8.1800E-01 | 2.5372E+04   | 1.1134E+03   | 2.6601E+04   | 1.1613E+02  | 2.7749E+01    | 548   |
| (7,6)     | 8.8200E-01 | 2.8622E+04   | 1.4844E+03   | 3.0707E+04   | 6.0060E+02  | 1.4351E+02    | 620   |
| (8,3)     | 7.7100E-01 | 2.3386E+04   | 8.1166E+02   | 2.4234E+04   | 3.6141E+01  | 8.6358E+00    | 500   |
| (8,4)     | 8.2900E-01 | 2.5733E+04   | 1.1975E+03   | 2.7066E+04   | 1.3618E+02  | 3.2540E+01    | 560   |
| (9,5)     | 9.6220E-01 | 3.2656E+04   | 2.3079E+03   | 3.5807E+04   | 8.4292E+02  | 2.0141E+02    | 716   |
| (8,6)     | 9.5300E-01 | 3.2153E+04   | 2.2418E+03   | 3.5205E+04   | 8.0949E+02  | 1.9343E+02    | 704   |
| (9,3)     | 8.4700E-01 | 2.6900E+04   | 1.3427E+03   | 2.8410E+04   | 1.6697E+02  | 3.9897E+01    | 580   |
| (11,0)    | 8.6100E-01 | 1.6413E+04   | 1.4627E+03   | 1.8065E+04   | 1.8949E+02  | 4.5278E+01    | 420   |
| (10,2)    | 8.7200E-01 | 2.8180E+04   | 1.5678E+03   | 2.9959E+04   | 2.1138E+02  | 5.0509E+01    | 608   |

Figure S1: Dataset interaction energies of a series of SWNTs with macrocycle 6.

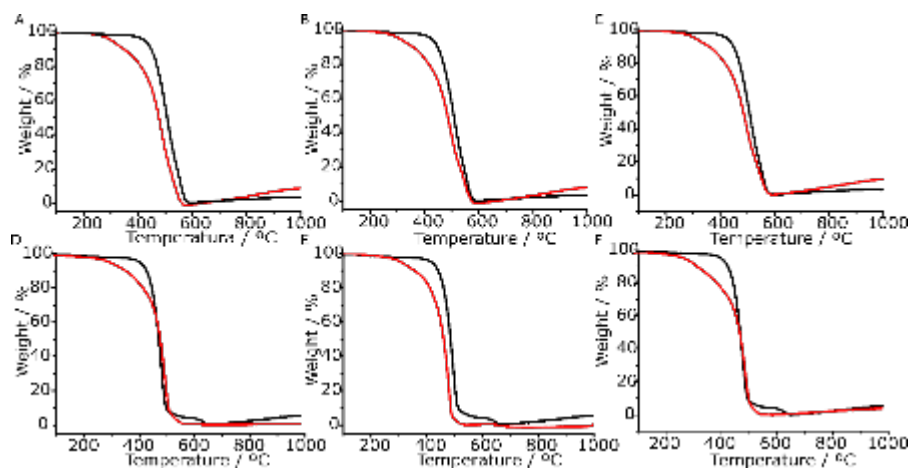

**Figure S2:**A-F: TGA (air,  $10 \text{ min}^{-1}$ ) of: a) (6,5) SWNTs (Black line), 1-(6,5)-TCE (red line), b) (6,5) SWNTs (Black line), 2-(6,5)-TCE (red line), c) (6,5) SWNTs (Black line), 3-(6,5)-TCE (red line), d) (7,6) SWNTs (Black line), 1-(7,6)-TCE (red line), e) (7,6) SWNTs (Black line), 2-(7,6)-TCE (red line), f) (7,6) SWNTs (Black line), 3-(7,6)-TCE (red line).

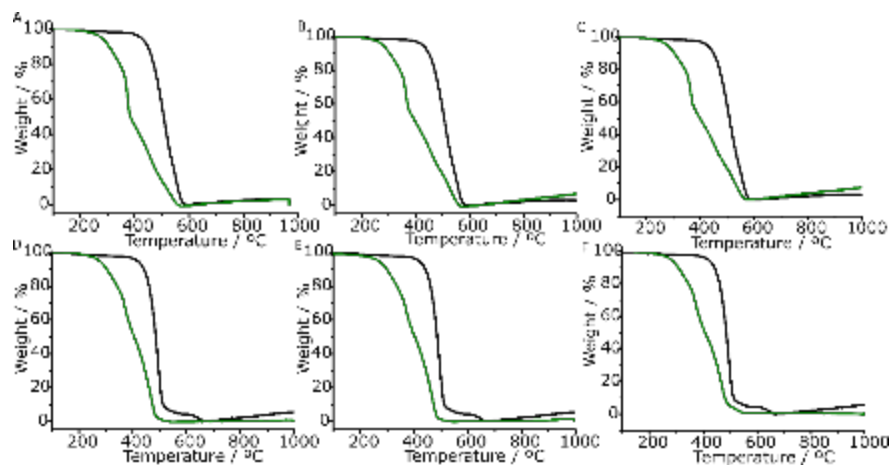

**Figure S3:** A-F: TGA (air,  $10 \text{ min}^{-1}$ ) of: a) (6,5) SWNTs (Black line), 1-(6,5)-DMF (green line), b) (6,5) SWNTs (Black line), 2-(6,5)-DMF (green line), c) (6,5) SWNTs (Black line), 3-(6,5)-DMF (green line), d) (7,6) SWNTs (Black line), 1-(7,6)-DMF (green line), e) (7,6) SWNTs (Black line), 2-(7,6)-DMF (green line), f) (7,6) SWNTs (Black line), 3-(7,6)-DMF (green line).

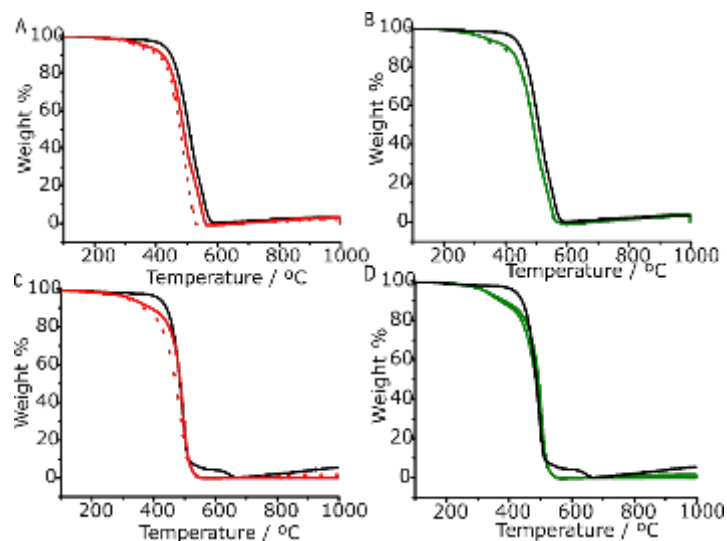

**Figure S4:** A-D: TGA (air, 10 min<sup>-1</sup>) of: a) **2**-(6,5)-TCE reaction with catalyst (Black line), **2**-(6,5)-TCE without catalyst (solid red line), **2**-(6,5)-TCE (dashed red line) b) **2**-(6,5)-DMF reaction with catalyst (Black line), **2**-(6,5)-DMF without catalyst (solid green line), **2**-(6,5)-DMF (dashed green line), c) **3**-(7,6)-TCE reaction with catalyst (Black line), **3**-(7,6)-TCE without catalyst (solid red line), **3**-(7,6)-TCE (dashed red line), d) **3**-(7,6)-DMF reaction with catalyst (Black line), **3**-(7,6)-DMF without catalyst (solid green line), **3**-(7,6)-DMF (dashed green line).

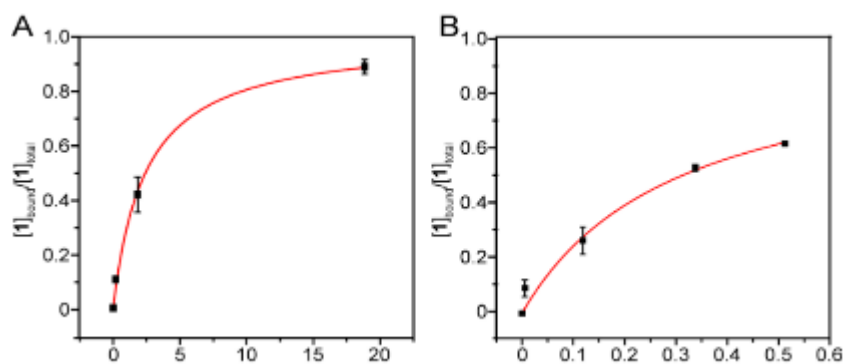

**Figure S5:** Titration of **3** vs (6,5)-SWNTs in a) TCE ( $K_a = 2.6 \pm 0.1 \text{ M}^{-1}$ ,  $r^2 = 0.9967$ ) and b) DMF ( $K_a = 3.5 \pm 0.2 \text{ M}^{-1}$ ,  $r^2 = 0.8713$ ).



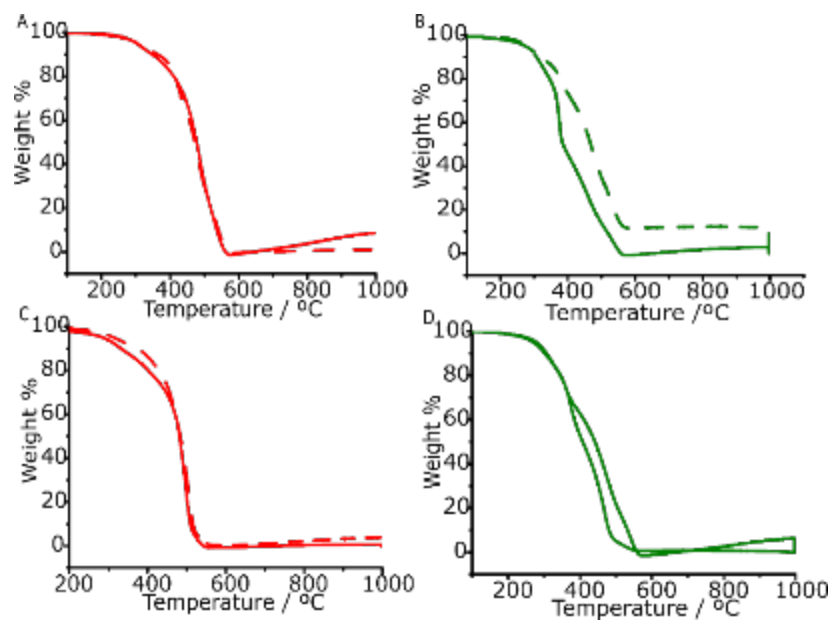

**Figure S6: A-D:** TGA (air,  $10 \text{ min}^{-1}$ ) of: a) 1-(6,5)-TCE (solid red line), 1-(6,5)-TCE after heating at reflux in TCE for 30 min (dashed red line), b) 1-(6,5)-DMF (solid green line), 1-(6,5)-DMF after heating at reflux in TCE for 30 min (dashed green line), c) 3-(7,6)-TCE (solid red line), 3-(7,6)-TCE after heating at reflux in TCE for 30 min (dashed red line), d) 3-(7,6)-DMF (solid green line), 3-(7,6)-DMF after heating at reflux in TCE for 30 min (dashed green line).

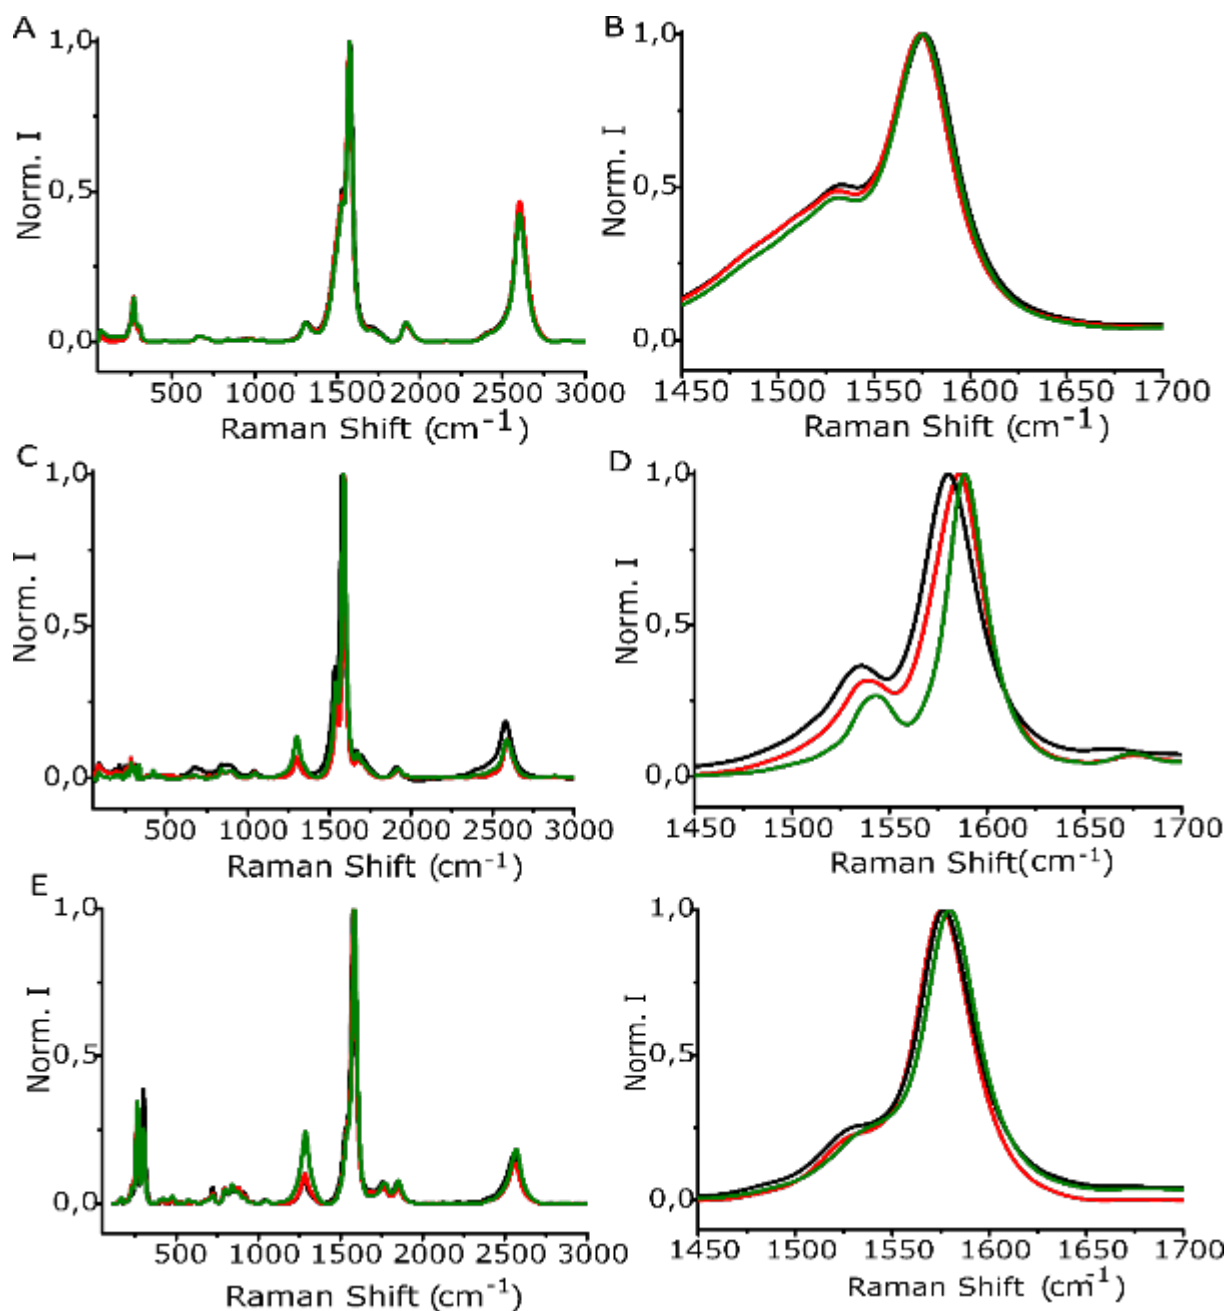

**Figure S7 A-F:** Raman spectra ( $\lambda_{\text{exc}} = 532 \text{ nm}$ ) of a) (6,5) SWNTs (black line), 1-(6,5)-TCE (red line) and 1-(6,5)-DMF (green line), b) Zoom in of the G band of the spectra, Raman spectra ( $\lambda_{\text{exc}} = 633 \text{ nm}$ ) of c) (6,5) SWNTs (black line), 1-(6,5)-TCE (solid red line) and 1-(6,5)-DMF (green line), d) Zoom in of the G band of the spectra, Raman spectra ( $\lambda_{\text{exc}} = 785 \text{ nm}$ ) of e) (6,5) SWNTs (black line), 1-(6,5)-TCE (solid red line) and 1-(6,5)-DMF (green line), f) Zoom in of the G band of the spectra.

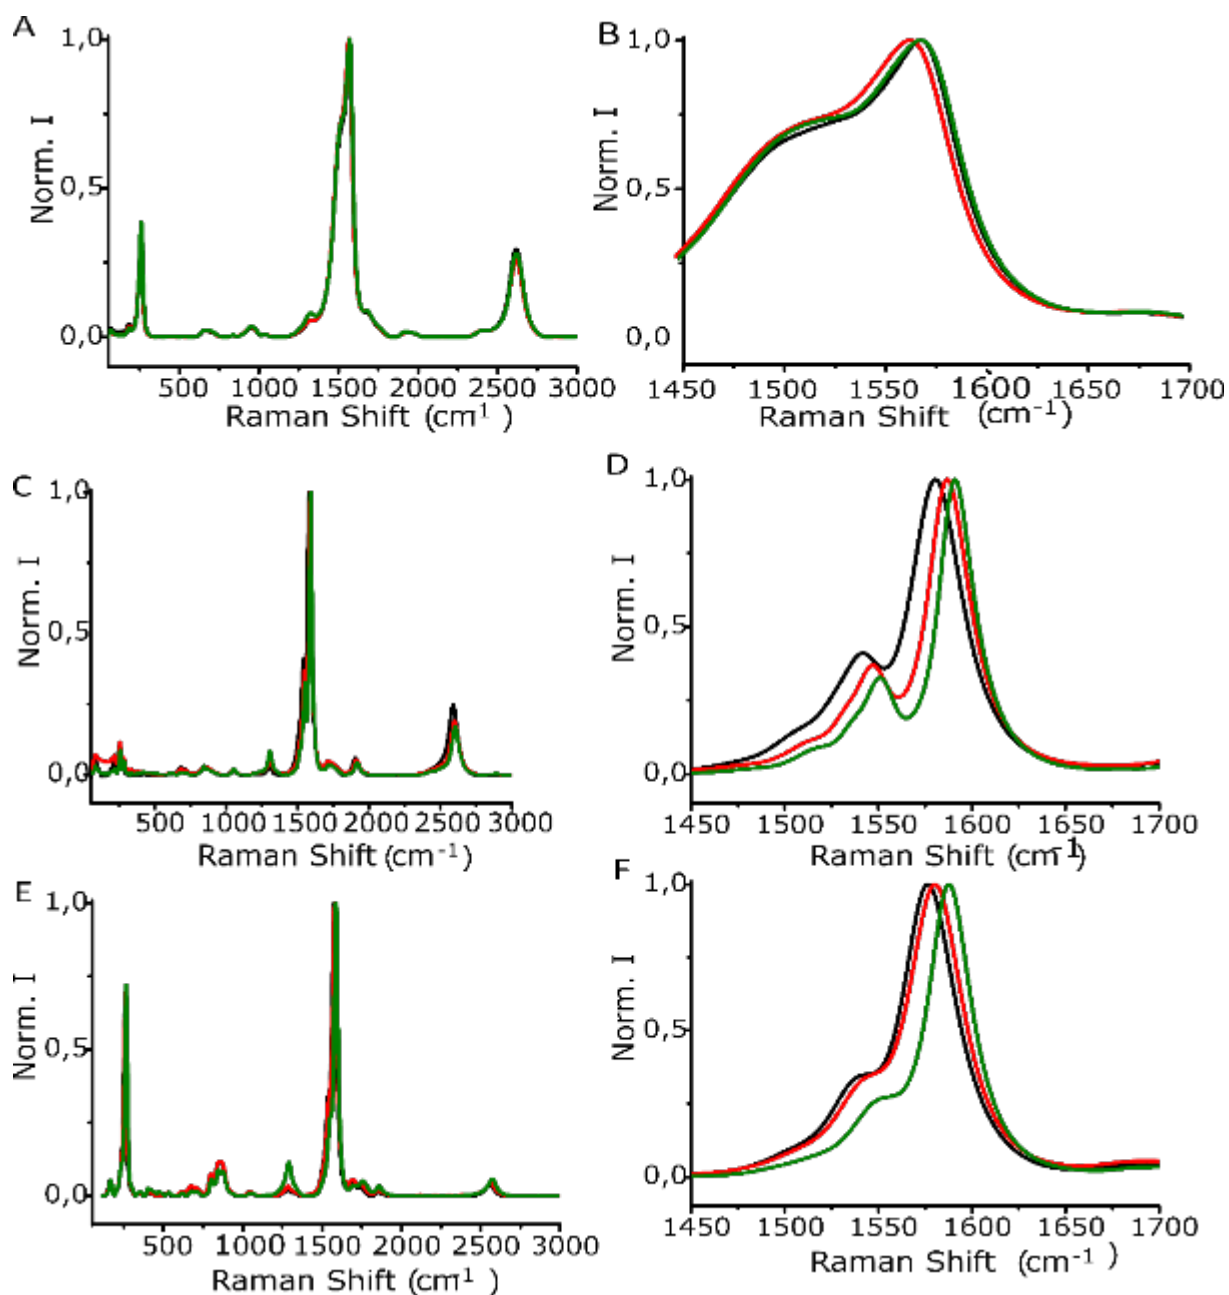

**Figure S8 A-F:** Raman spectra ( $\lambda_{\text{exc}} = 532$  nm) of a) (7,6) SWNTs (black line), 1-(7,6)-TCE (red line) and 1-(7,6)-DMF (green line), b) Zoom in of the G band of the spectra, Raman spectra ( $\lambda_{\text{exc}} = 633$  nm) of c) (7,6) SWNTs (black line) and 1-(7,6)-TCE (solid red line), 1-(7,6)-DMF (green line), d) Zoom in of the G band of the spectra, Raman spectra ( $\lambda_{\text{exc}} = 785$  nm) of e) (7,6) SWNTs (black line), 1-(7,6)-TCE (solid red line) and 1-(7,6)-DMF (green line), f) Zoom in of the G band of the spectra.

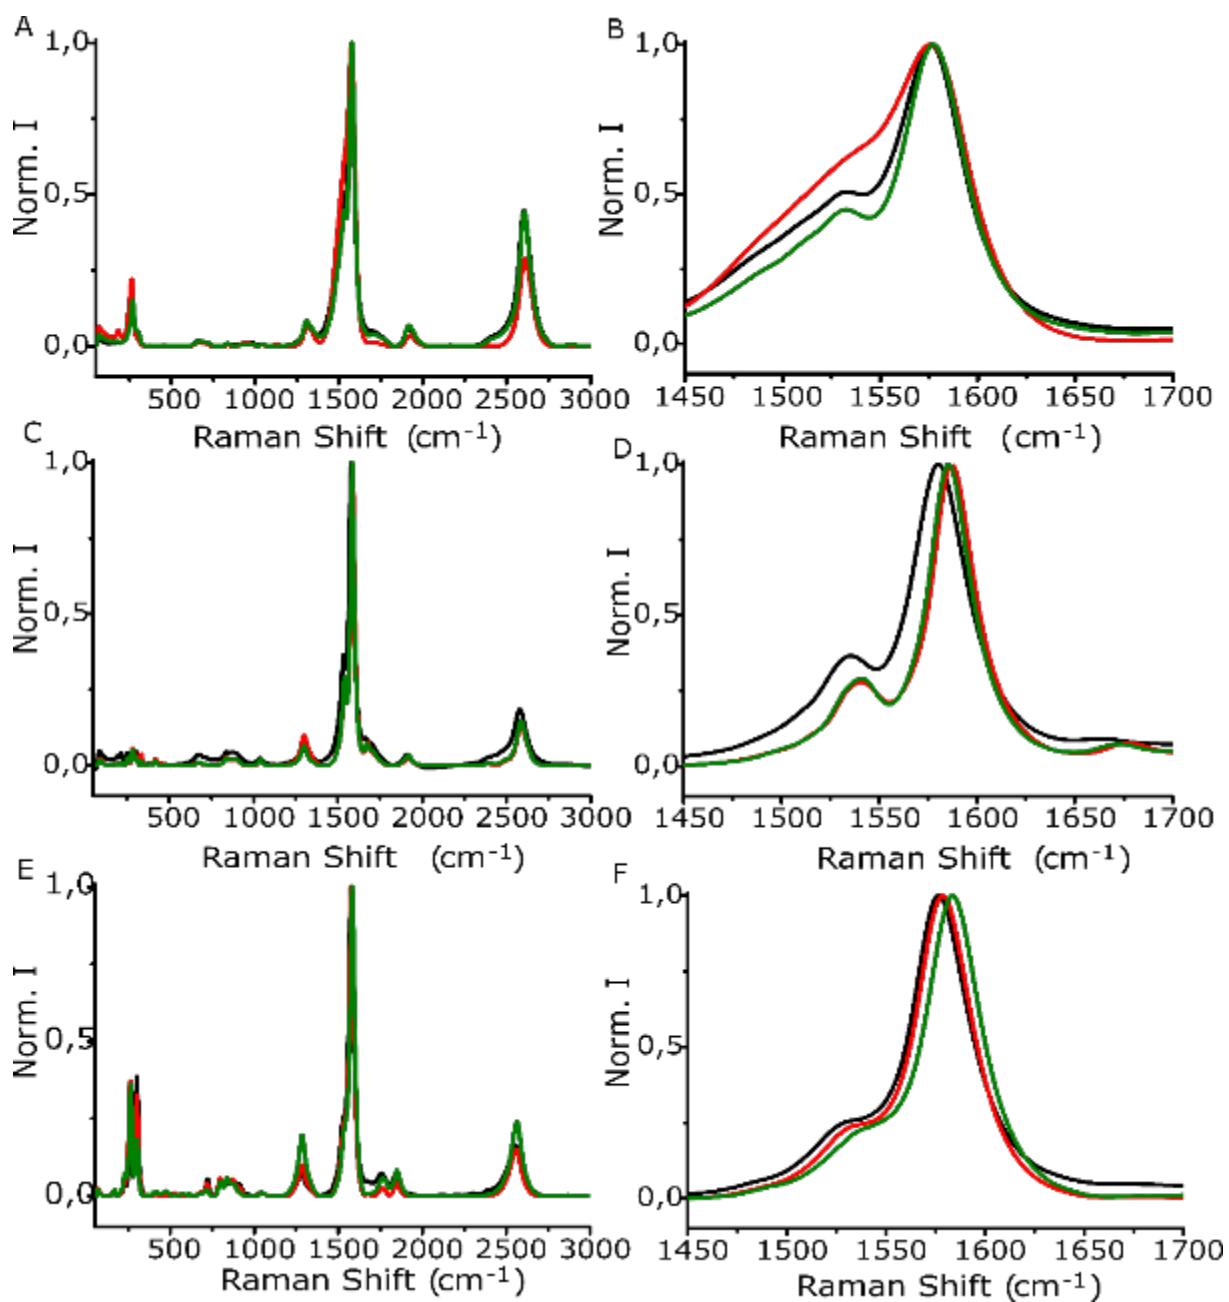

**Figure S9 A-F:** Raman spectra ( $\lambda_{\text{exc}} = 532$  nm) of a) (6,5) SWNTs (black line), 2-(6,5)-TCE (red line) and 2-(6,5)-DMF (green line), b) Zoom in of the G band of the spectra, Raman spectra ( $\lambda_{\text{exc}} = 633$  nm) of c) (6,5) SWNTs (black line), 2-(6,5)-TCE (solid red line) and 2-(6,5)-DMF (green line), d) Zoom in of the G band of the spectra, Raman spectra ( $\lambda_{\text{exc}} = 785$  nm) of e) (6,5) SWNTs (black line), 2-(6,5)-TCE (solid red line) and 2-(6,5)-DMF (green line), f) Zoom in of the G band of the spectra.

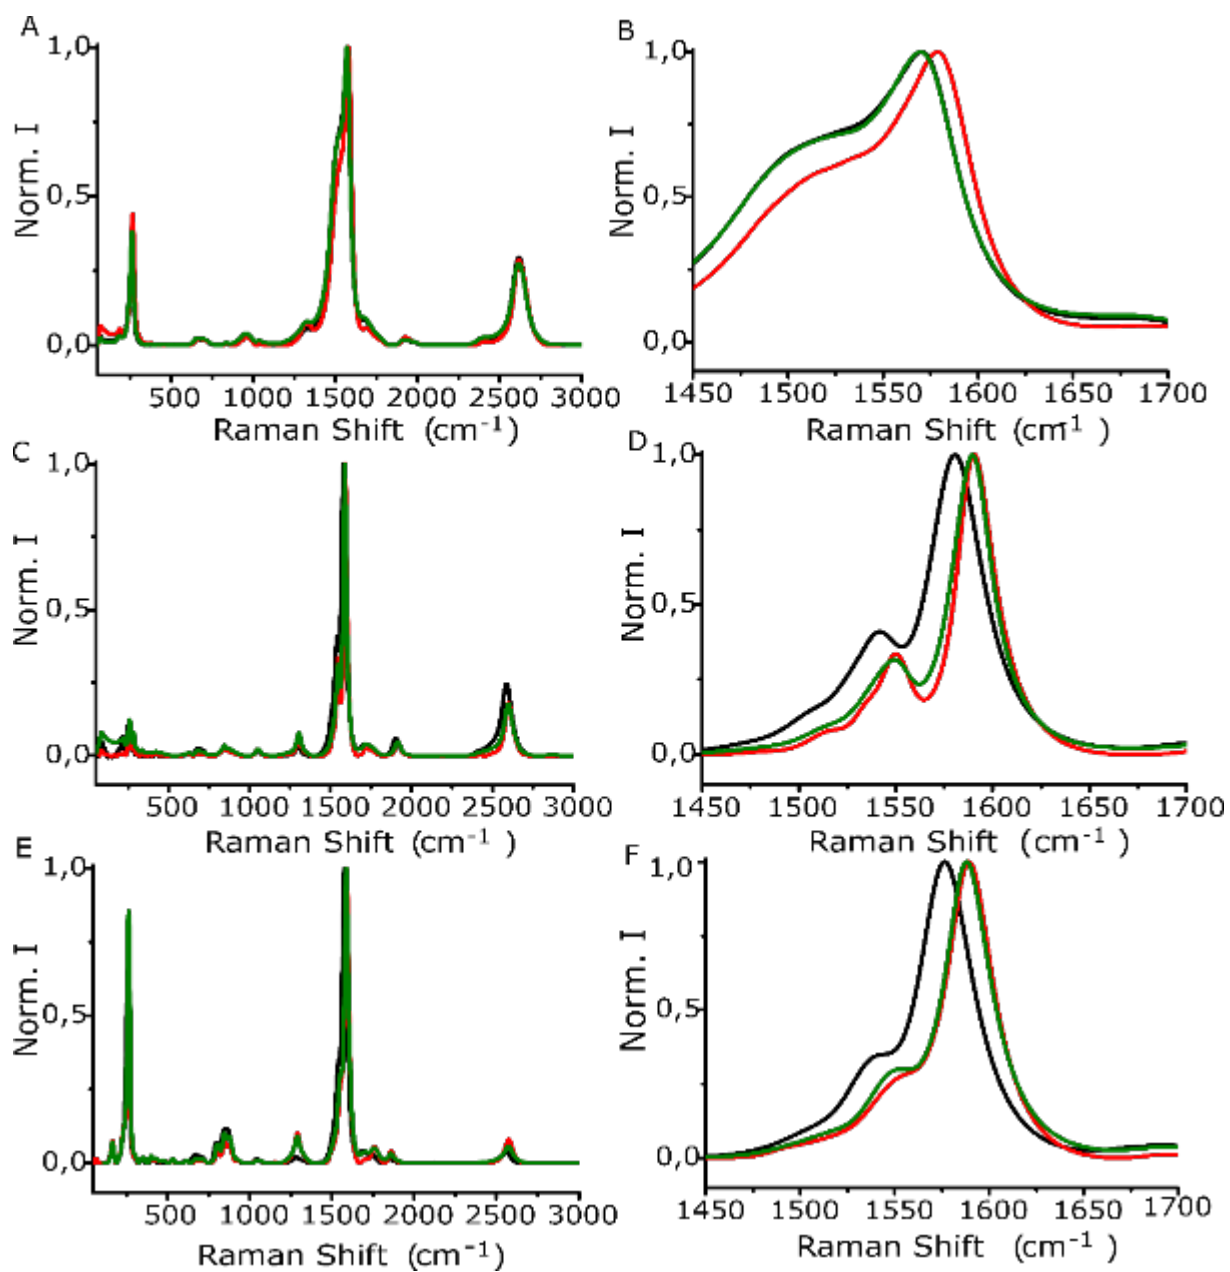

**Figure S10 A-F:** Raman spectra ( $\lambda_{\text{exc}} = 532$  nm) of a) (7,6) SWNTs (black line), 2-(7,6)-TCE (red line) and 2-(7,6)-DMF (green line), b) Zoom in of the G band of the spectra, Raman spectra ( $\lambda_{\text{exc}} = 633$  nm) of c) (7,6) SWNTs (black line), 2-(7,6)-TCE (solid red line) and 2-(7,6)-DMF (green line). d) Zoom in of the G band of the spectra, Raman spectra ( $\lambda_{\text{exc}} = 785$  nm) of e) (7,6) SWNTs (black line), 2-(7,6)-TCE (solid red line) and 2-(7,6)-DMF (green line), f) Zoom in of the G band of the spectra.

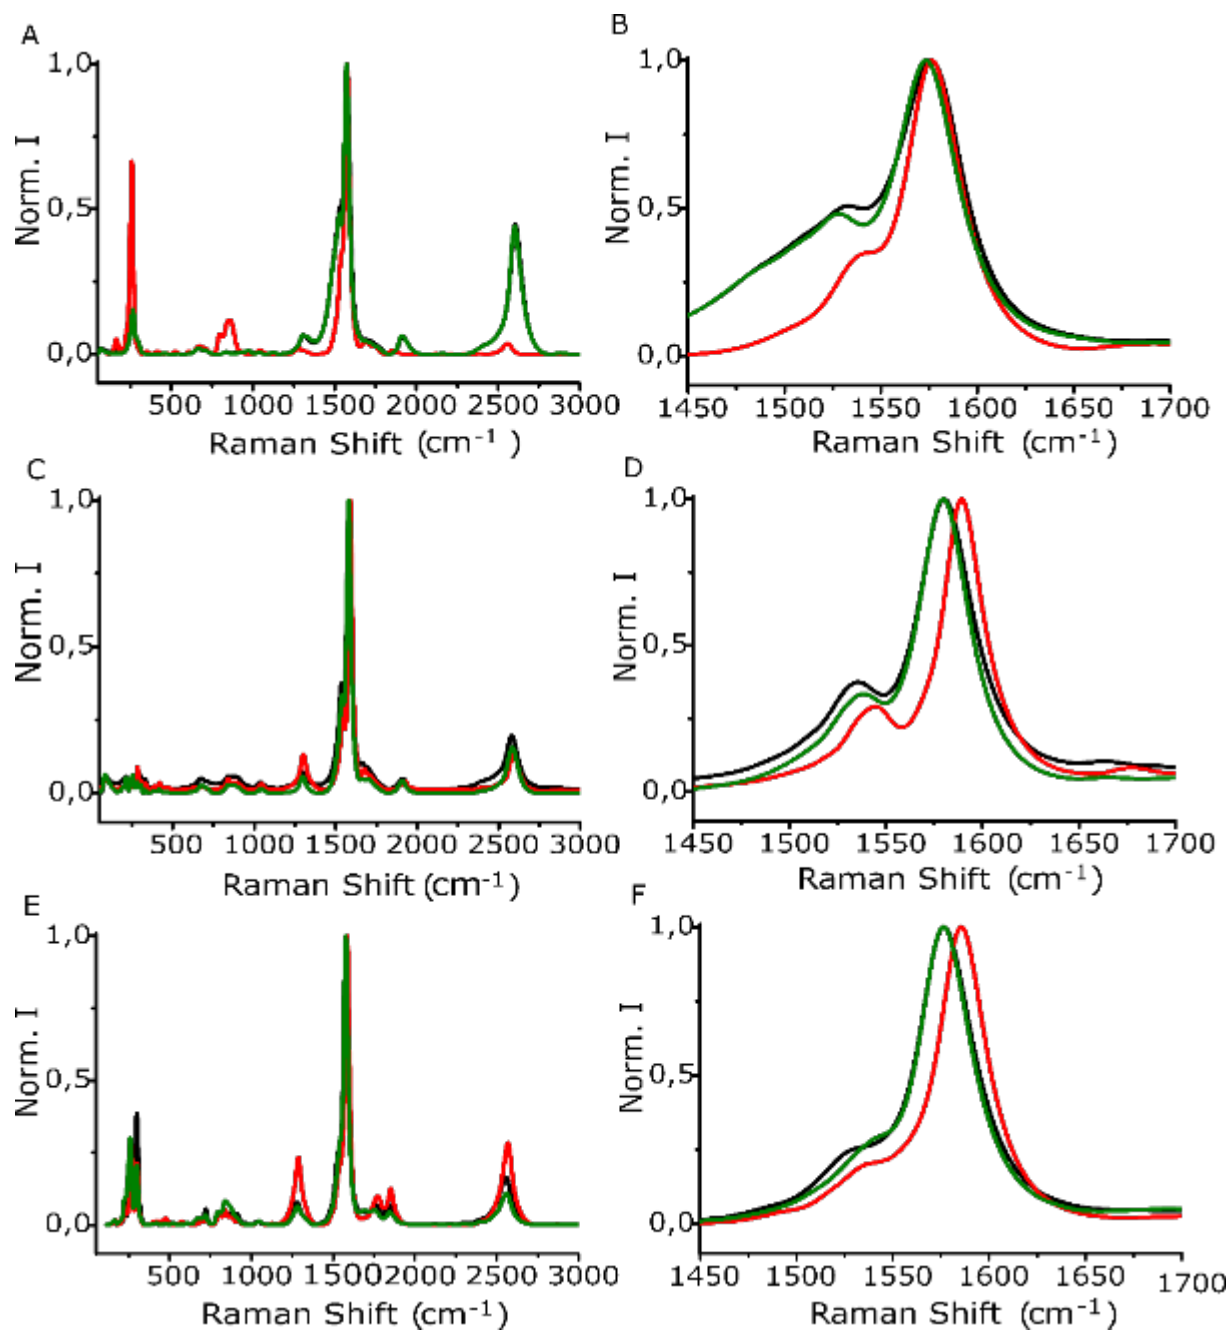

**Figure S11 A-F:** Raman spectra ( $\lambda_{exc} = 532$  nm) of a) (6,5) SWNTs (black line), 3-(6,5)-TCE (red line), 3-(6,5)-DMF (green line). b) Zoom in of the G band of the spectra, Raman spectra ( $\lambda_{exc} = 633$  nm) of c) (6,5) SWNTs (black line) and 3-(6,5)-TCE (solid red line), 3-(6,5)-DMF (green line). d) Zoom in of the G band of the spectra, Raman spectra ( $\lambda_{exc} = 785$  nm) of e) (6,5) SWNTs (black line) and 3-(6,5)-TCE (solid red line), 3-(6,5)-DMF (green line), f) Zoom in of the G band of the spectra.

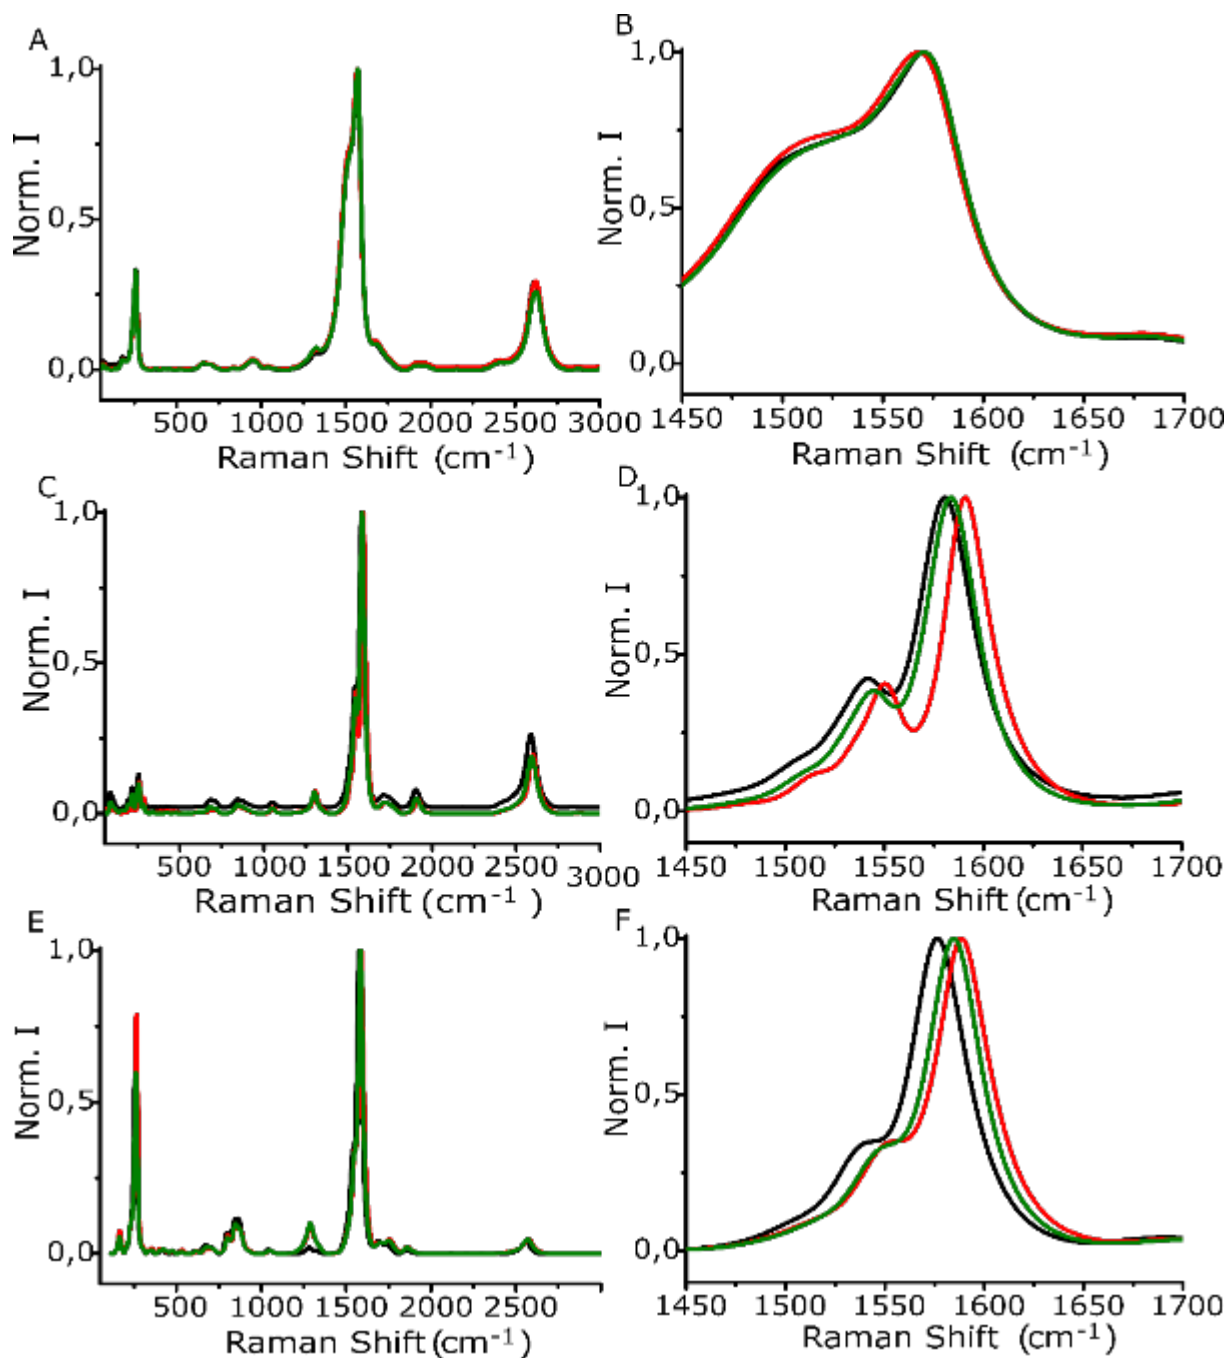

**Figure S12 A-F:** Raman spectra ( $\lambda_{\text{exc}} = 532 \text{ nm}$ ) of a) (7,6) SWNTs (black line), 3-(7,6)-TCE (red line) and 3-(7,6)-DMF (green line), b) Zoom in of the G band of the spectra, Raman spectra ( $\lambda_{\text{exc}} = 633 \text{ nm}$ ) of c) (7,6) SWNTs (black line), 3-(7,6)-TCE (solid red line) and 3-(7,6)-DMF (green line), d) Zoom in of the G band of the spectra, Raman spectra ( $\lambda_{\text{exc}} = 785 \text{ nm}$ ) of e) (7,6) SWNTs (black line), 3-(7,6)-TCE (solid red line) and 3-(7,6)-DMF (green line), f) Zoom in of the G band of the spectra.

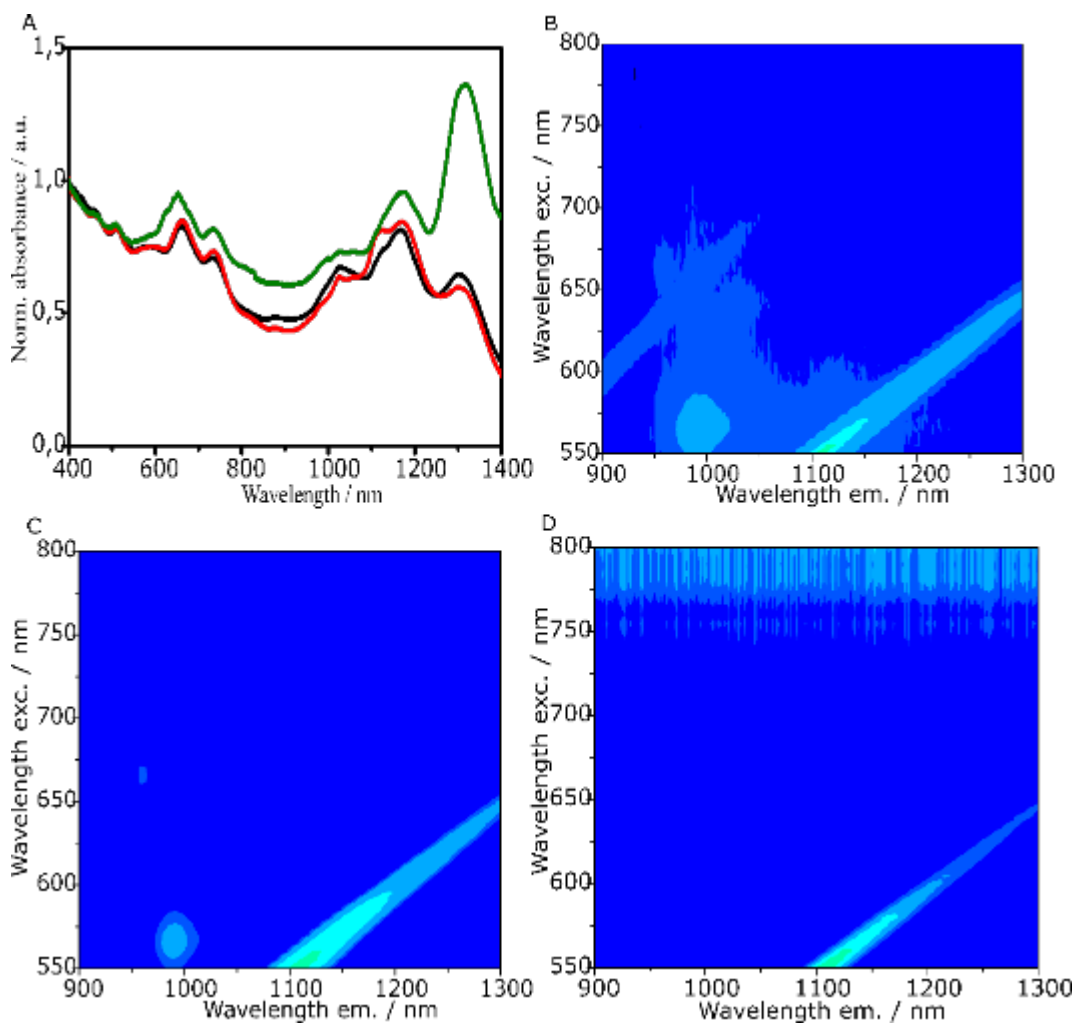

**Figure S13 A-D:** a) UV-vis-NIR absorption spectra ( $D_2O$ , 1% SDS, room temperature) of pristine (6,5)-enriched SWNTs (black), and the products of their reactions with **3** in TCE (red) and DMF (green). PLE intensity maps ( $D_2O$ , 1% SDS, room temperature) of b) pristine (6,5) enriched SWNTs, c) **3**-(6,5)-TCE and d) **3**-(6,5)-DMF.
